# Supplementary material for: Gastroesophageal reflux GWAS identifies risk loci that also associate with subsequent severe esophageal diseases
Source: PubMed Central journal article supplement (PMC6746768; doi:10.1038/s41467-019-11968-2), 2019-09-16
Supplement: 41467_2019_11968_MOESM1_ESM.pdf [file 41467_2019_11968_MOESM1_ESM.pdf]

**An *et al.* Gastroesophageal reflux GWAS identifies first risk loci that also associate with subsequent severe esophageal diseases**

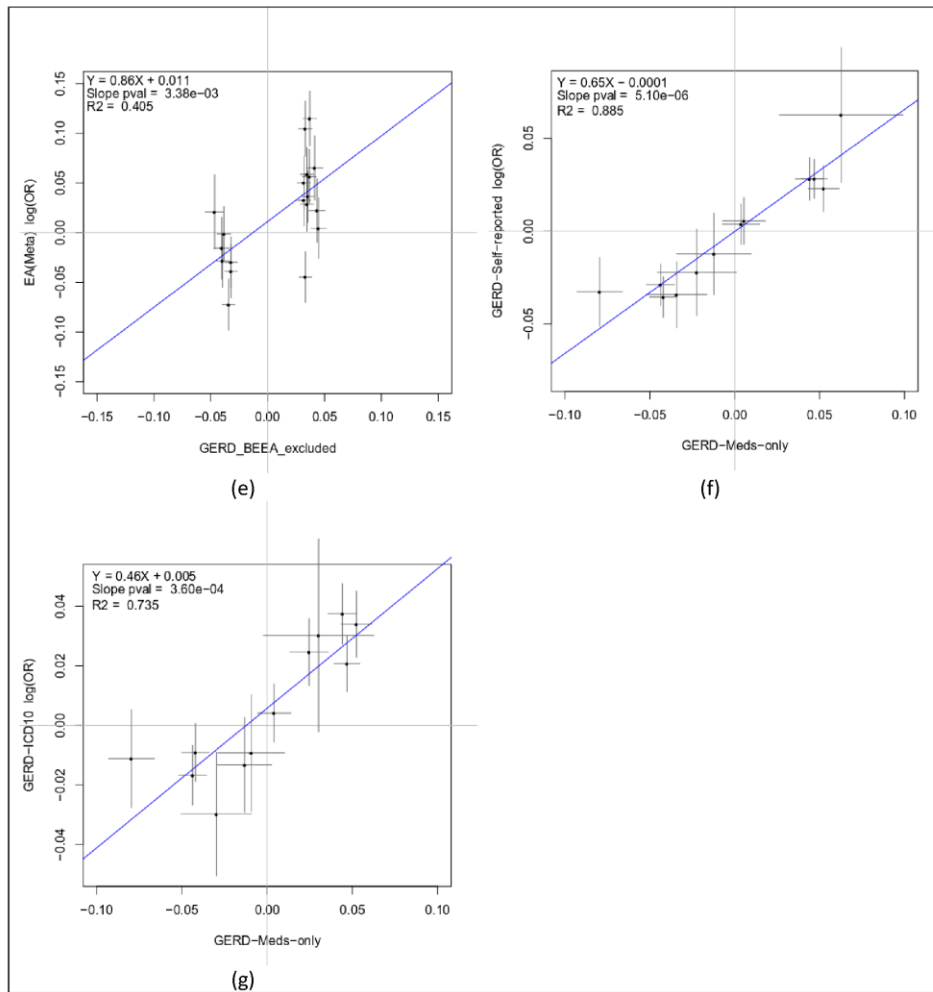

**Supplementary Figure 1.** (a) The correlation of UKBB GERD vs 23andMe. (b) The correlation of UKBB GERD vs QSKIN GERD. (c) The correlation of Meta GERD (BE/EA samples excluded) vs Meta BEEA. (d) The correlation of Meta GERD (BE/EA samples excluded) vs Meta BE. (e) The correlation of Meta GERD (BE/EA samples excluded) vs EA. Log of significant independent SNPs from GCTA COJO are represented on the x-axis. The corresponding logOR of SNPs from 23andMe and QSKIN are shown on the y-axis. The lengths of the lines for each SNP represent the standard error for the respective logOR. Linear regression was undertaken using the weight of the MAF variance ( $MAF * (1-MAF)$ ). (f) The correlation of GERD from medicine pheno type only (self-report GERD and ICD10 medical record samples excluded) vs GERD from self-reported pheno type only. (g) The correlation of GERD from medicine pheno type only (self-report GERD and ICD10 medical record samples excluded) vs GERD from ICD10 medical record pheno type only.

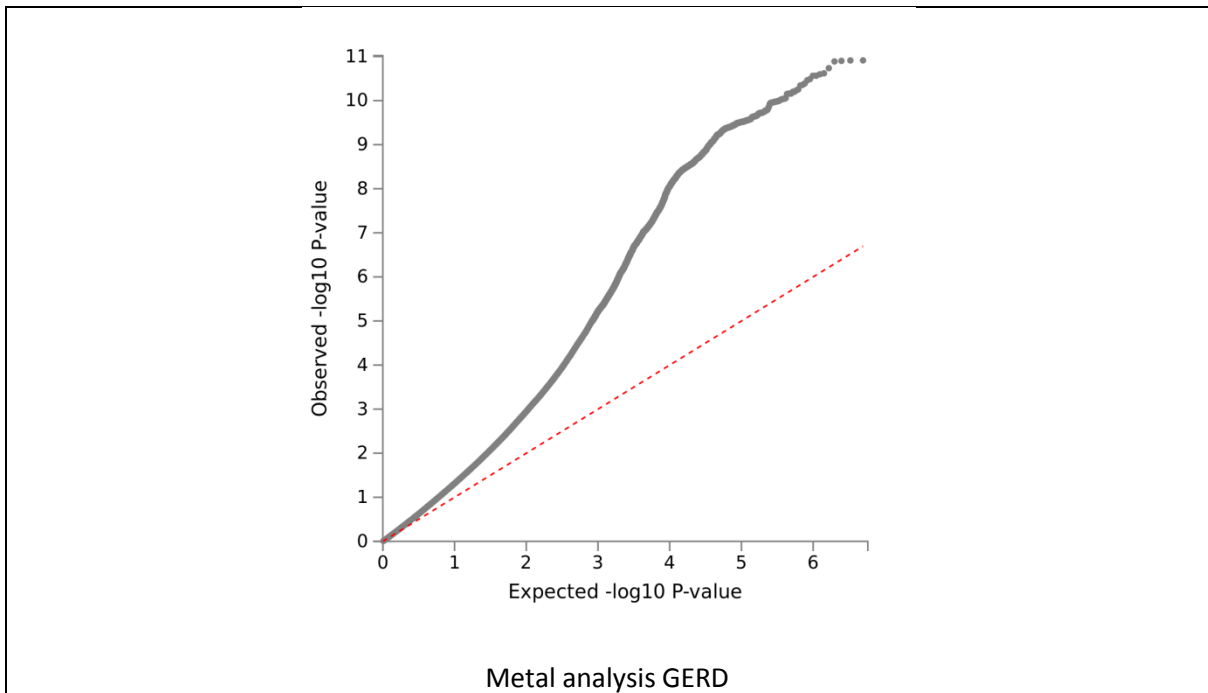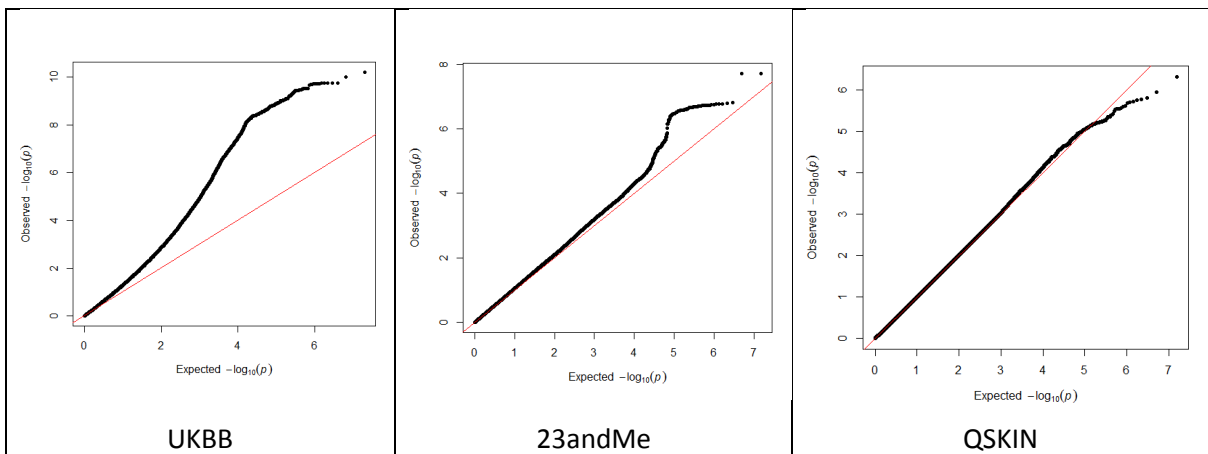

Supplementary Figure 2. QQ plot of GERD GWAS using summary statistics.

Plotted SNPs

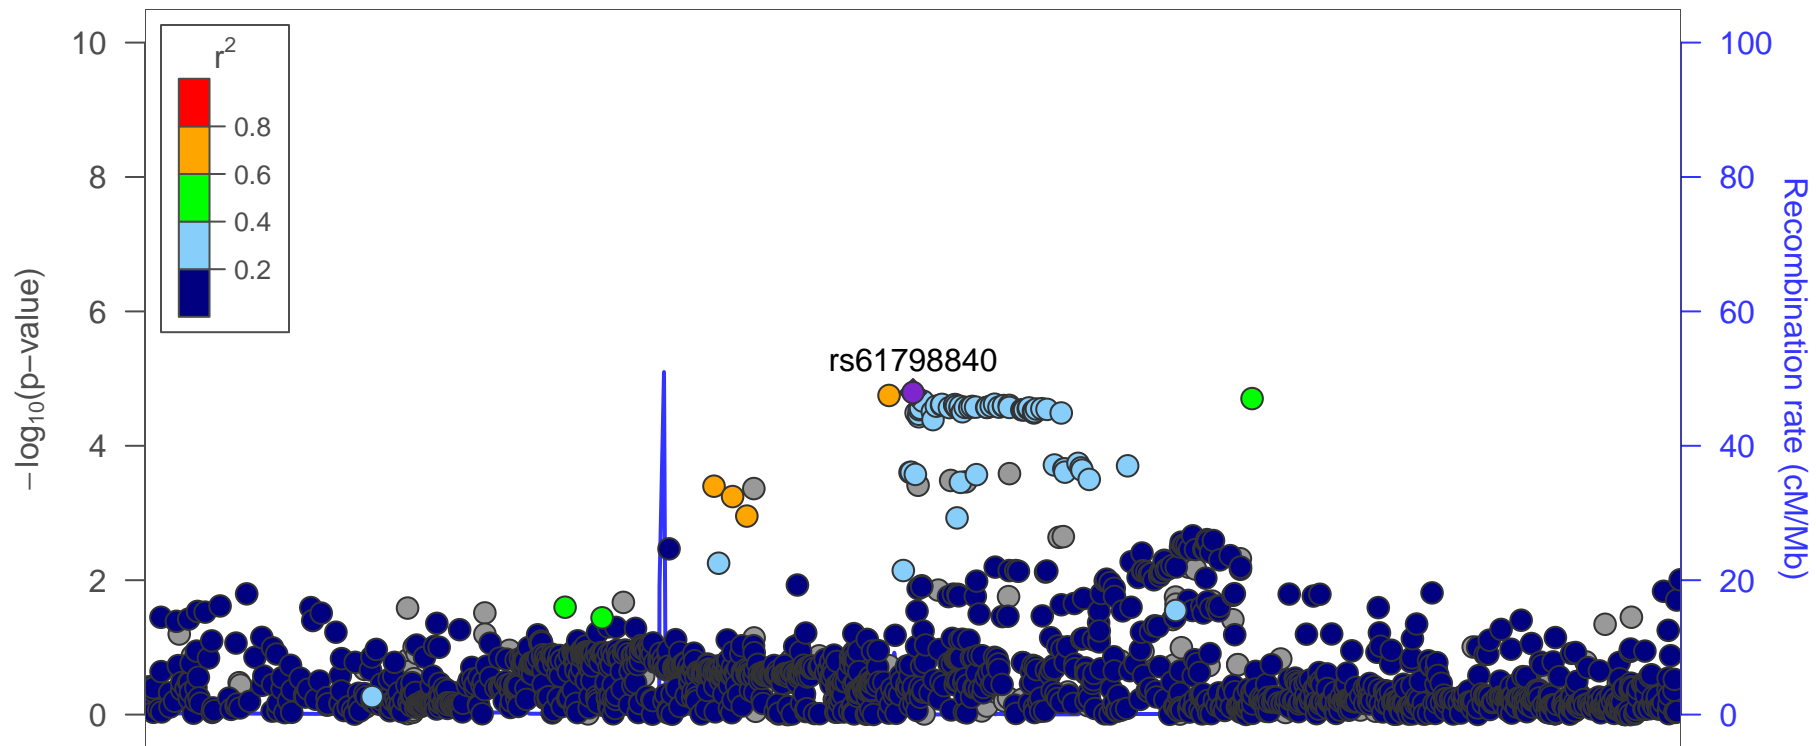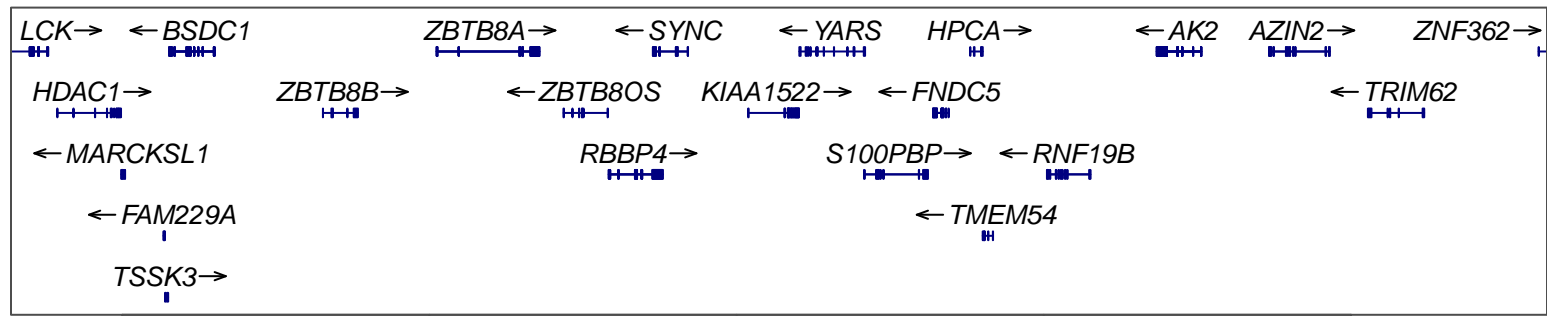

32.8                      33                      33.2                      33.4                      33.6

Position on chr1 (Mb)

Plotted SNPs

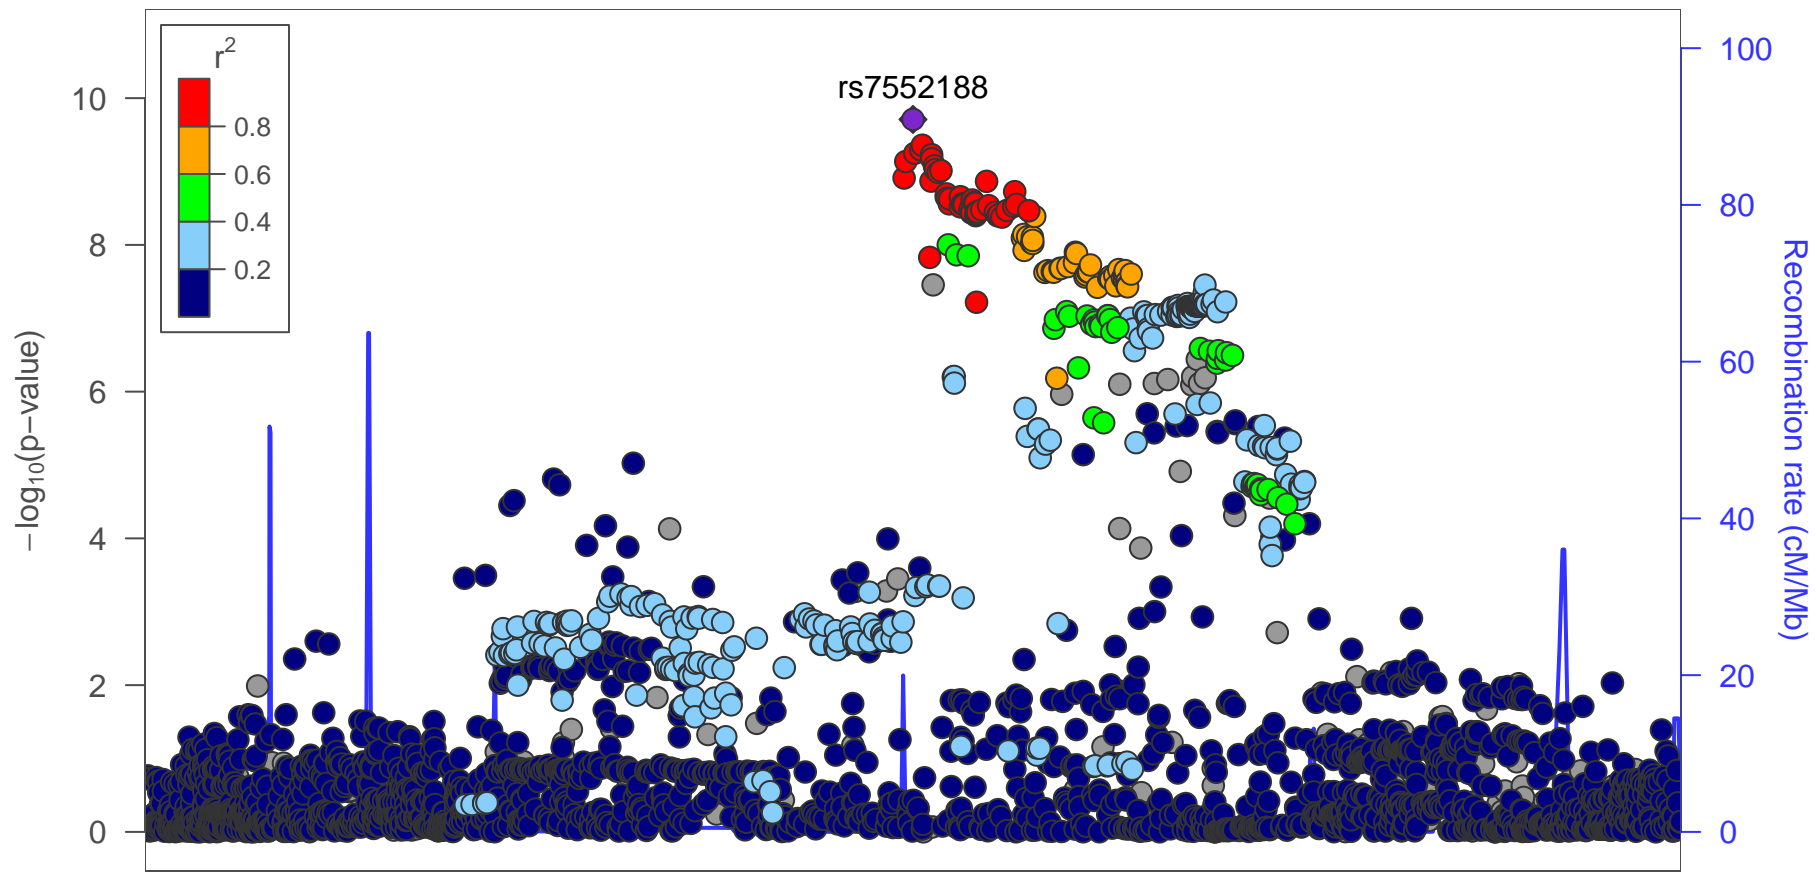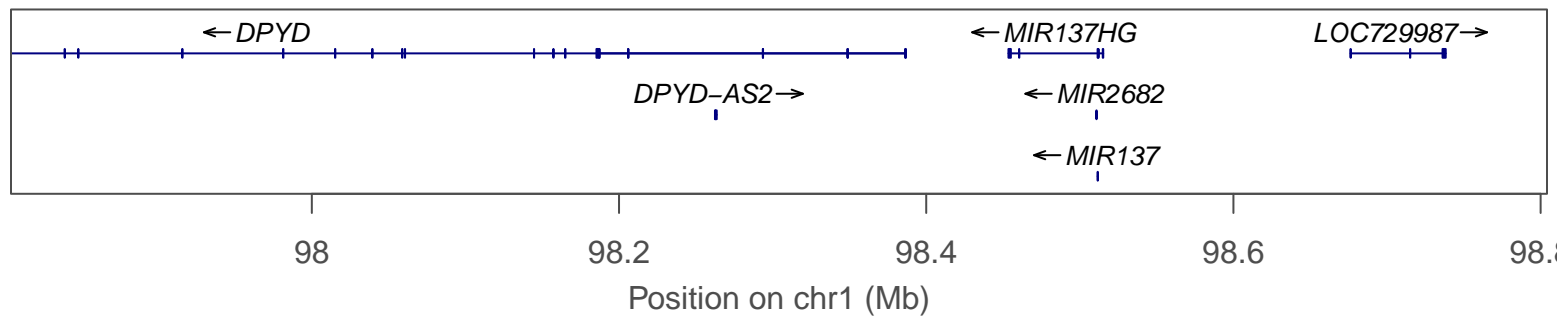

Plotted SNPs

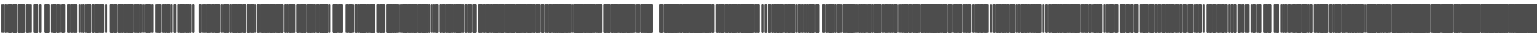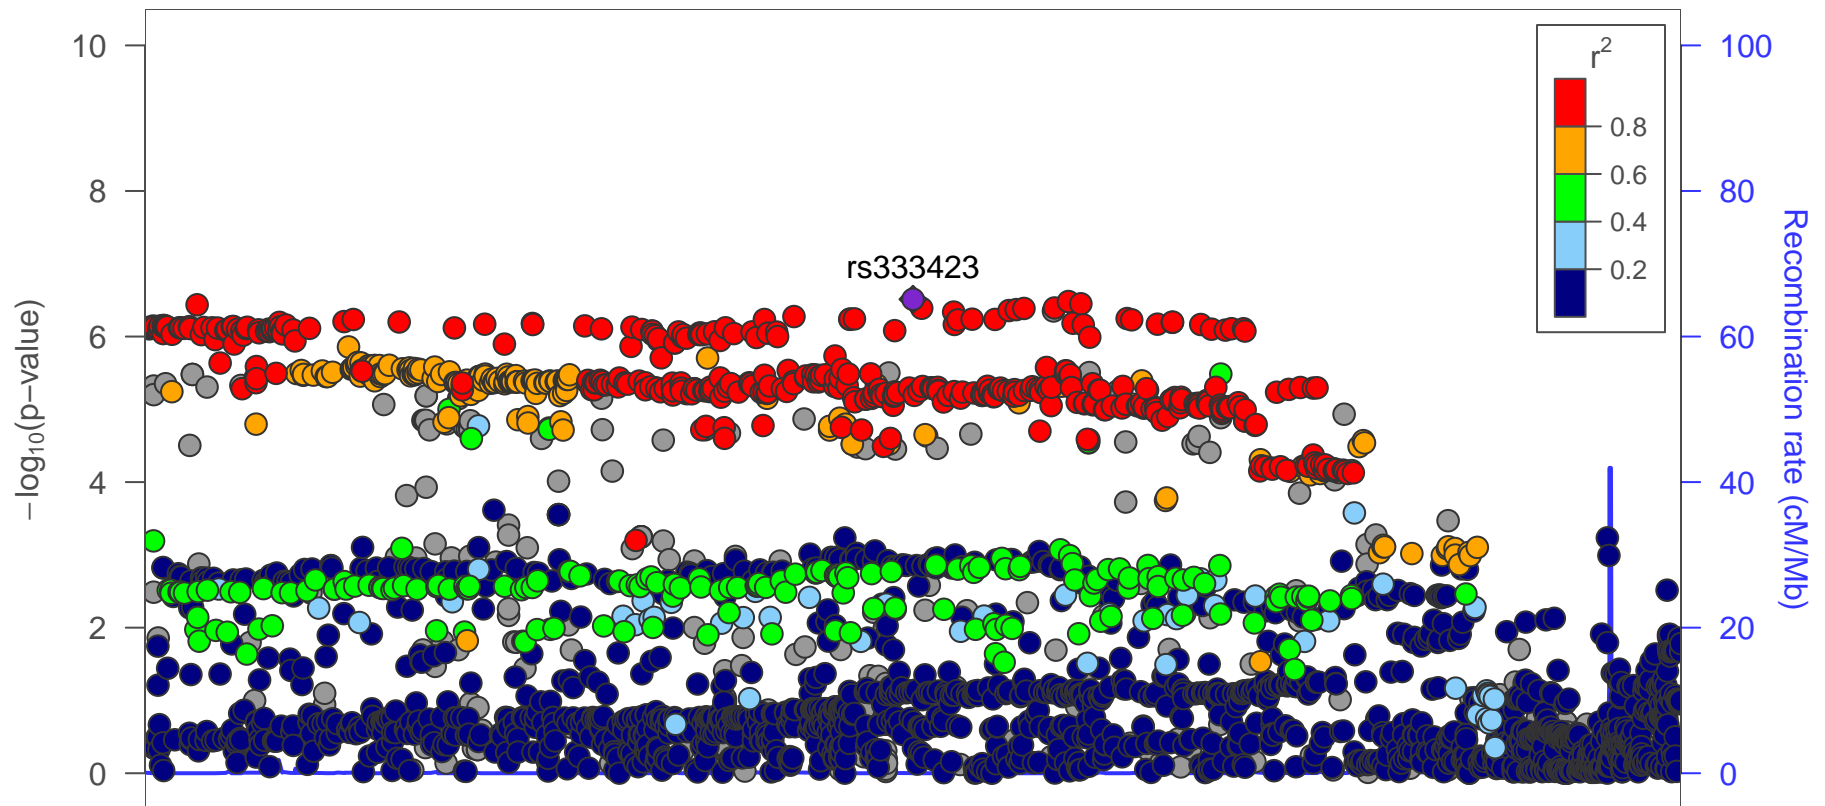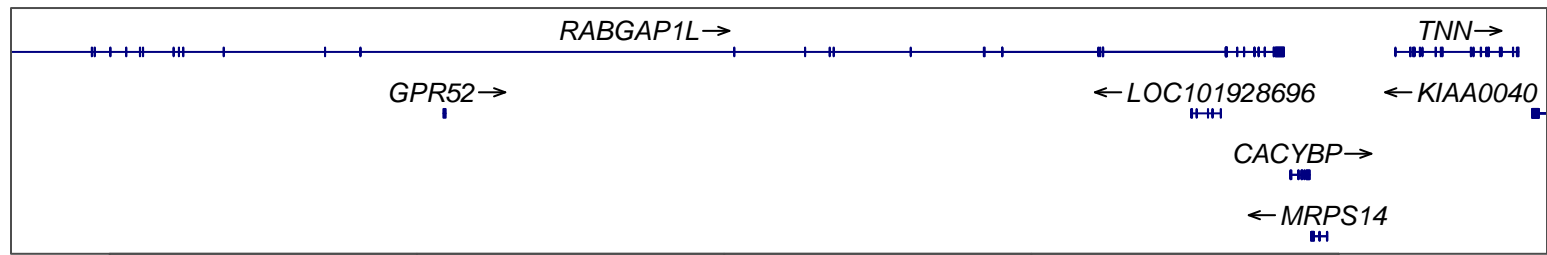

174.2                      174.4                      174.6                      174.8                      175

Position on chr1 (Mb)

Plotted SNPs

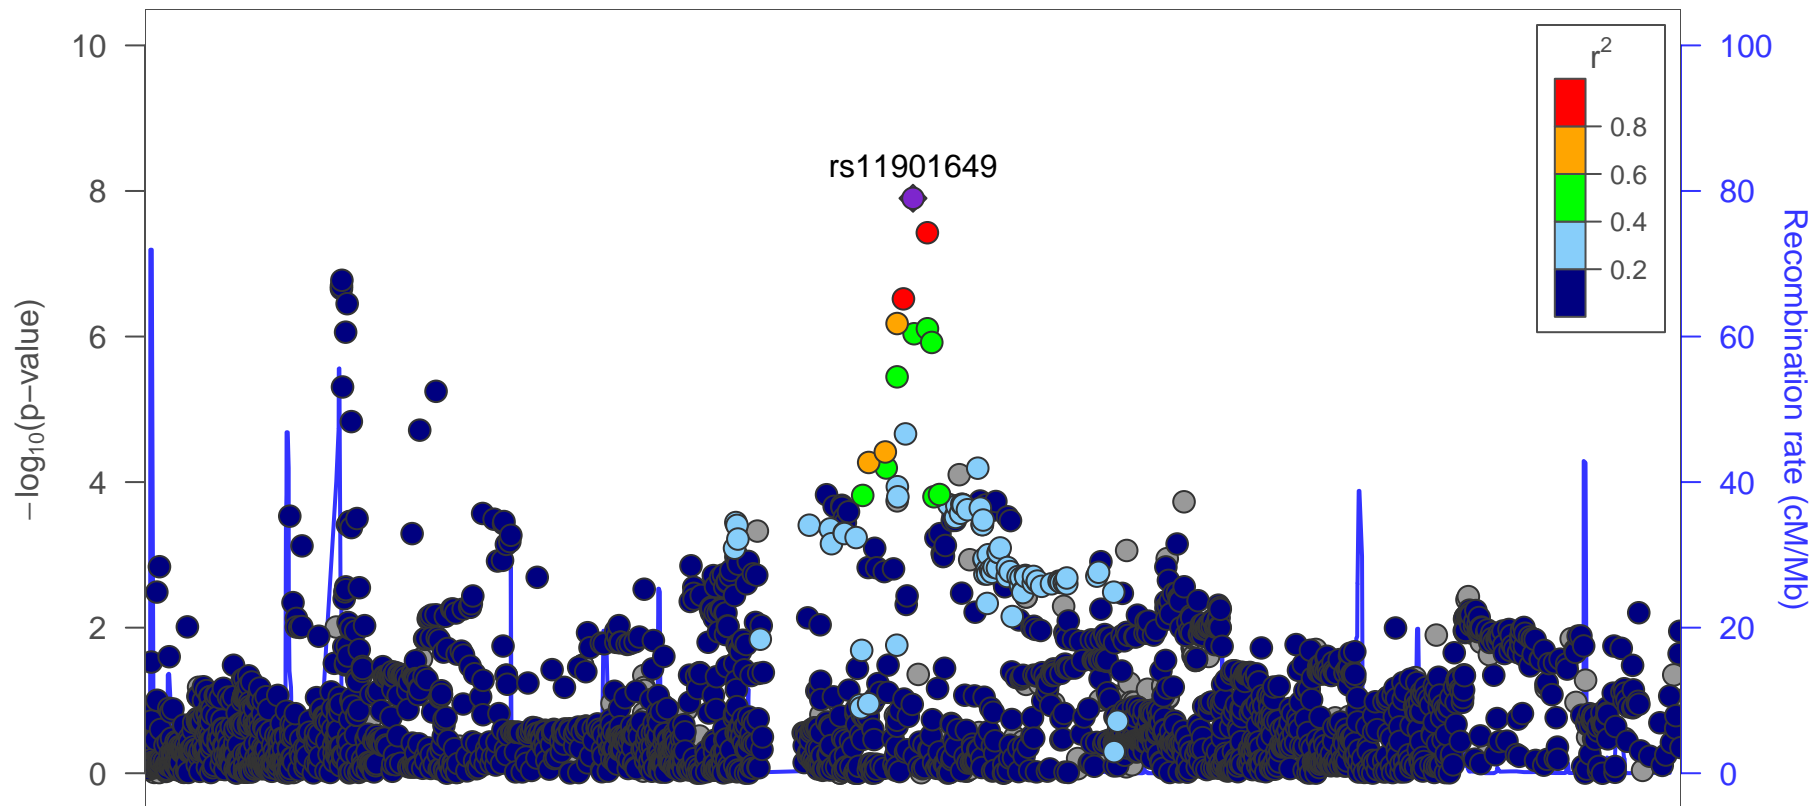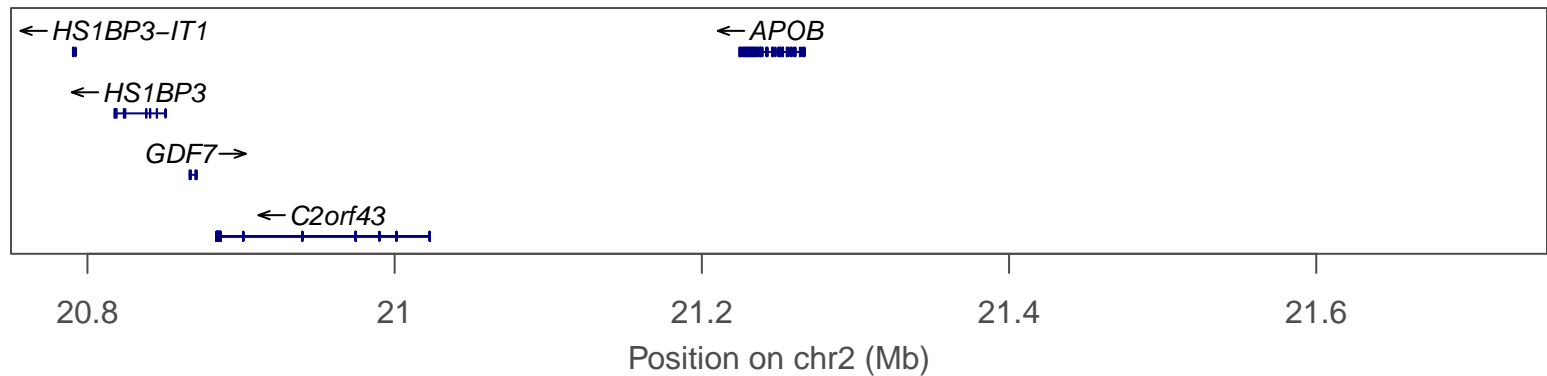

Plotted SNPs

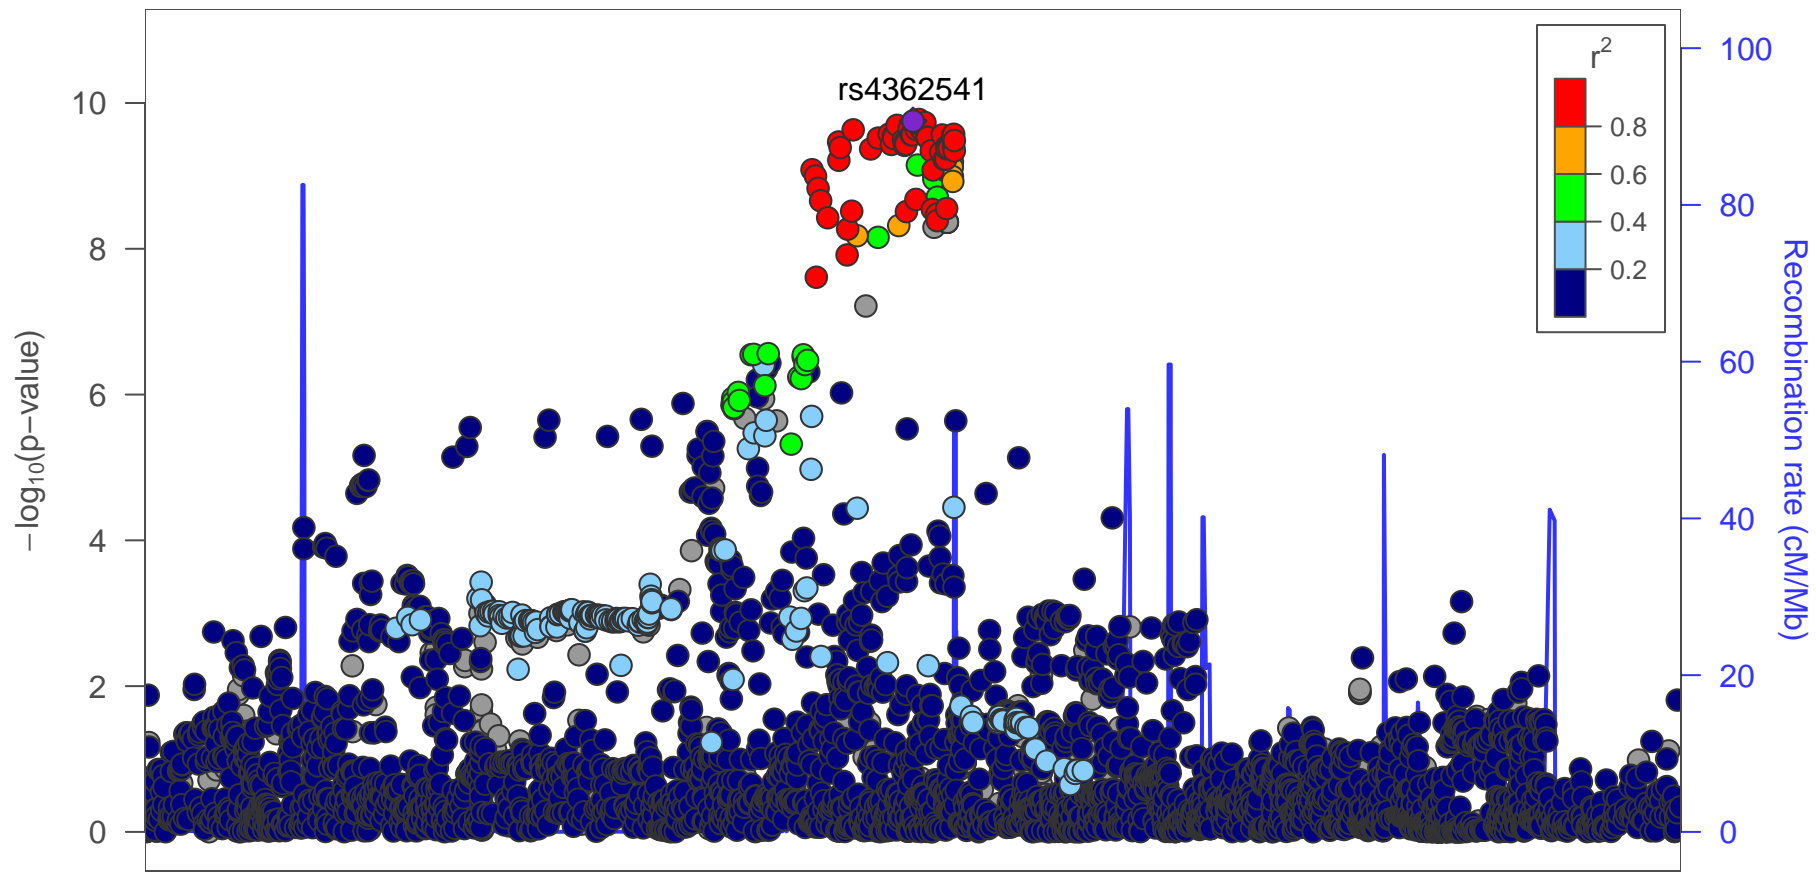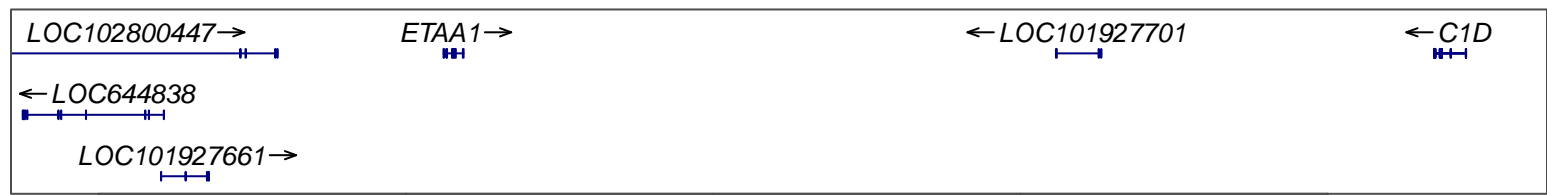

67.4                      67.6                      67.8                      68                      68.2

Position on chr2 (Mb)



Plotted SNPs

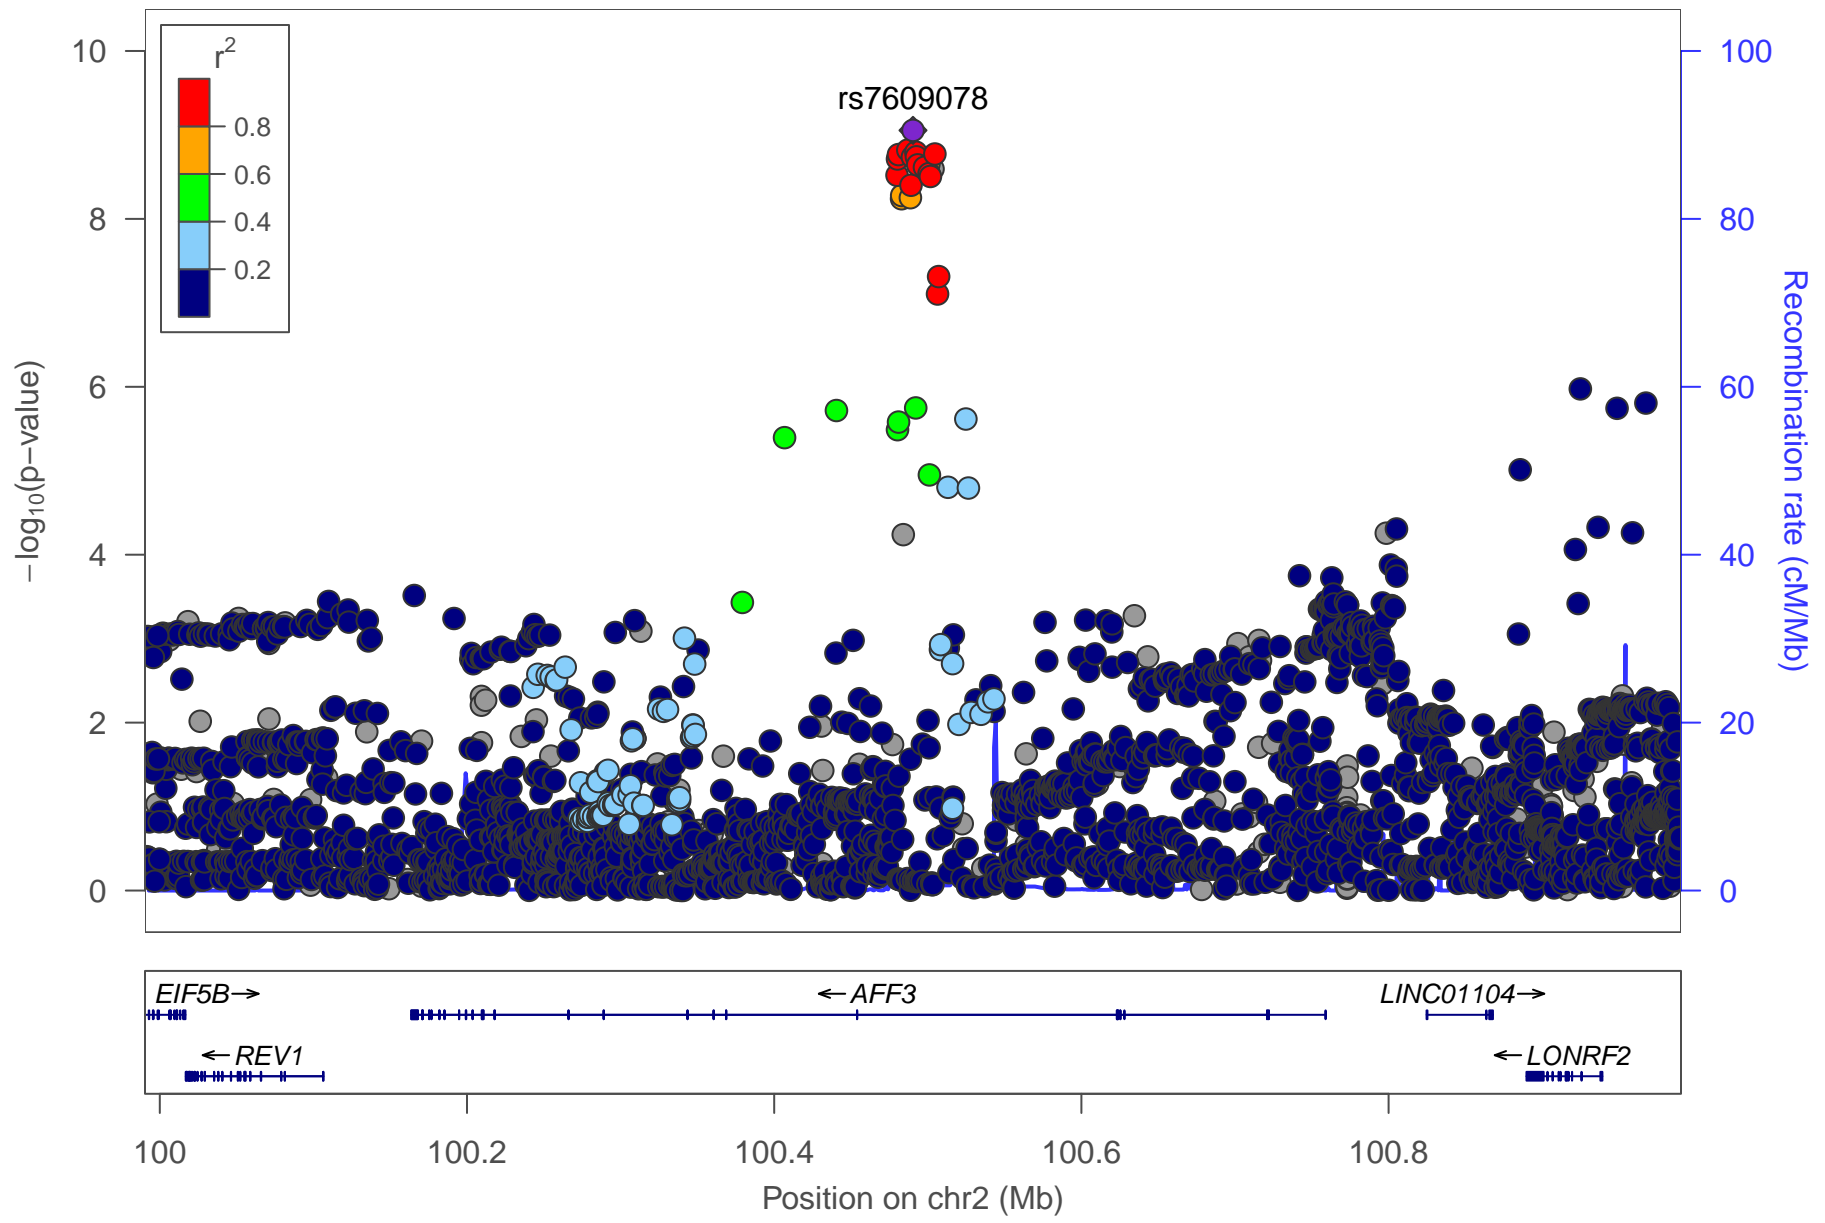

Plotted SNPs

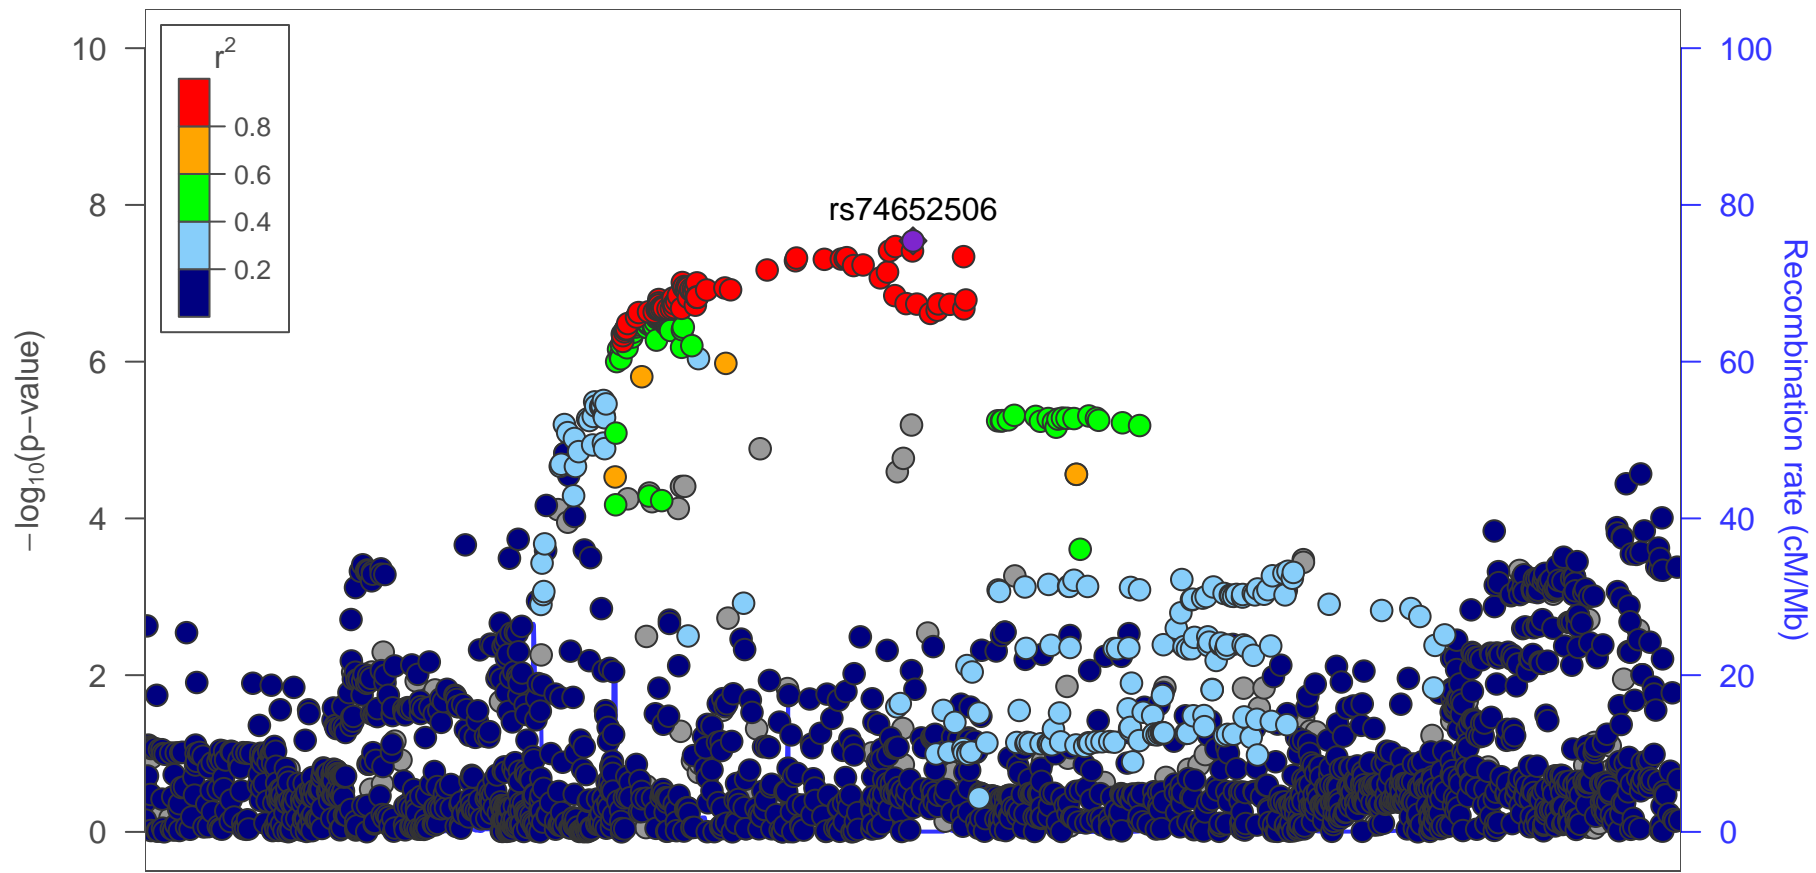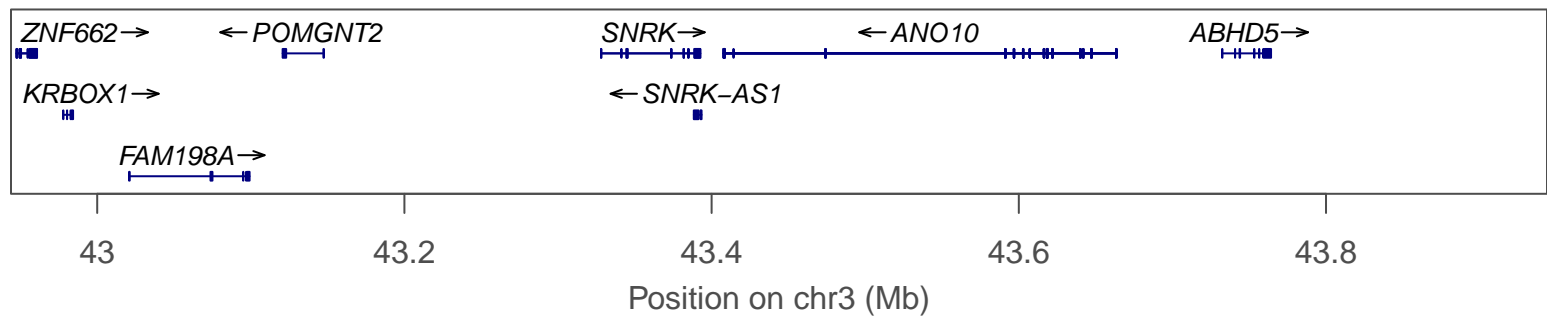

Plotted SNPs

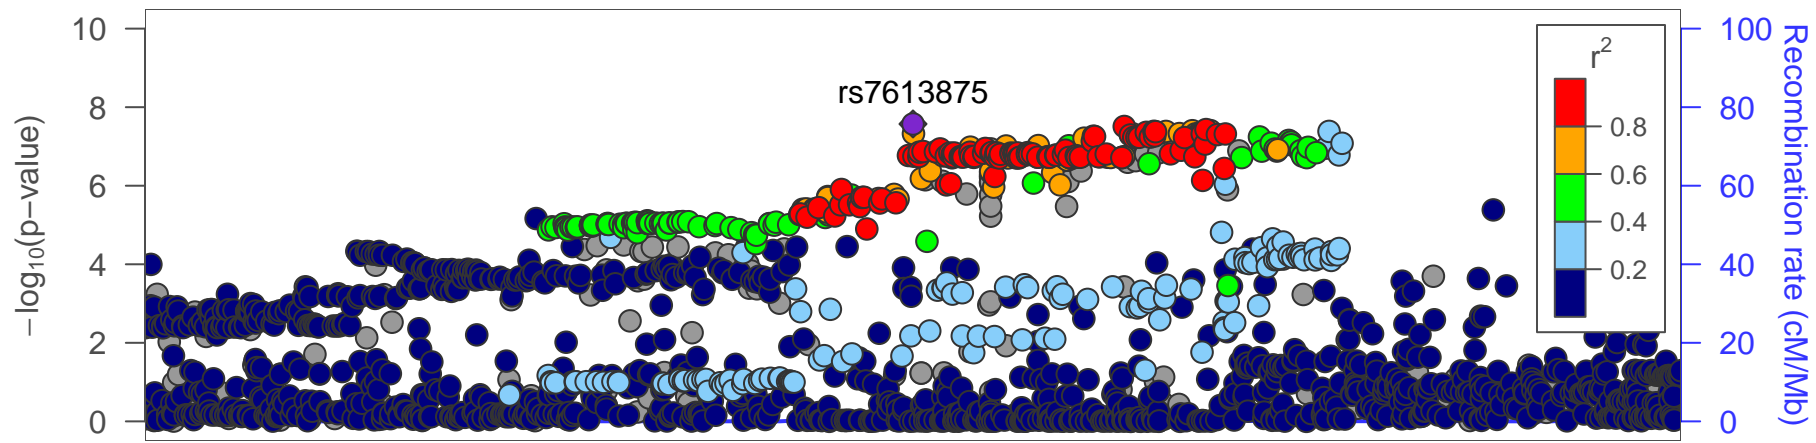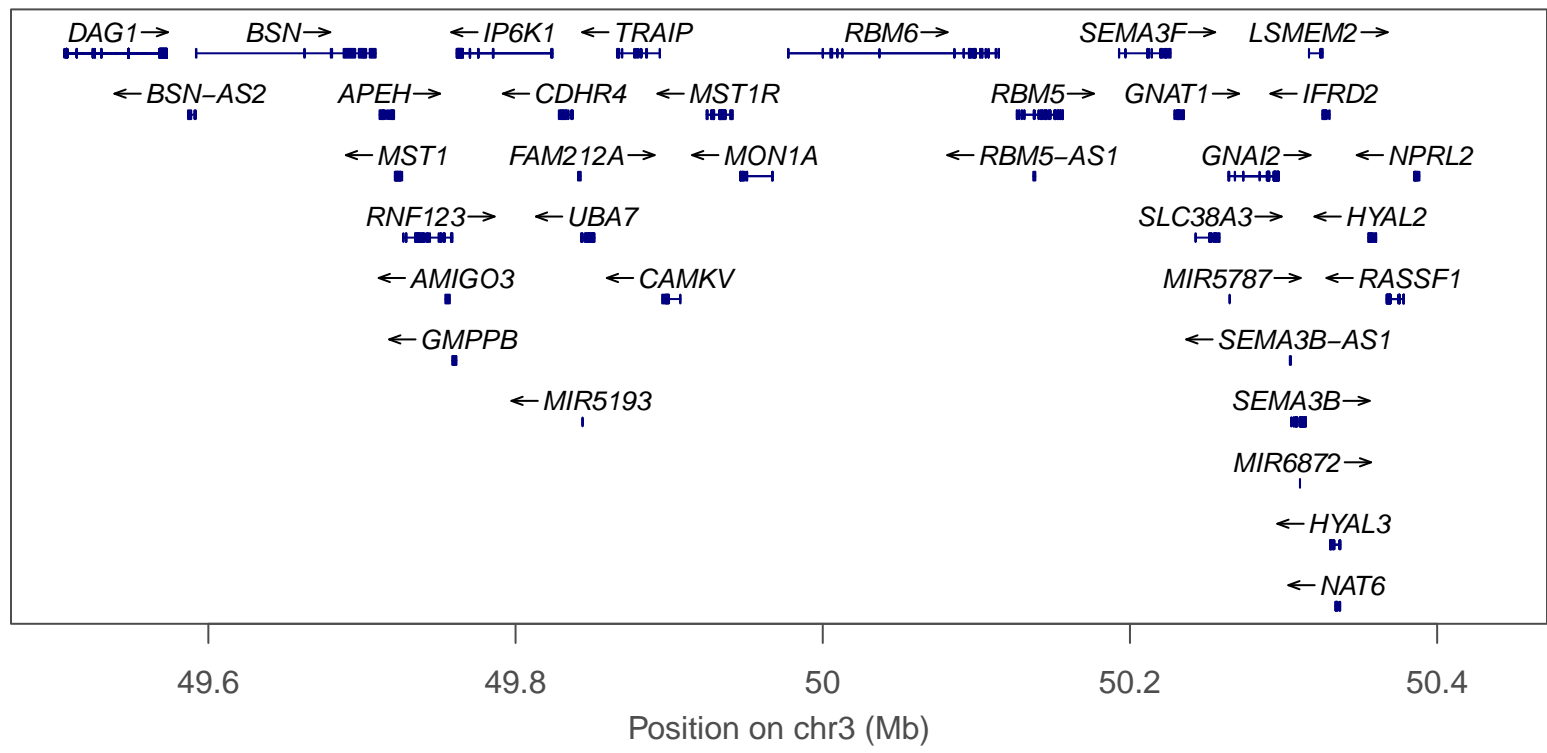

Plotted SNPs

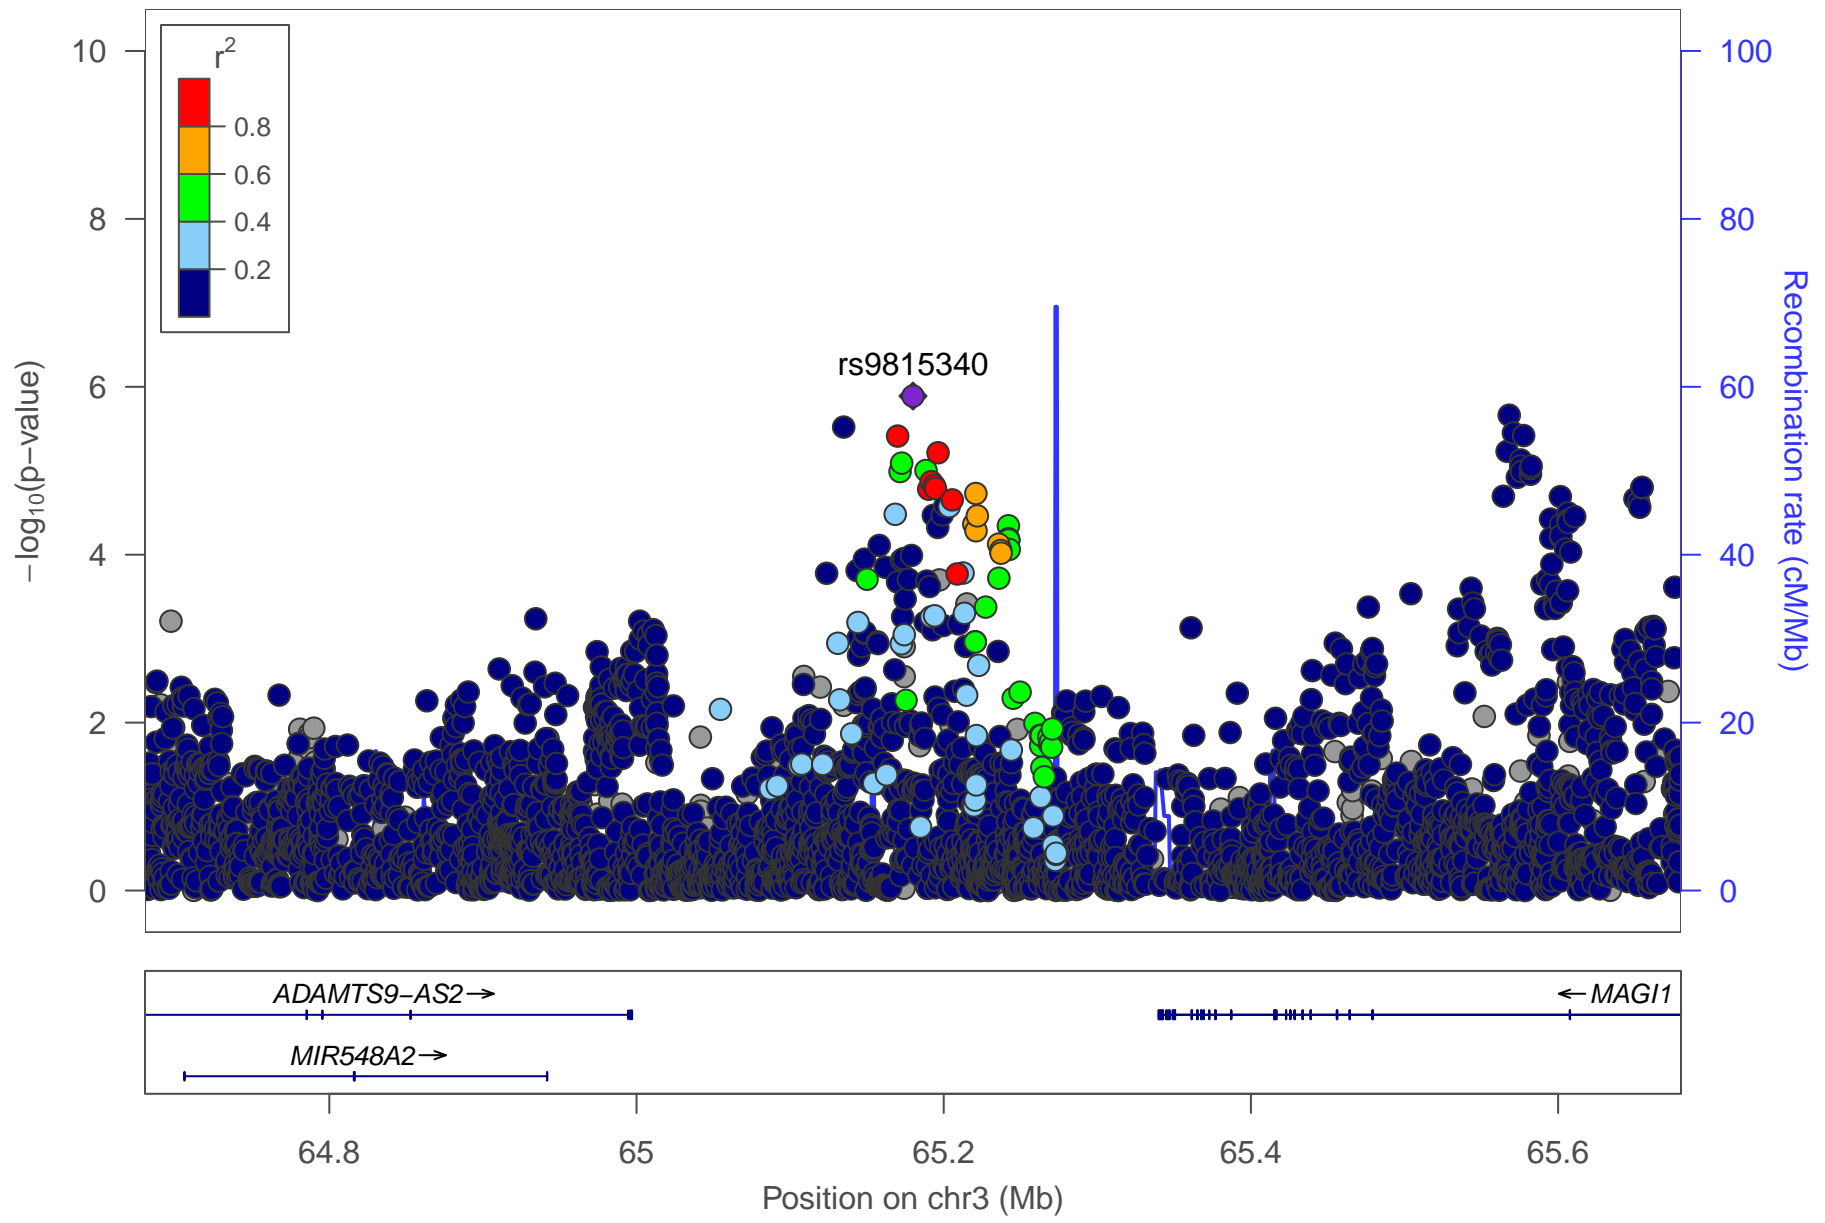

Plotted SNPs

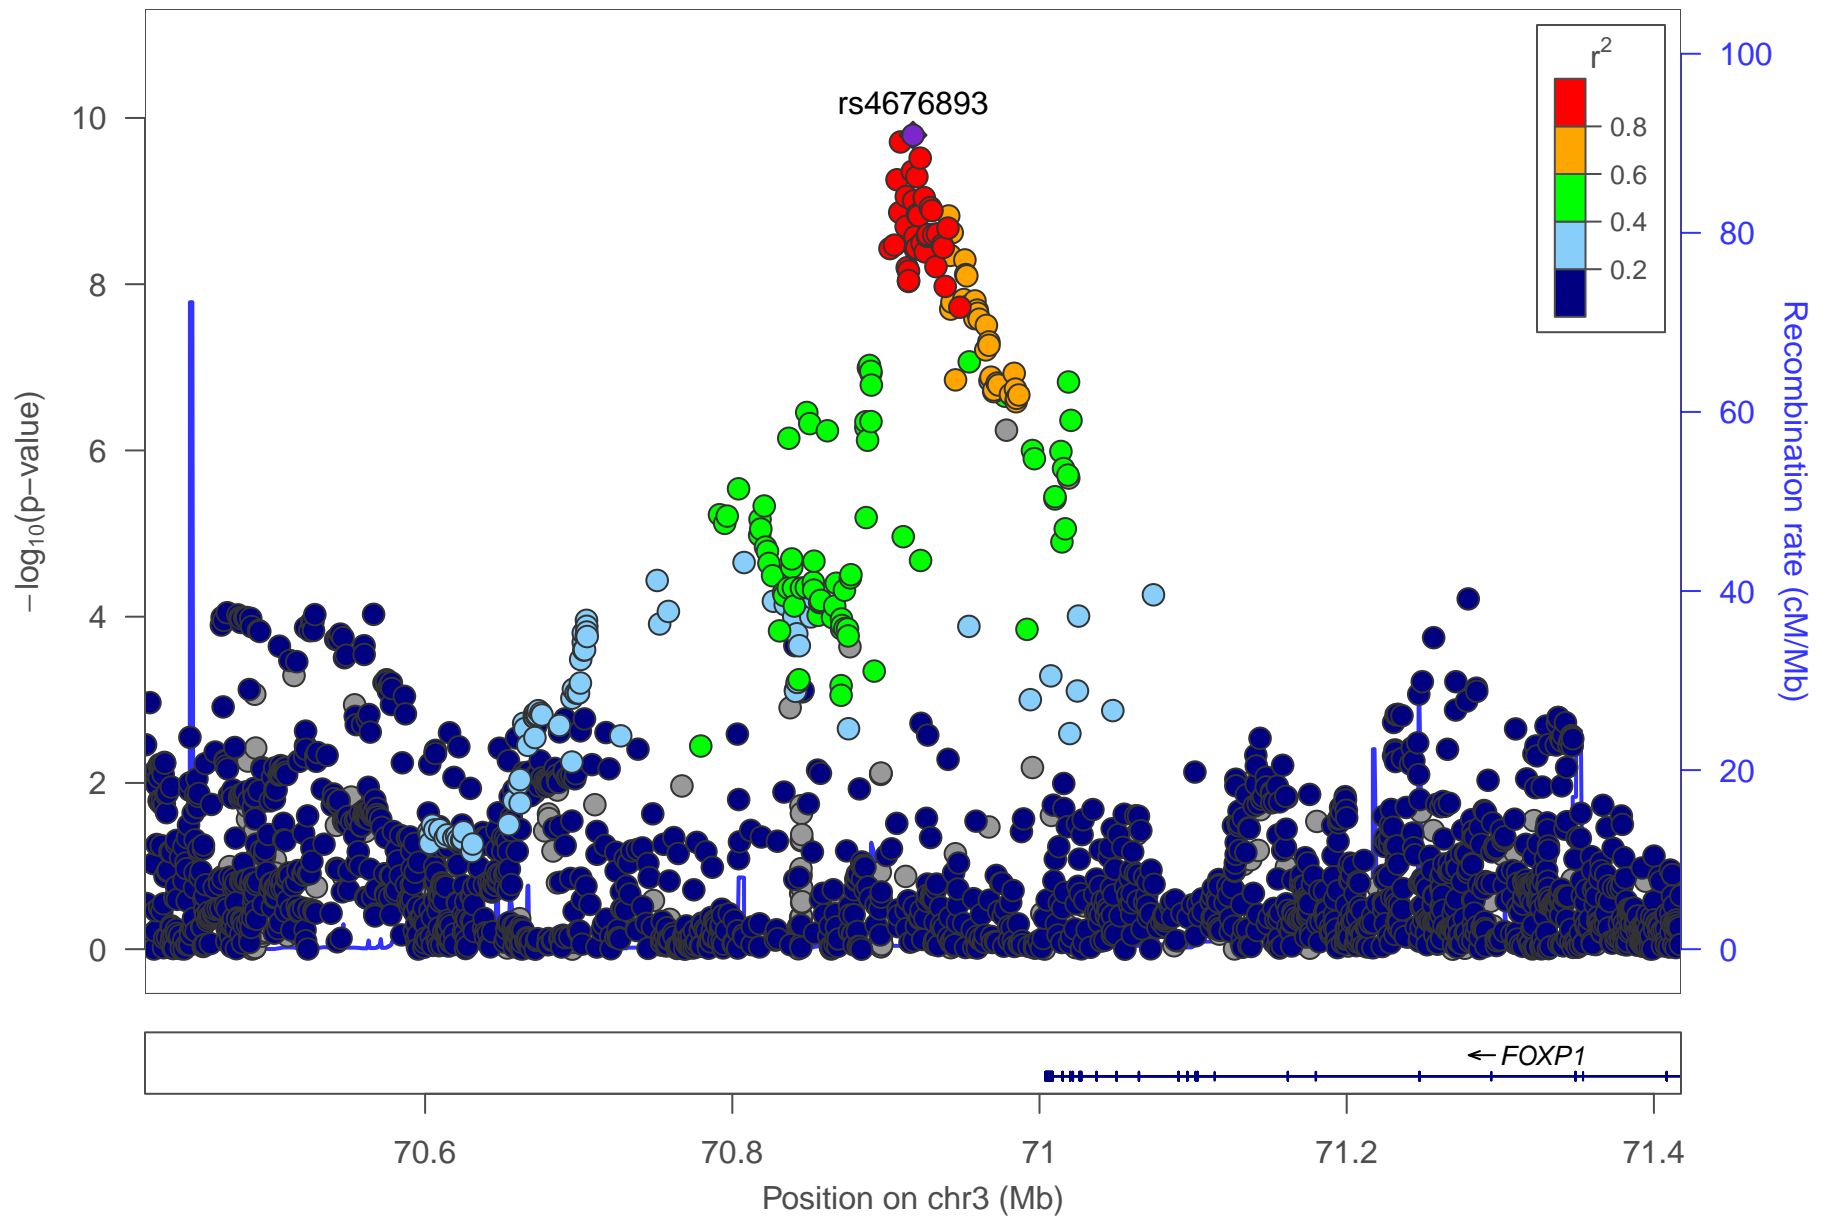

Plotted SNPs

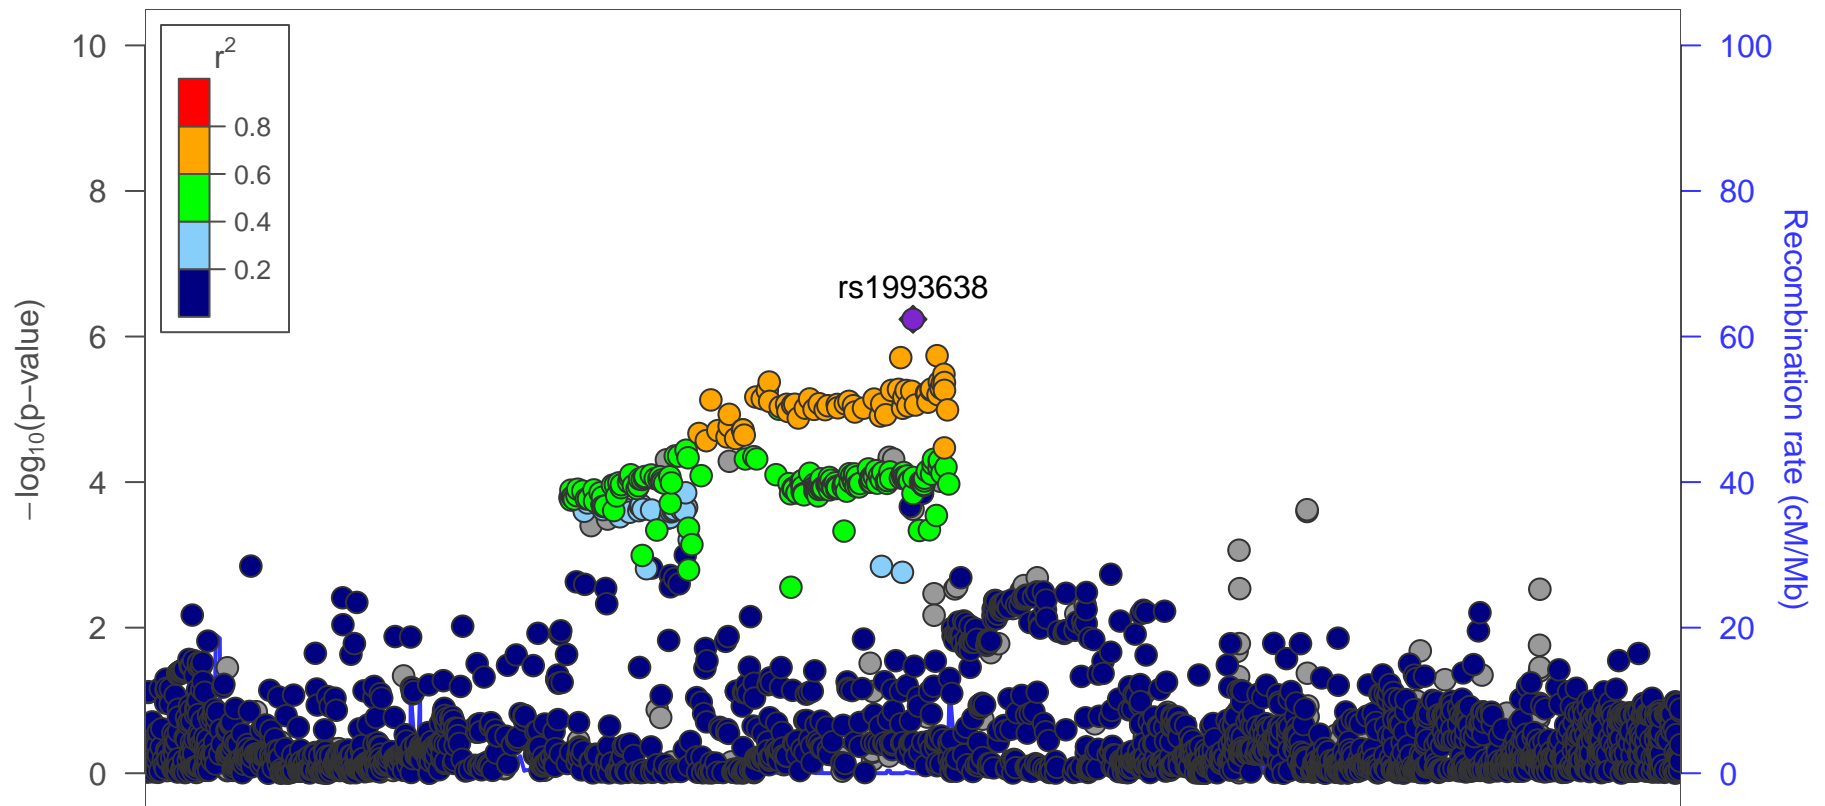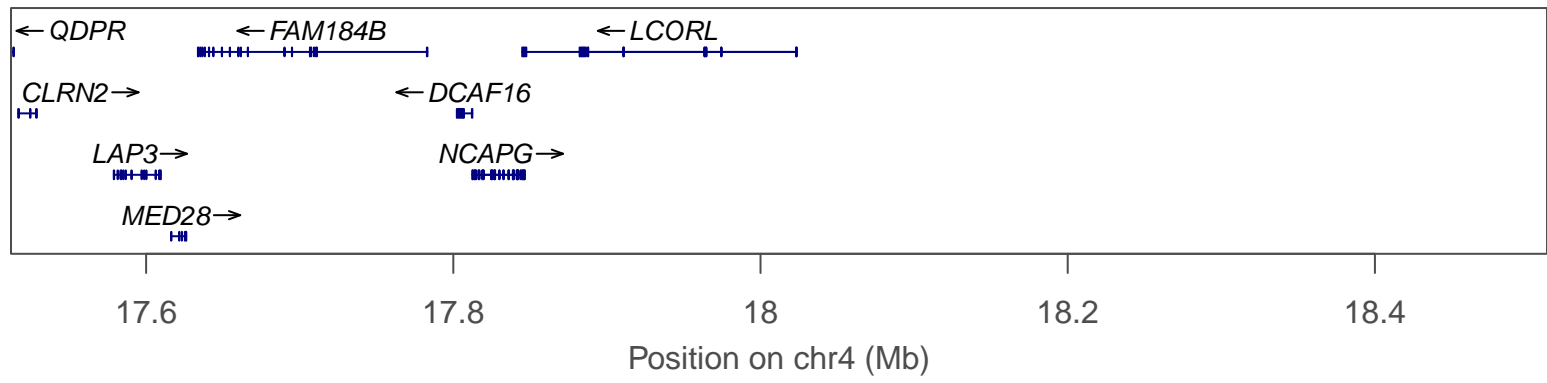

Plotted SNPs

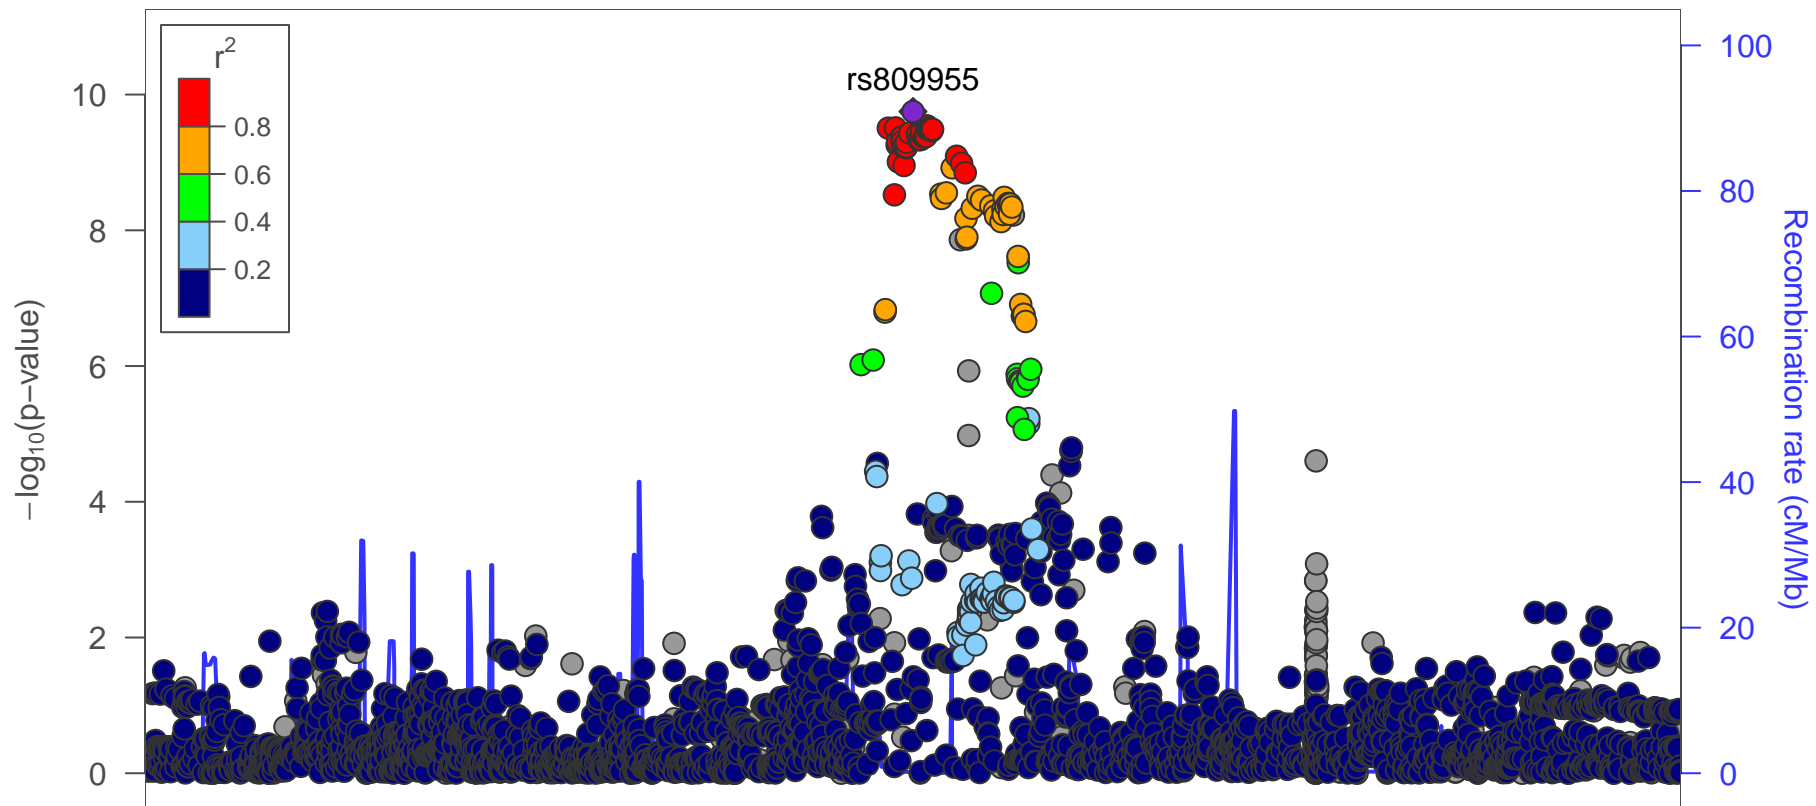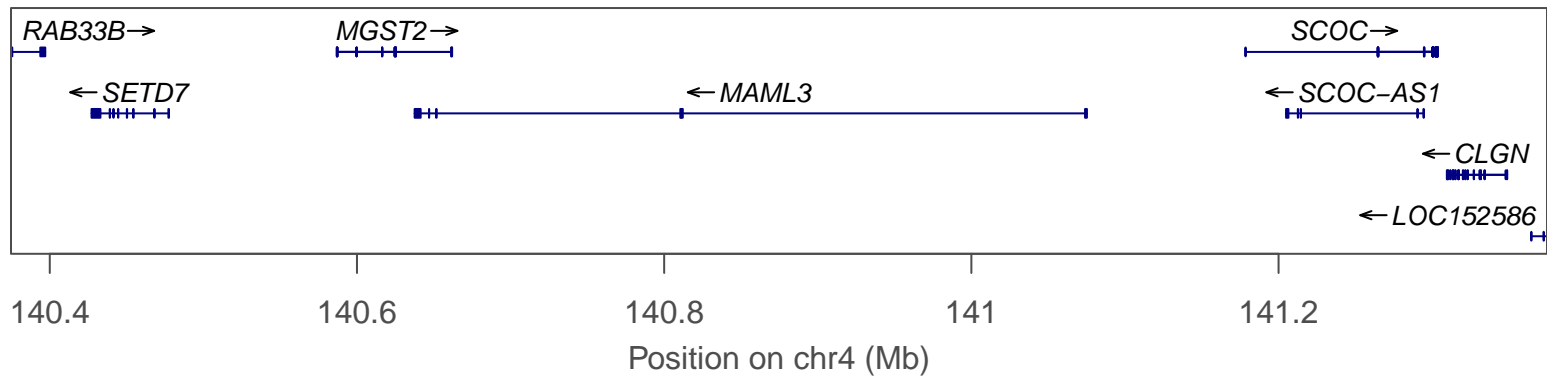

Plotted SNPs

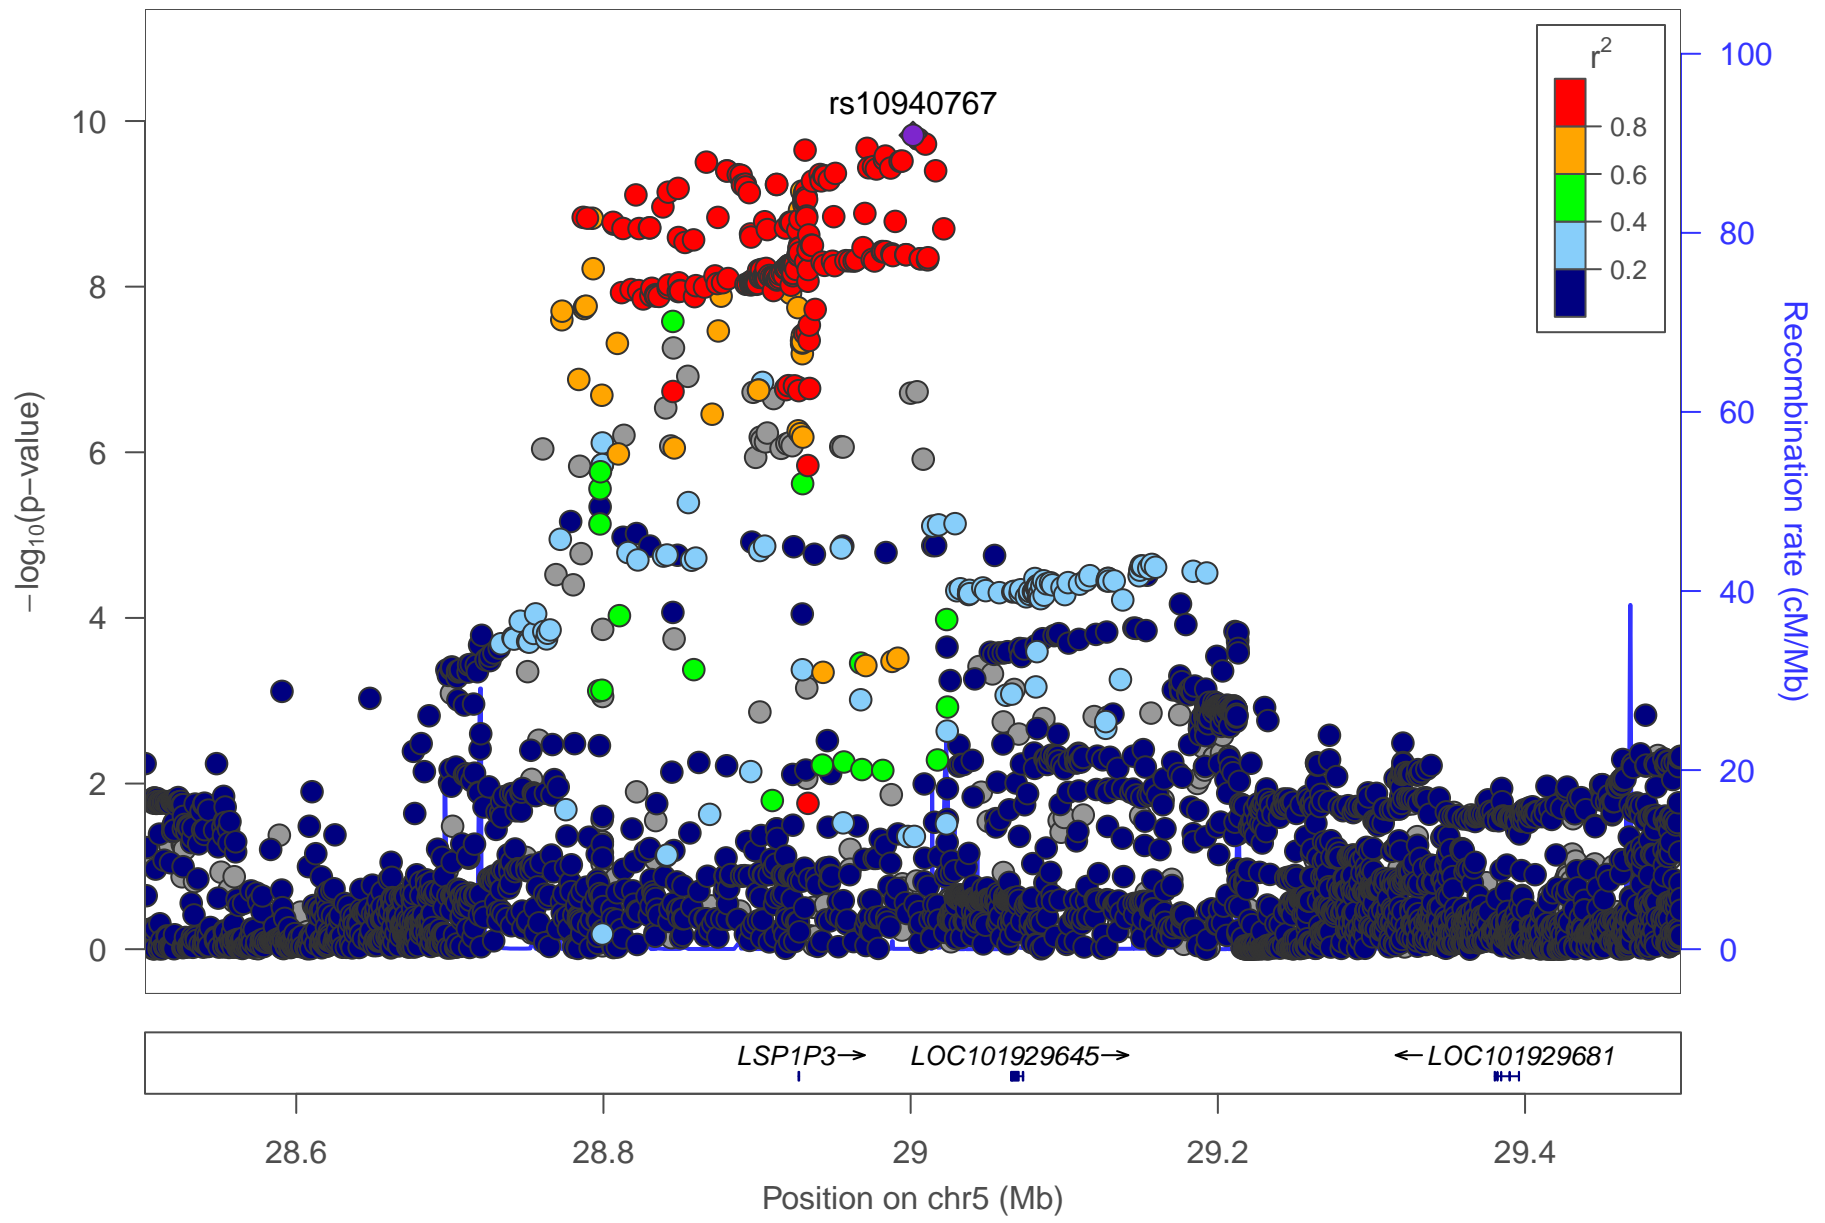



Plotted SNPs

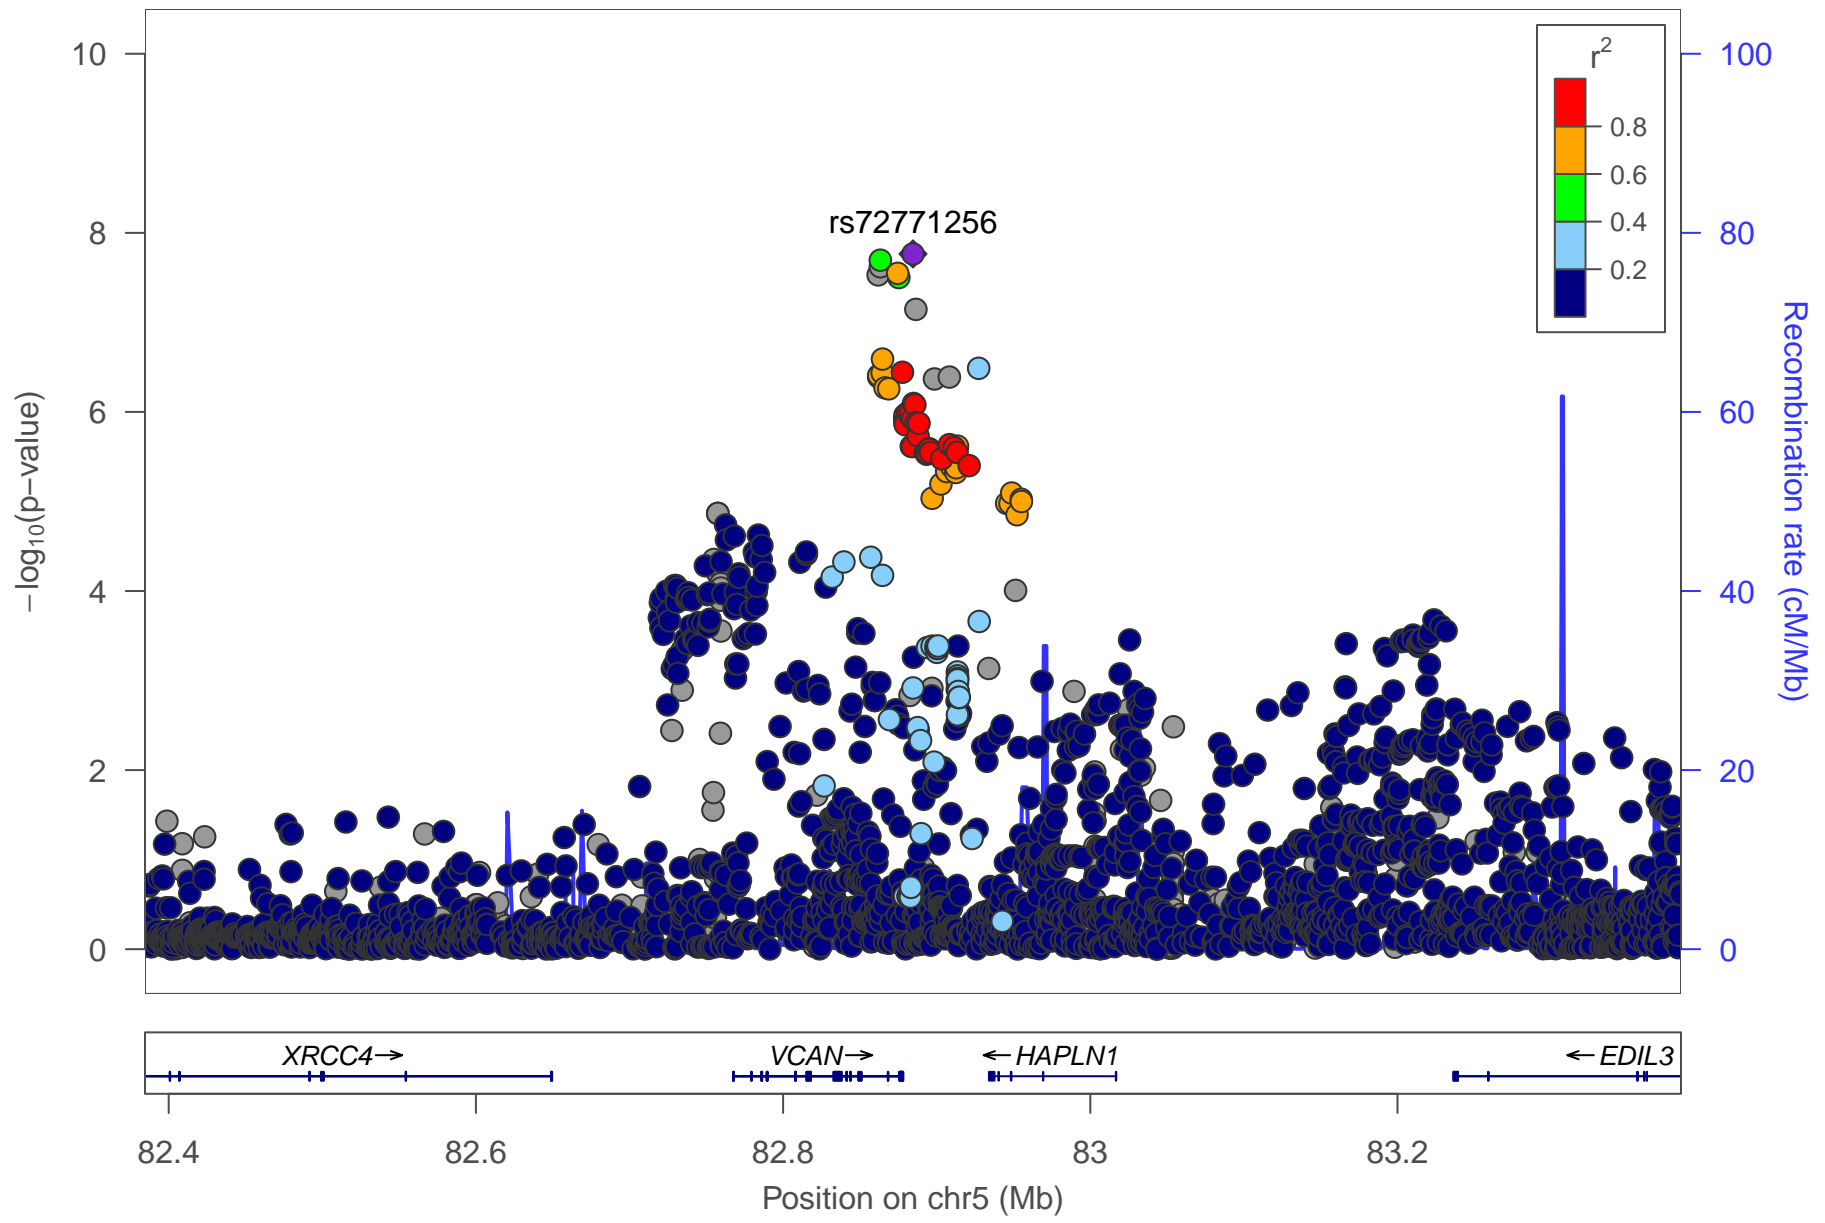

Plotted SNPs

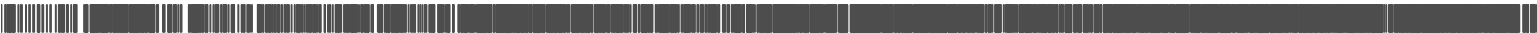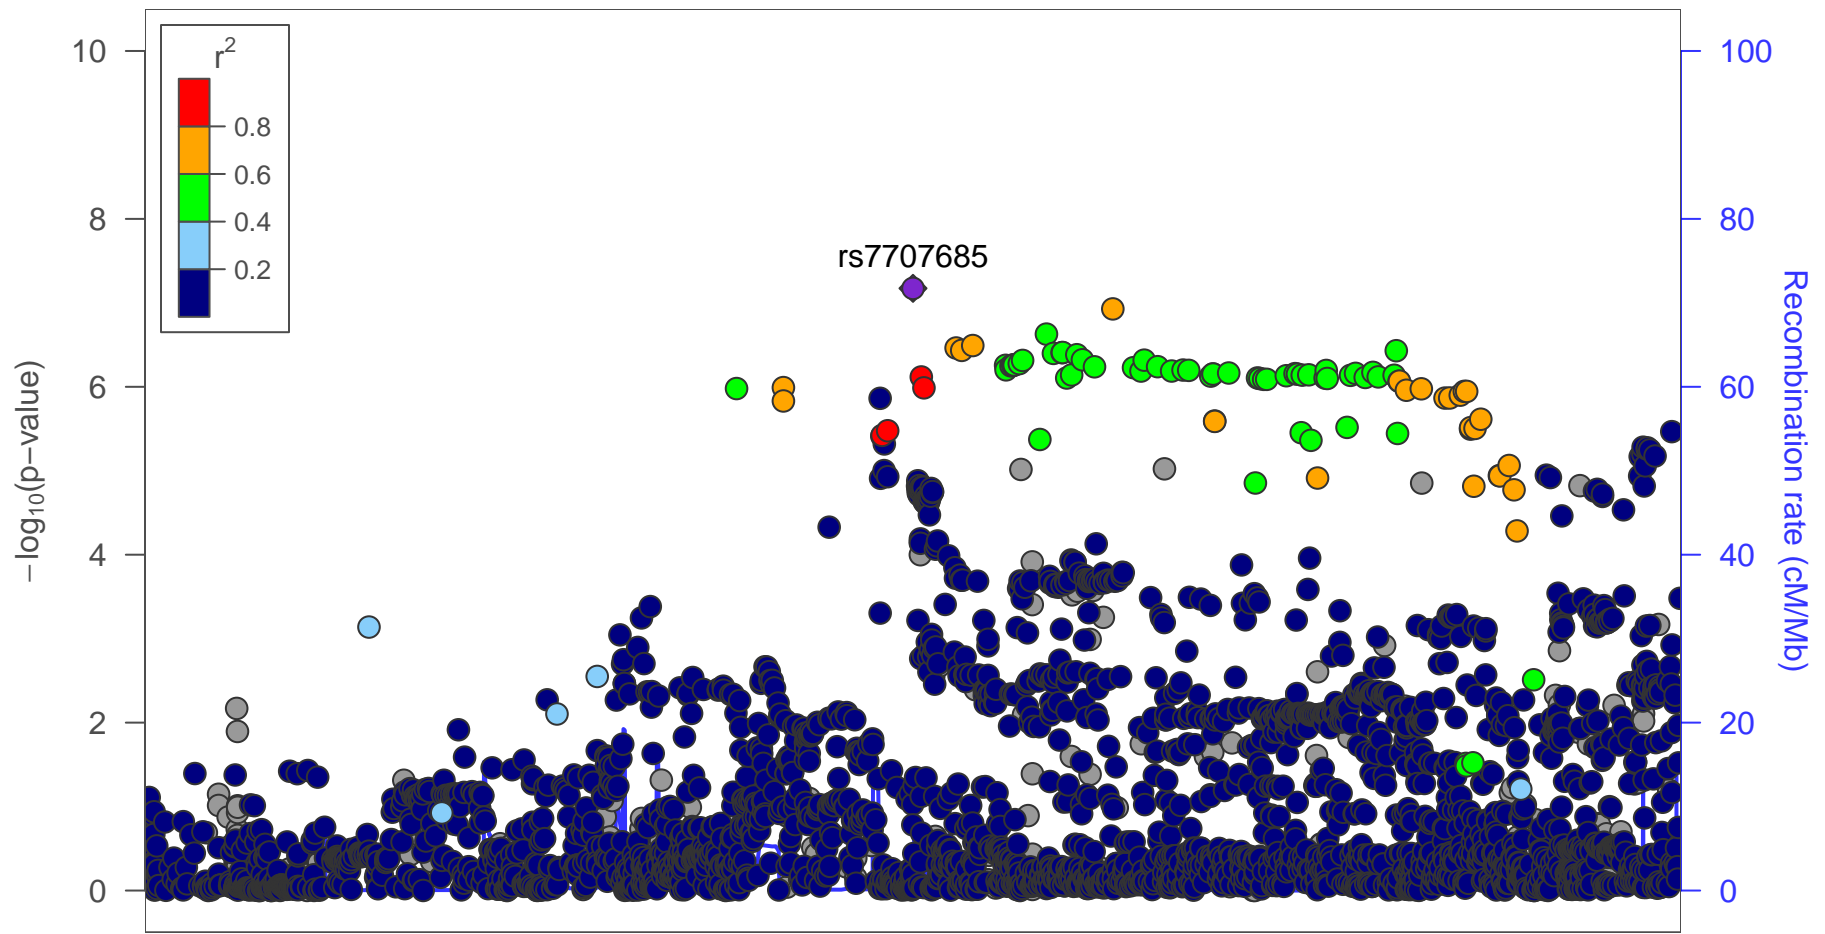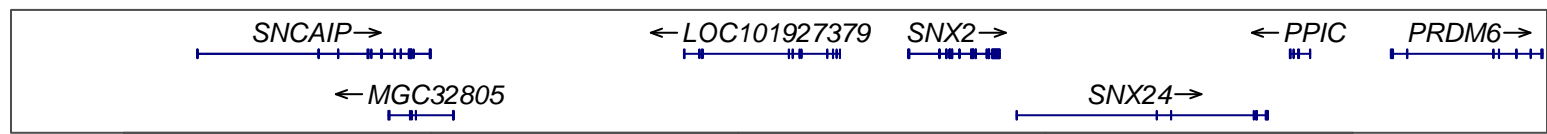

121.6                      121.8                      122                      122.2                      122.4

Position on chr5 (Mb)

Plotted SNPs

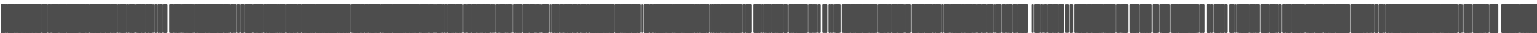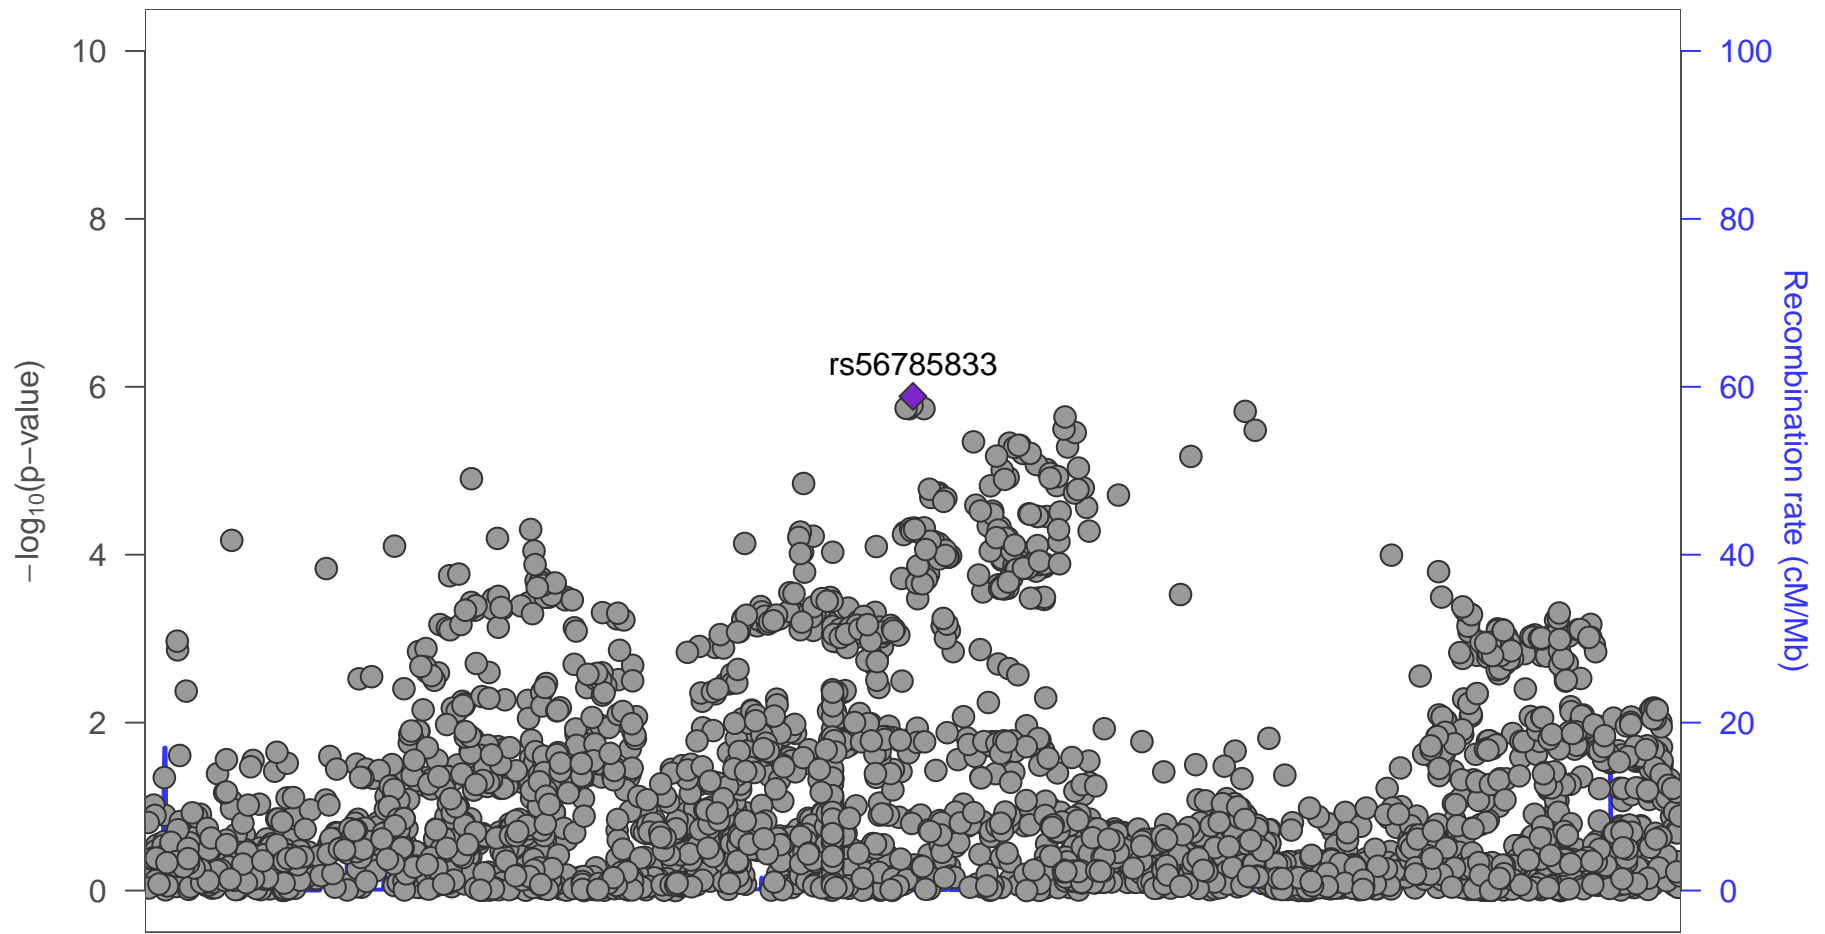

rs56785833

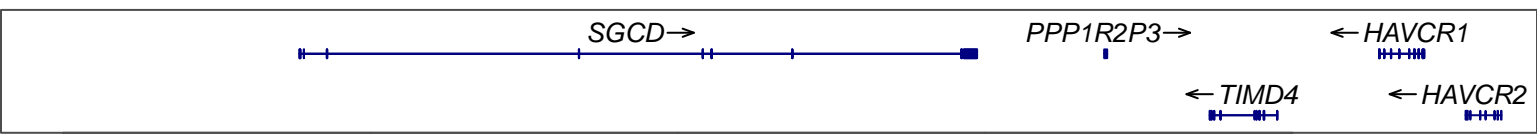

155.6                      155.8                      156                      156.2                      156.4

Position on chr5 (Mb)

Plotted SNPs

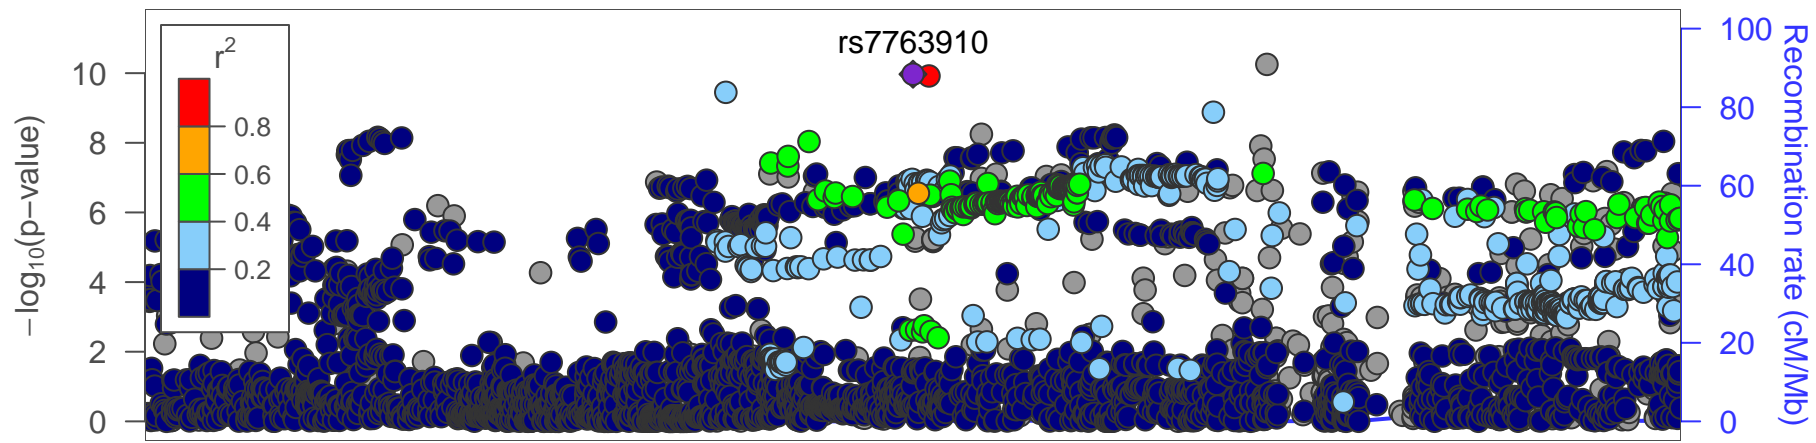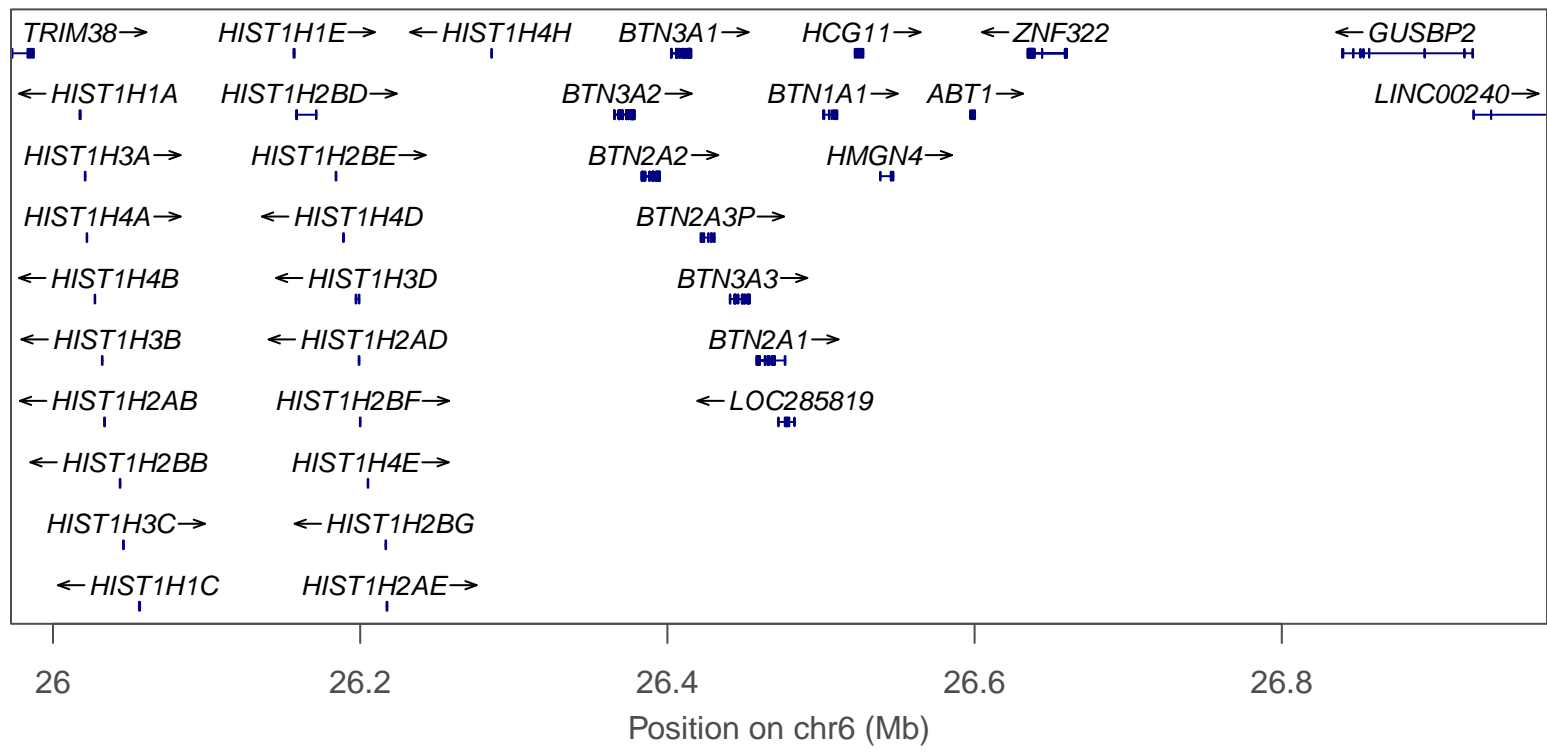

13 genes omitted

Plotted SNPs

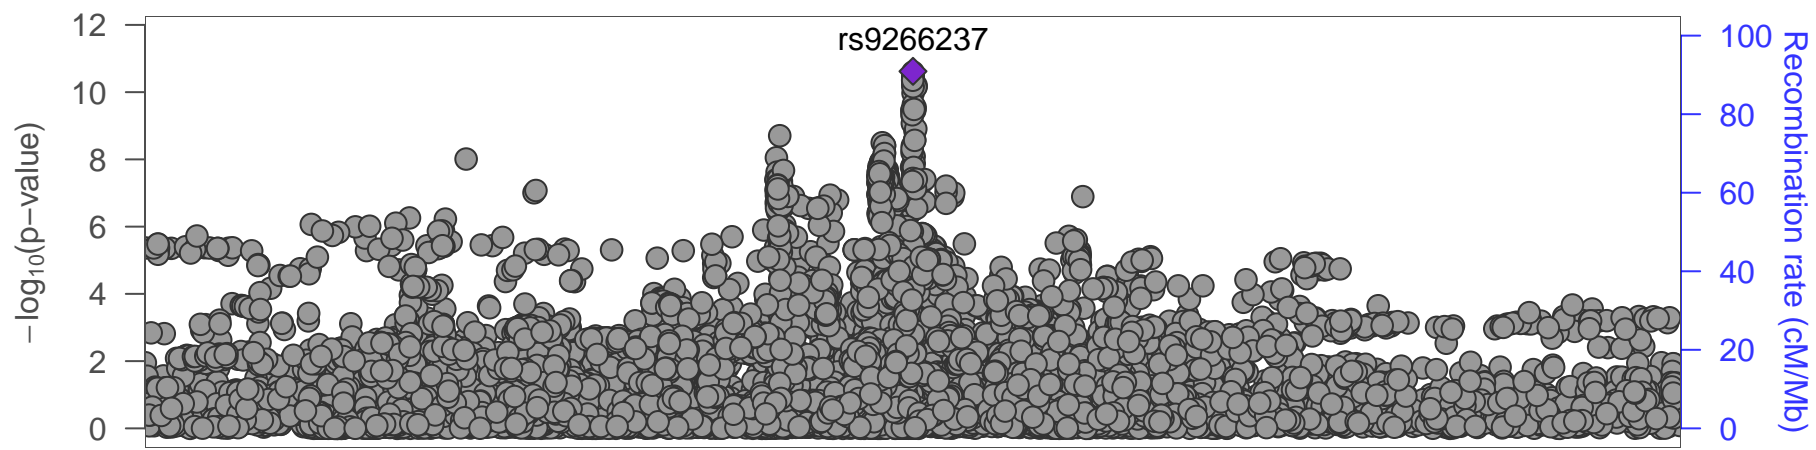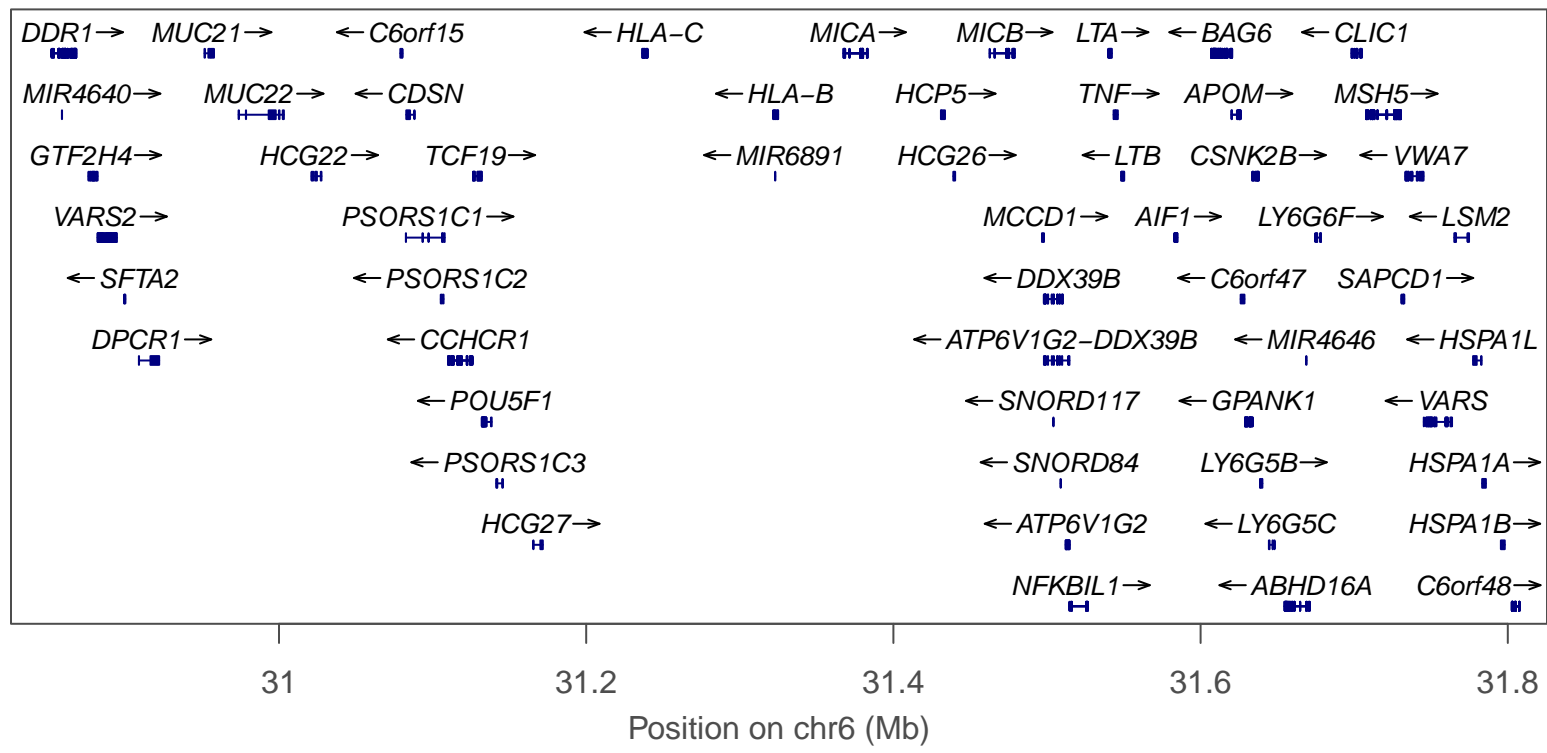

Plotted SNPs

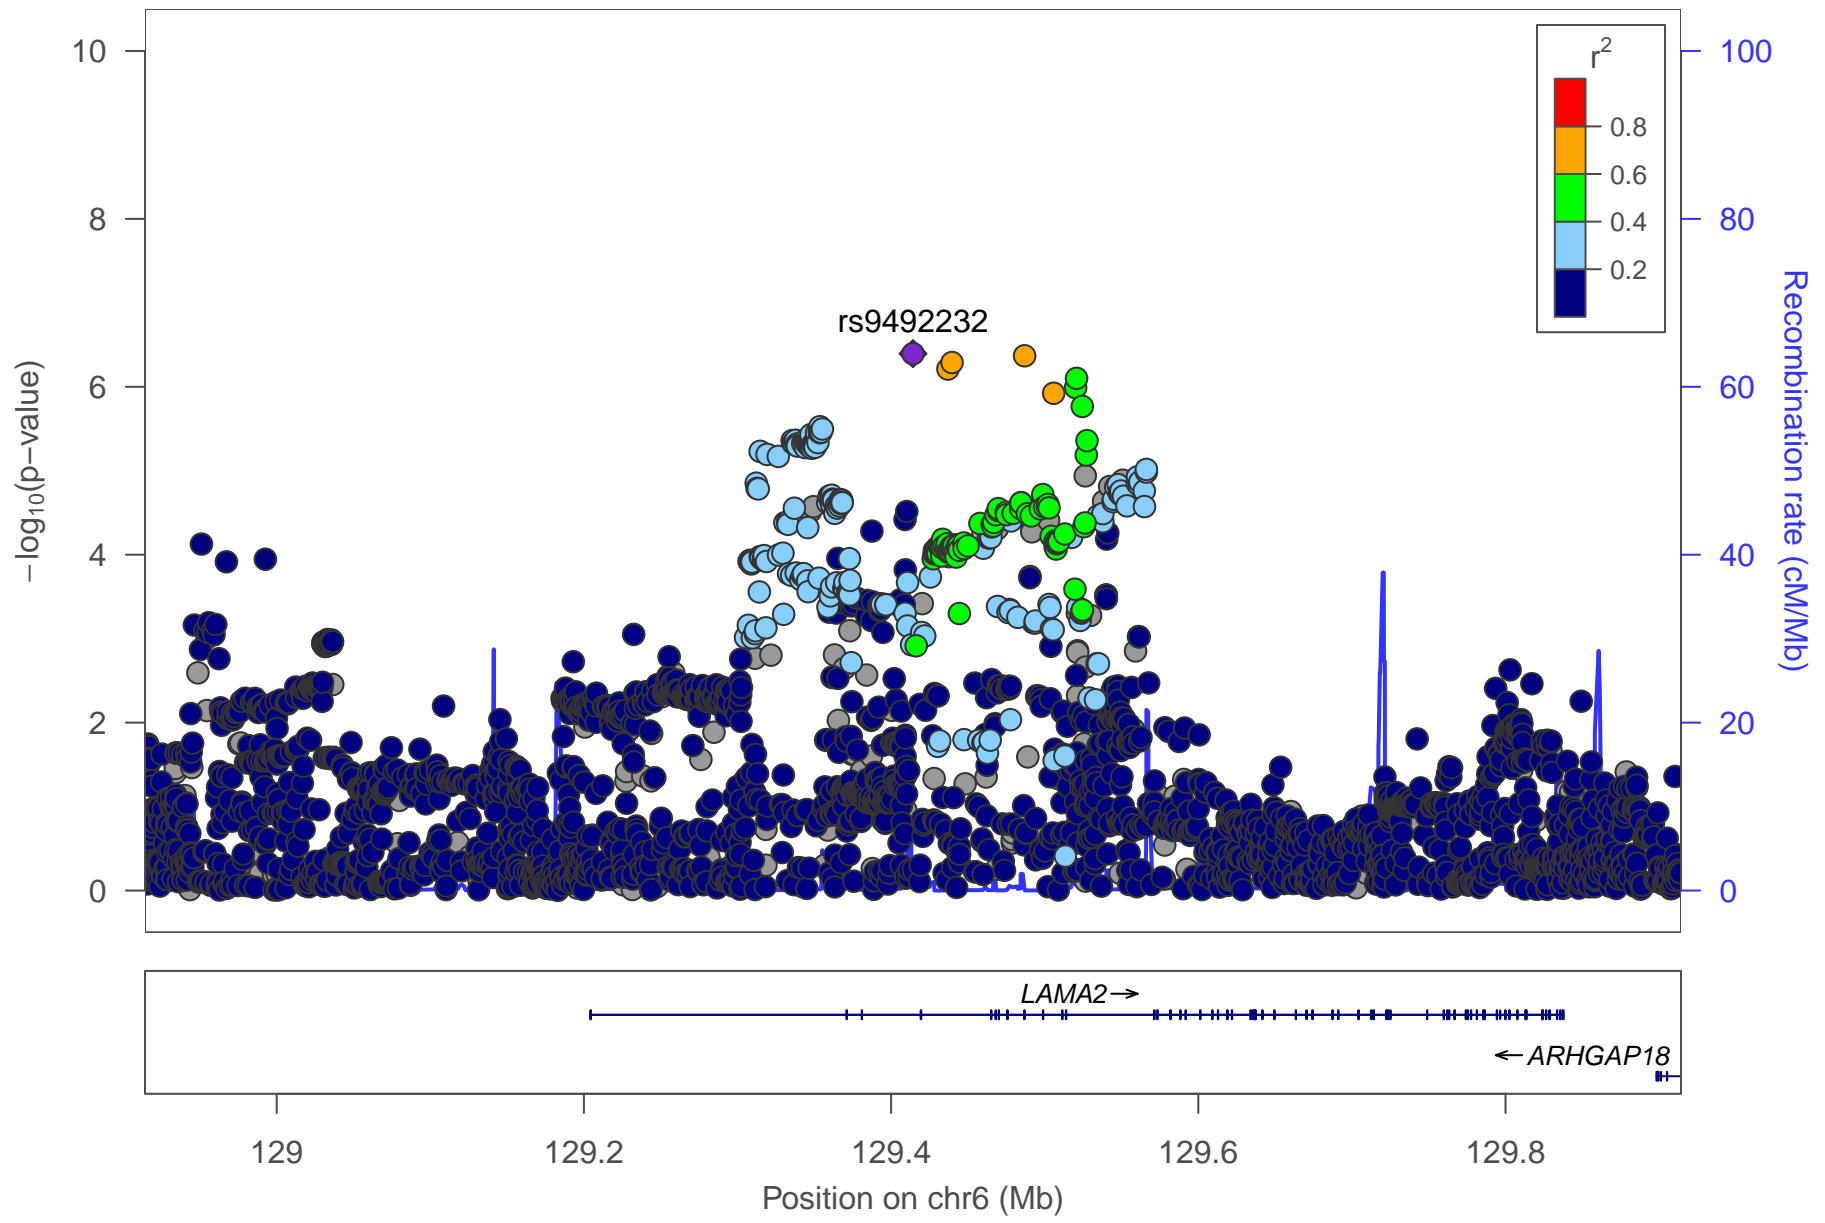

Plotted SNPs

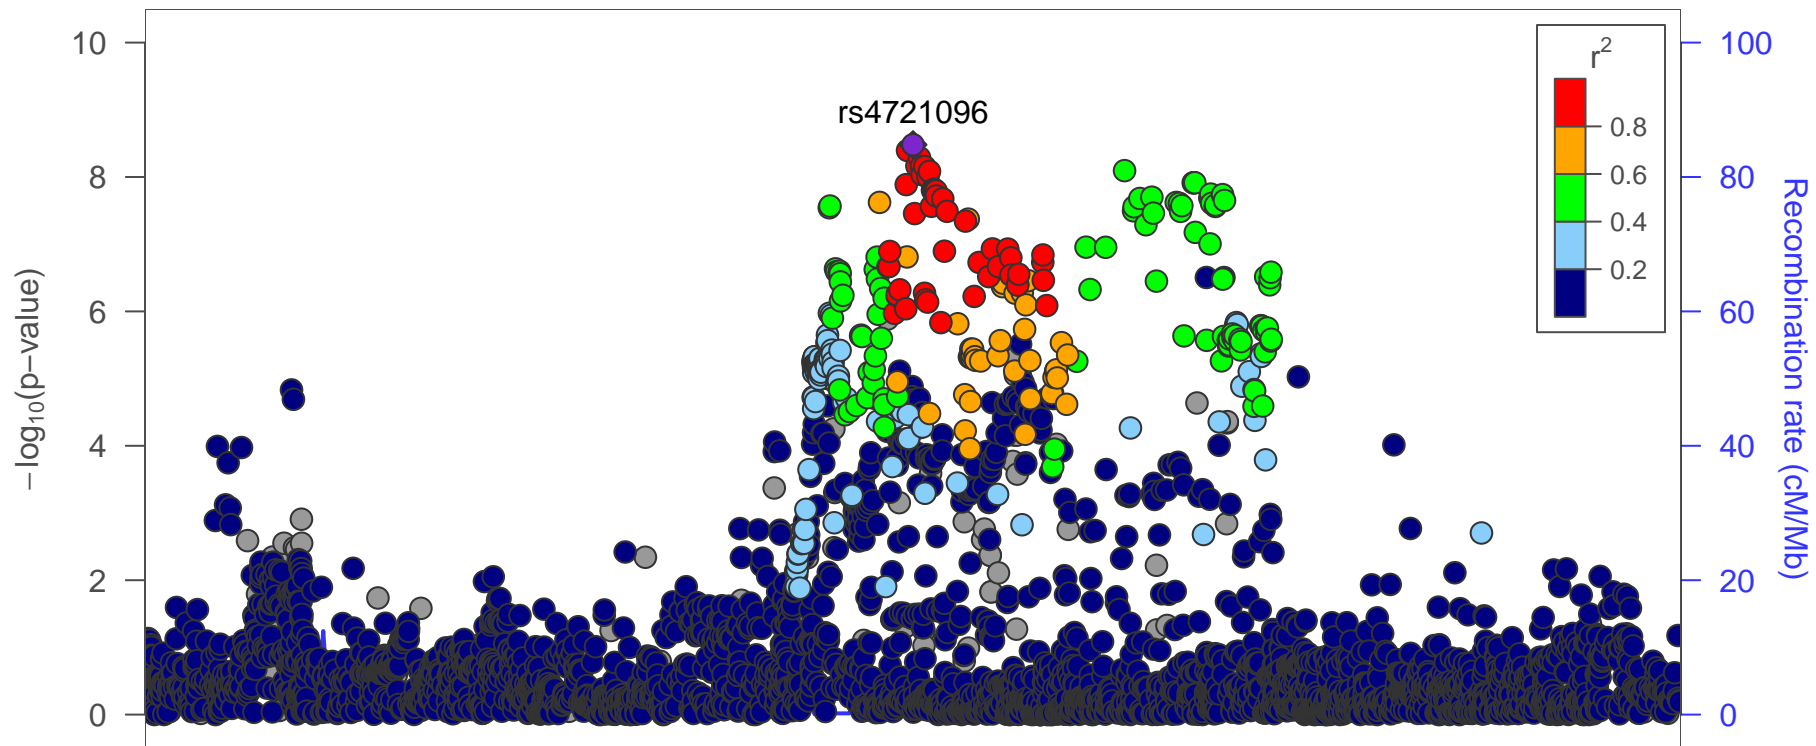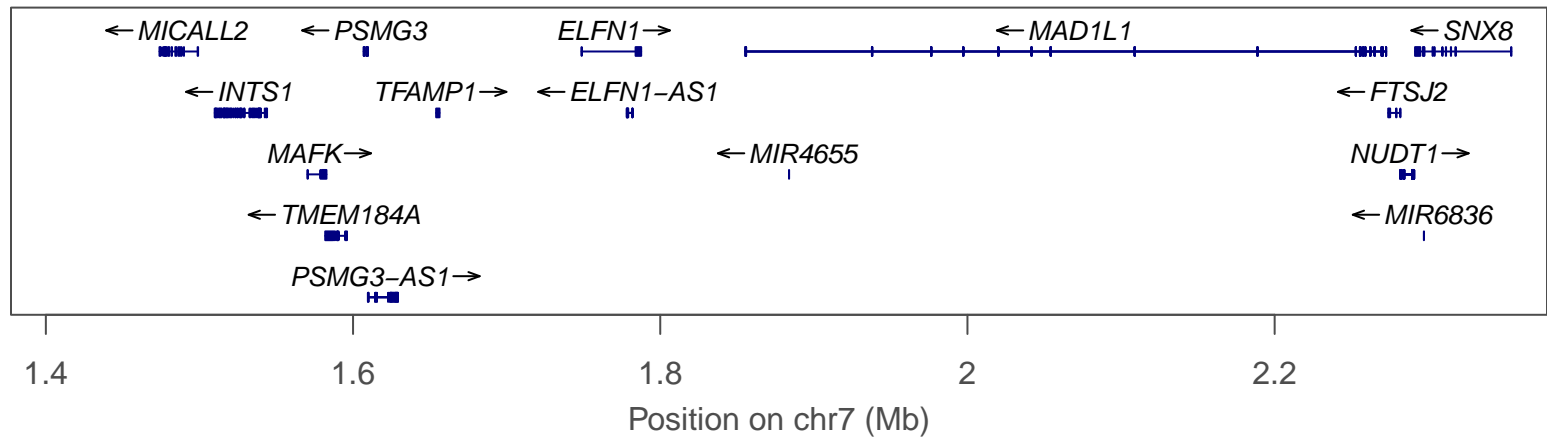

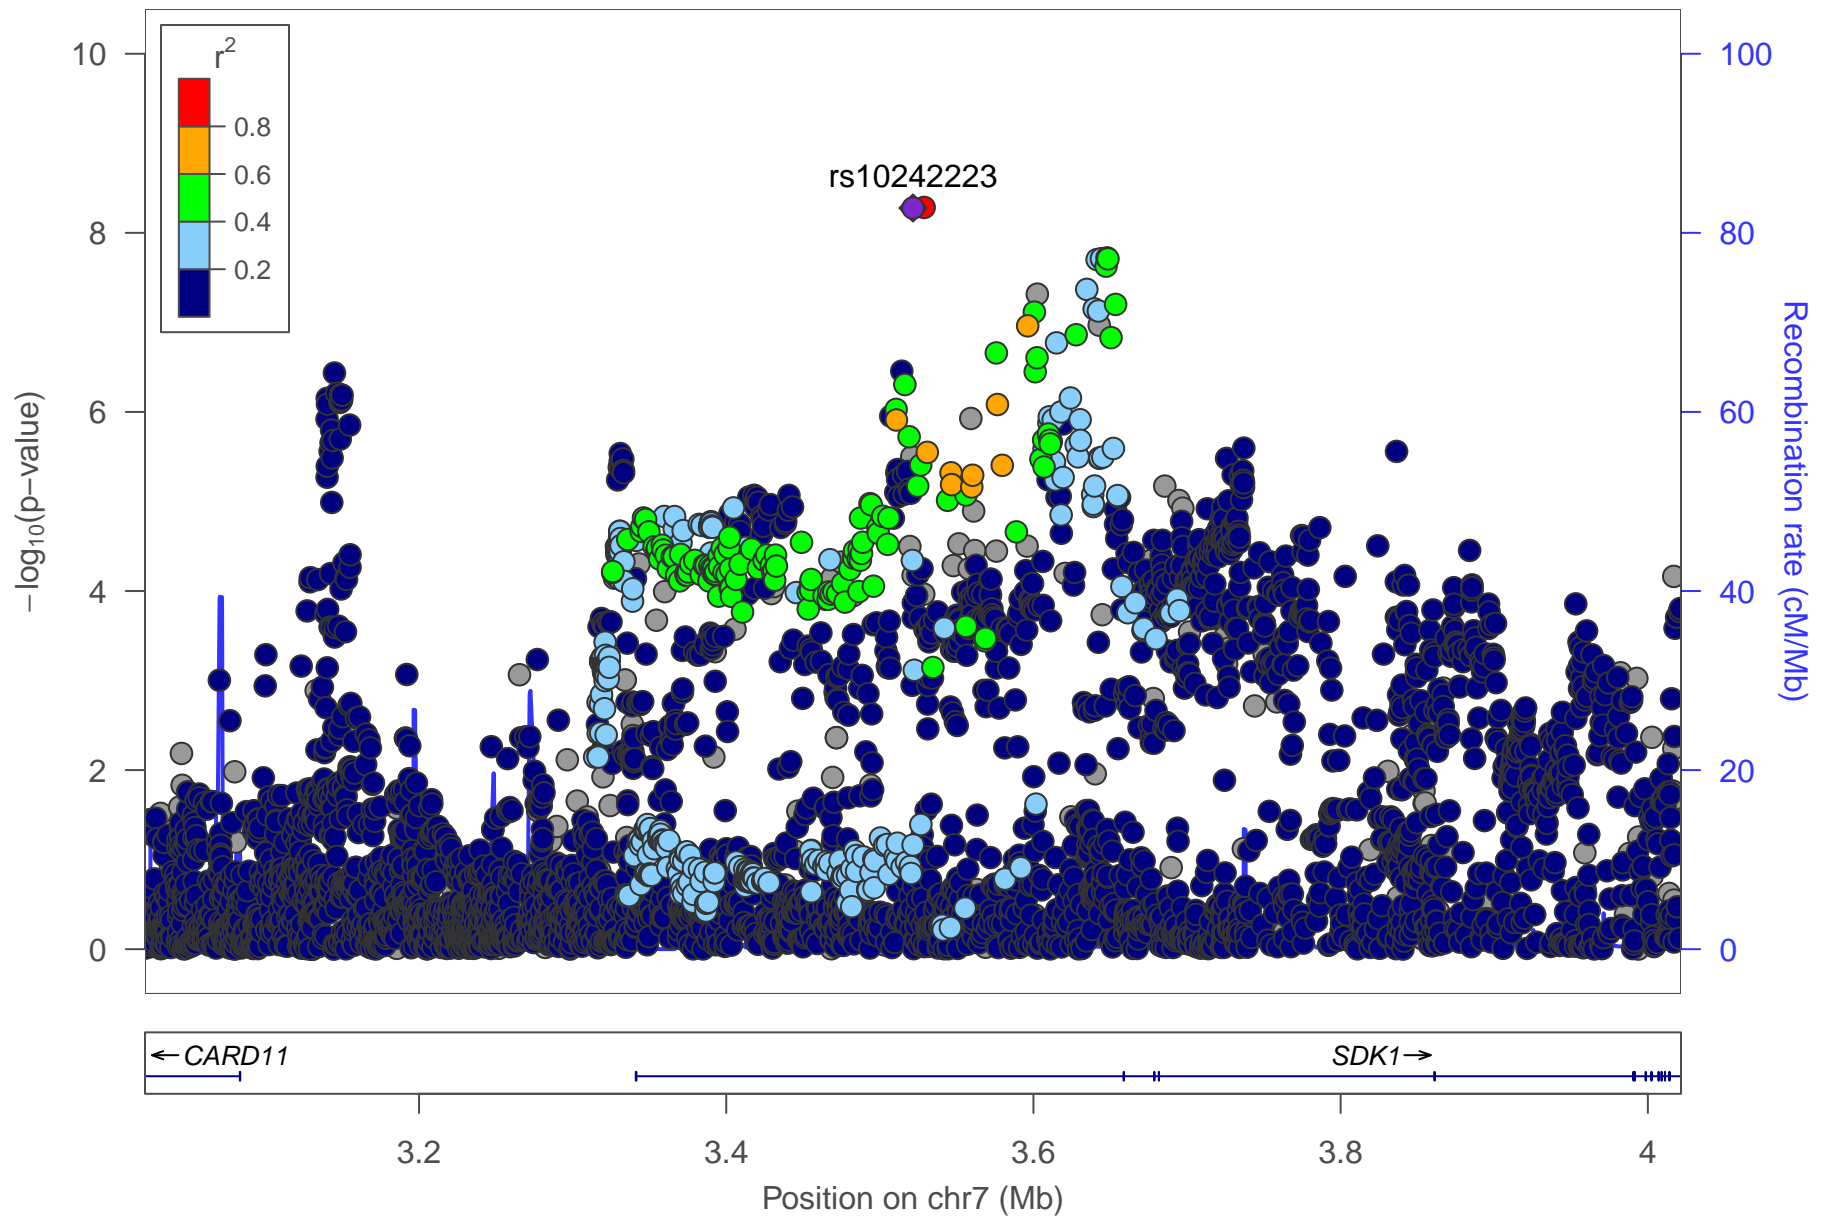



Plotted SNPs

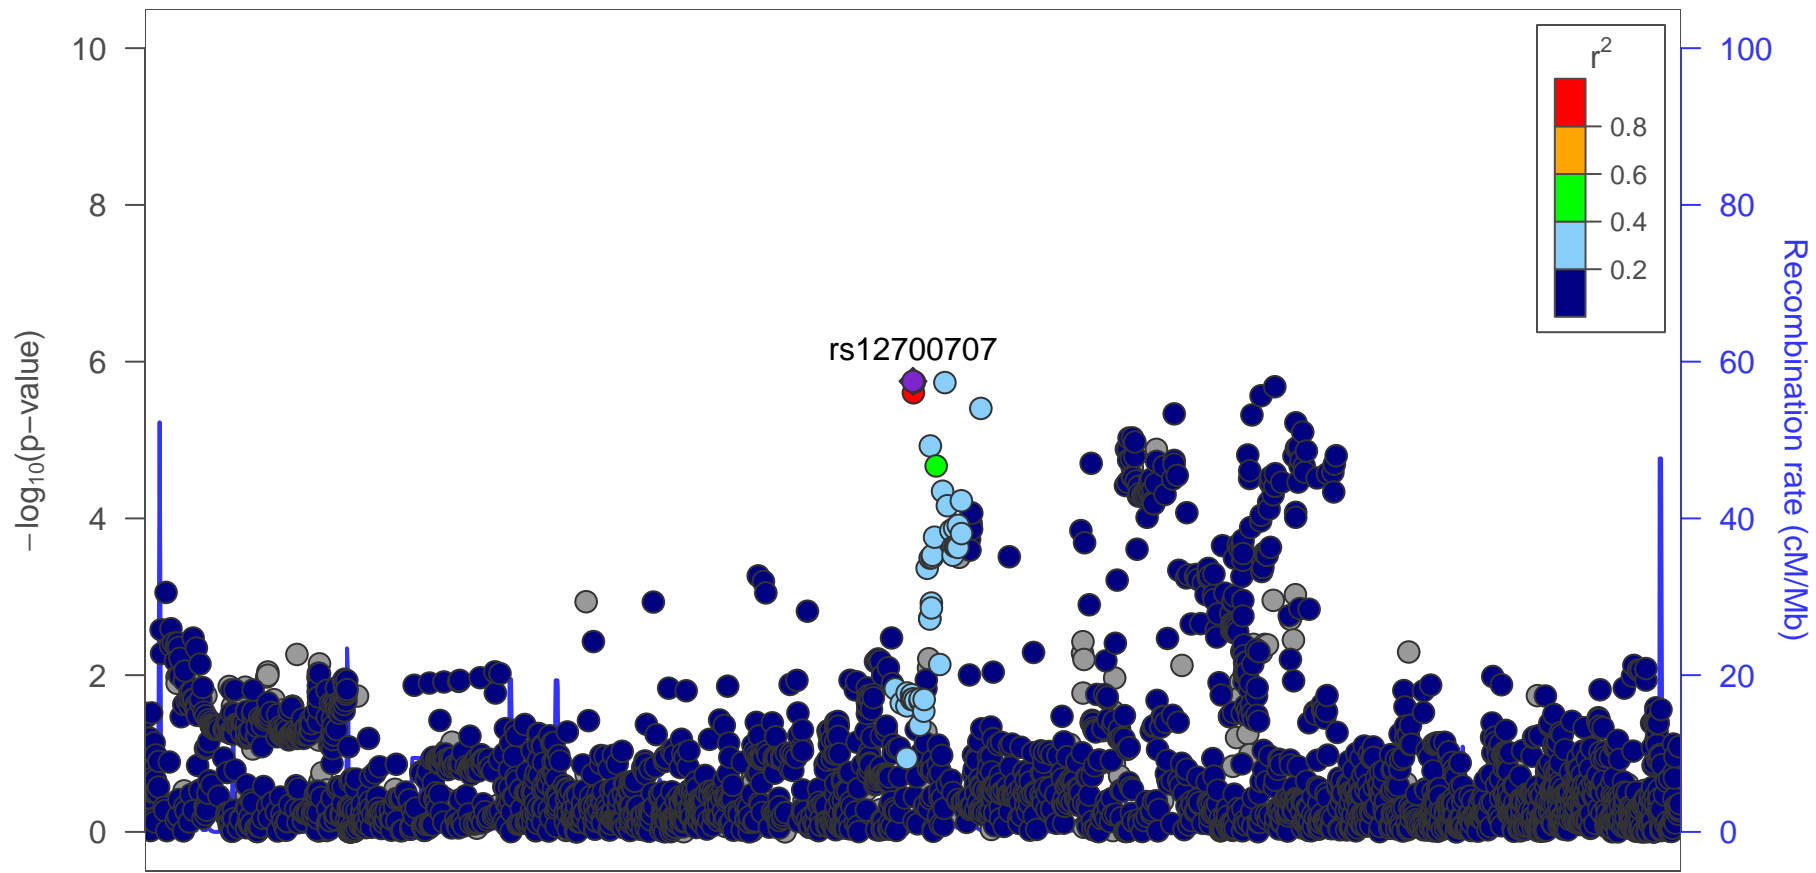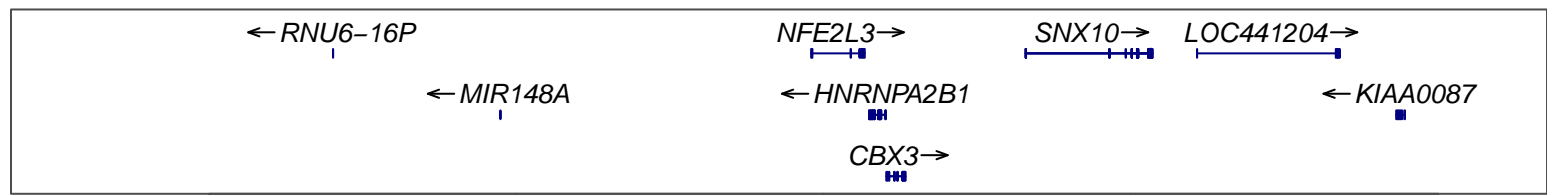

25.8                      26                      26.2                      26.4                      26.6

Position on chr7 (Mb)

Plotted SNPs

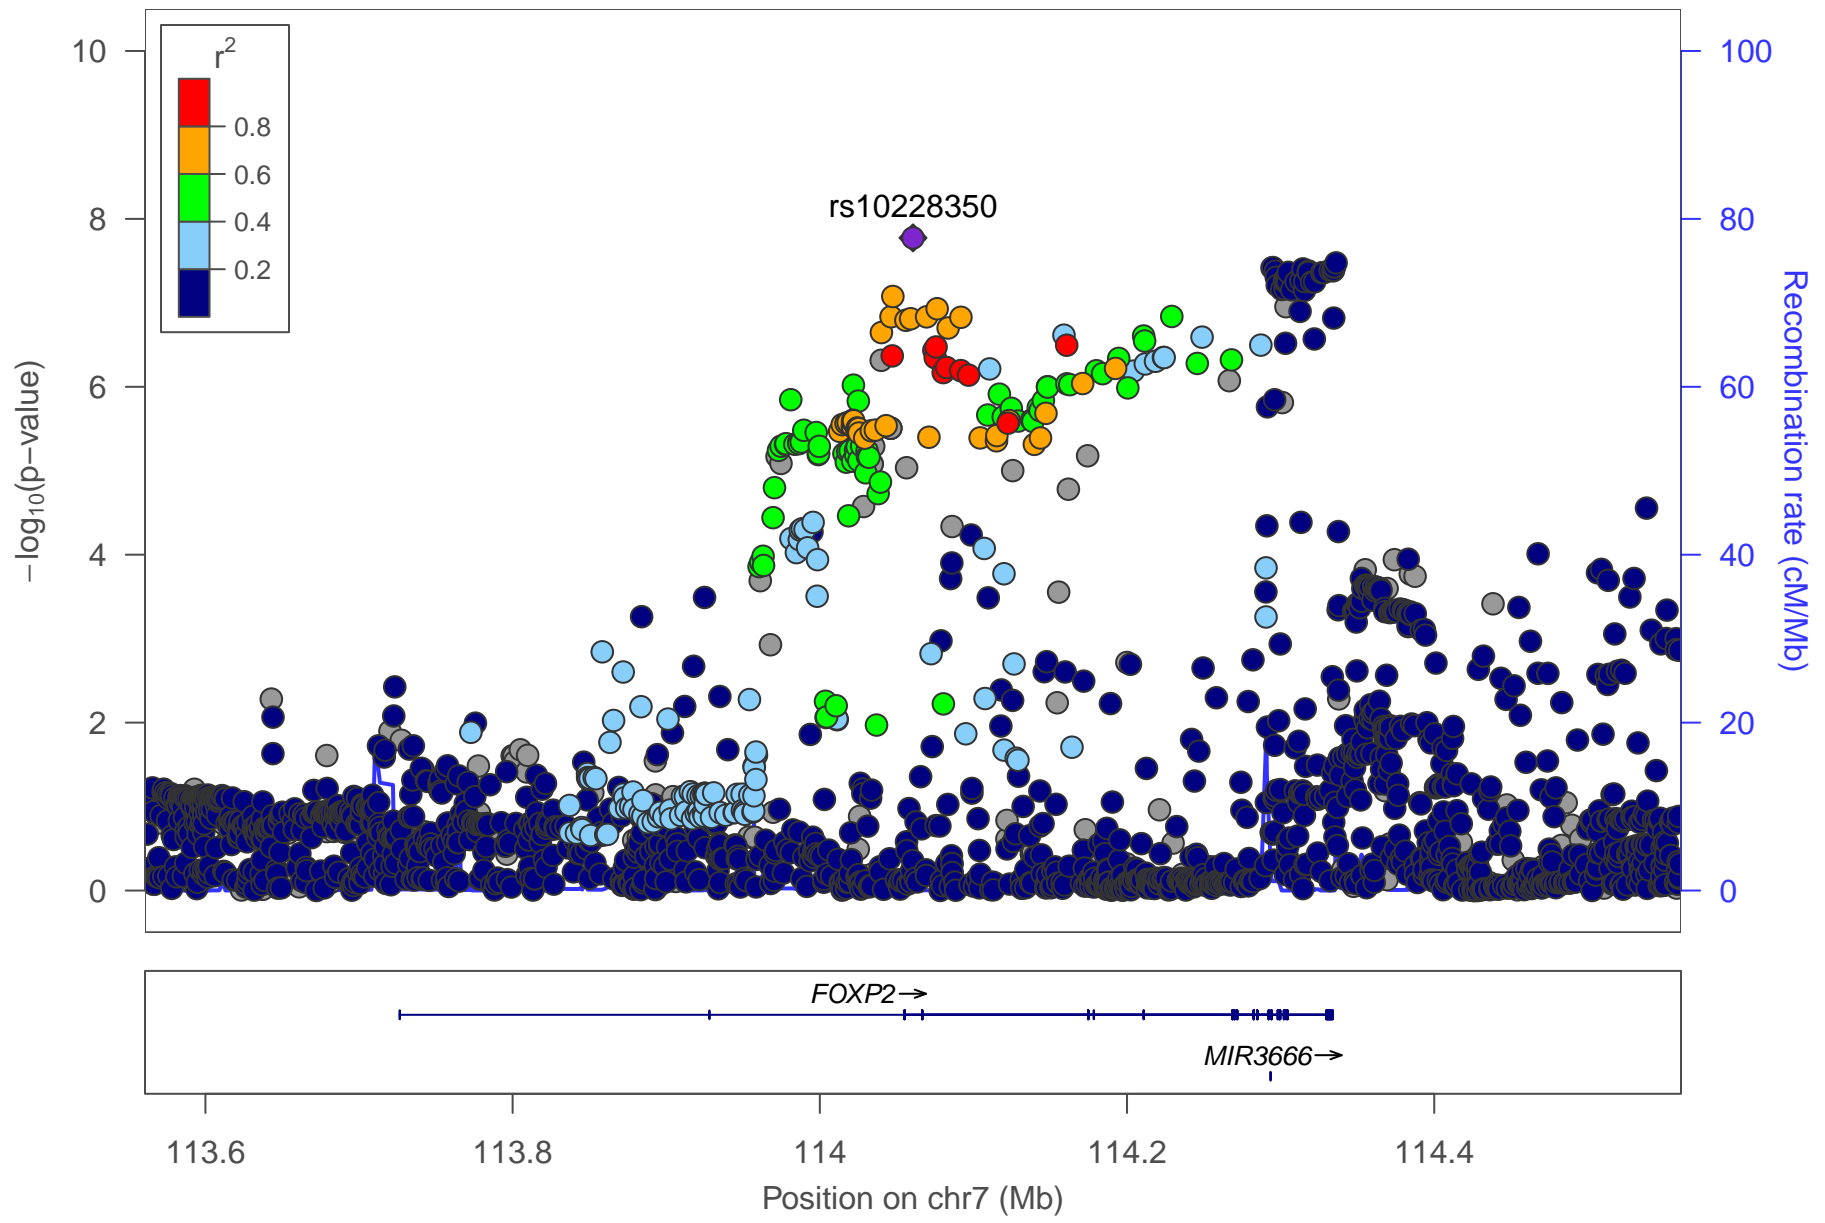

Plotted SNPs

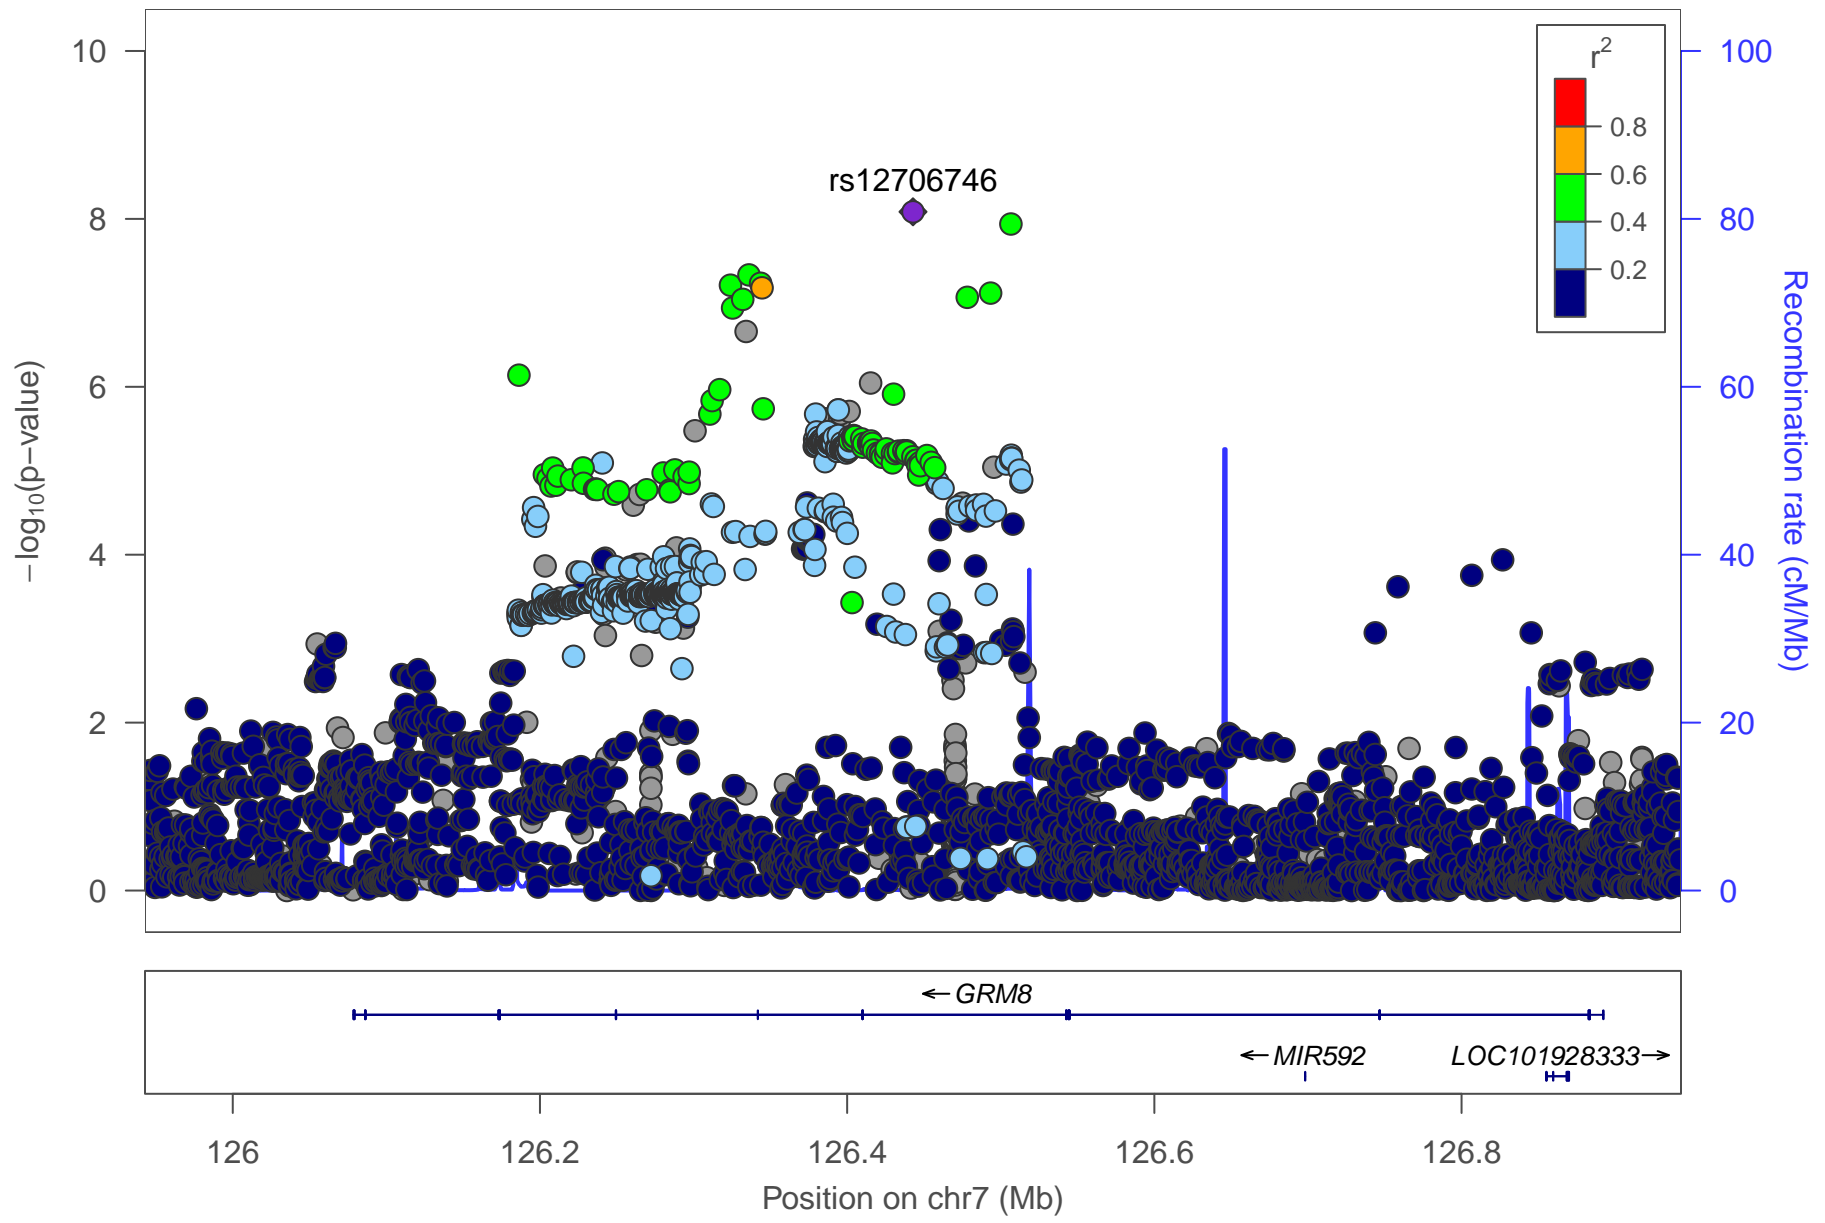

Plotted SNPs

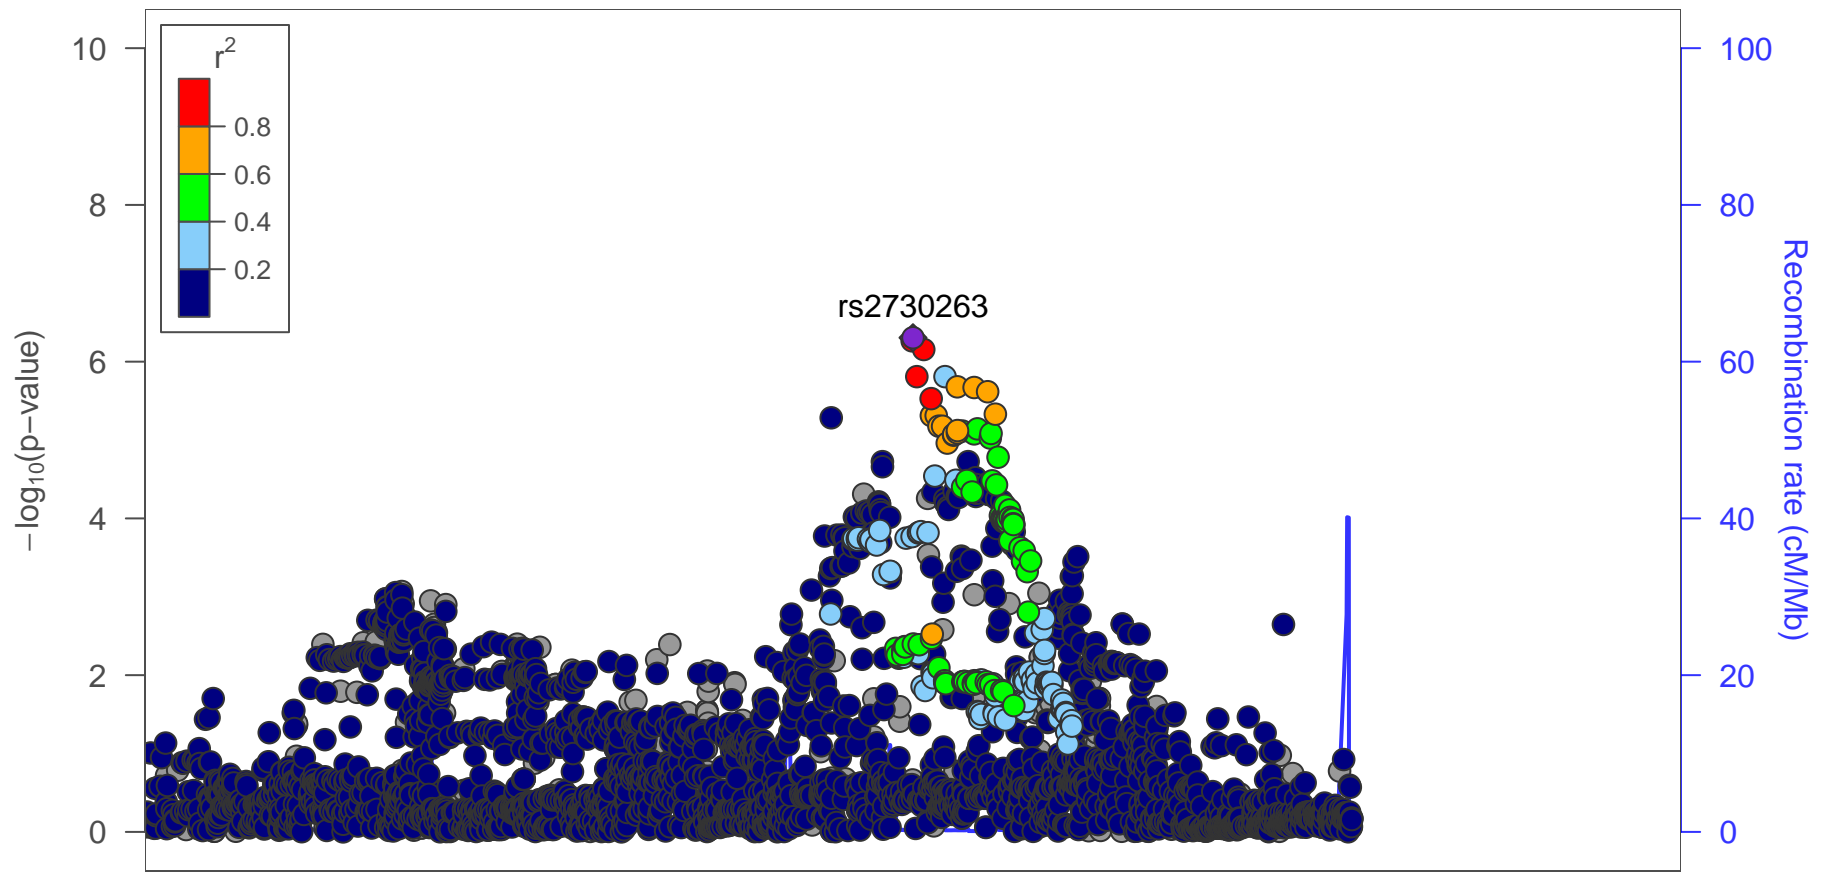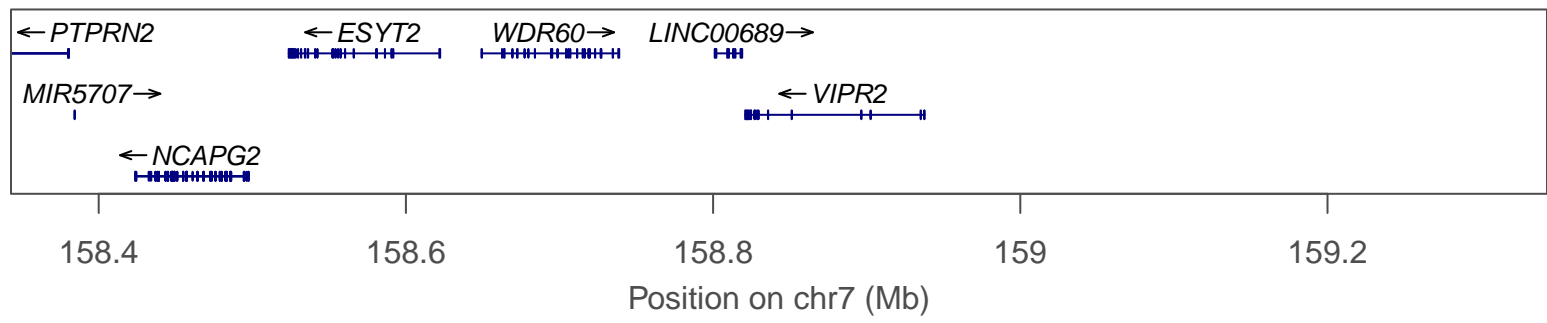

Plotted SNPs

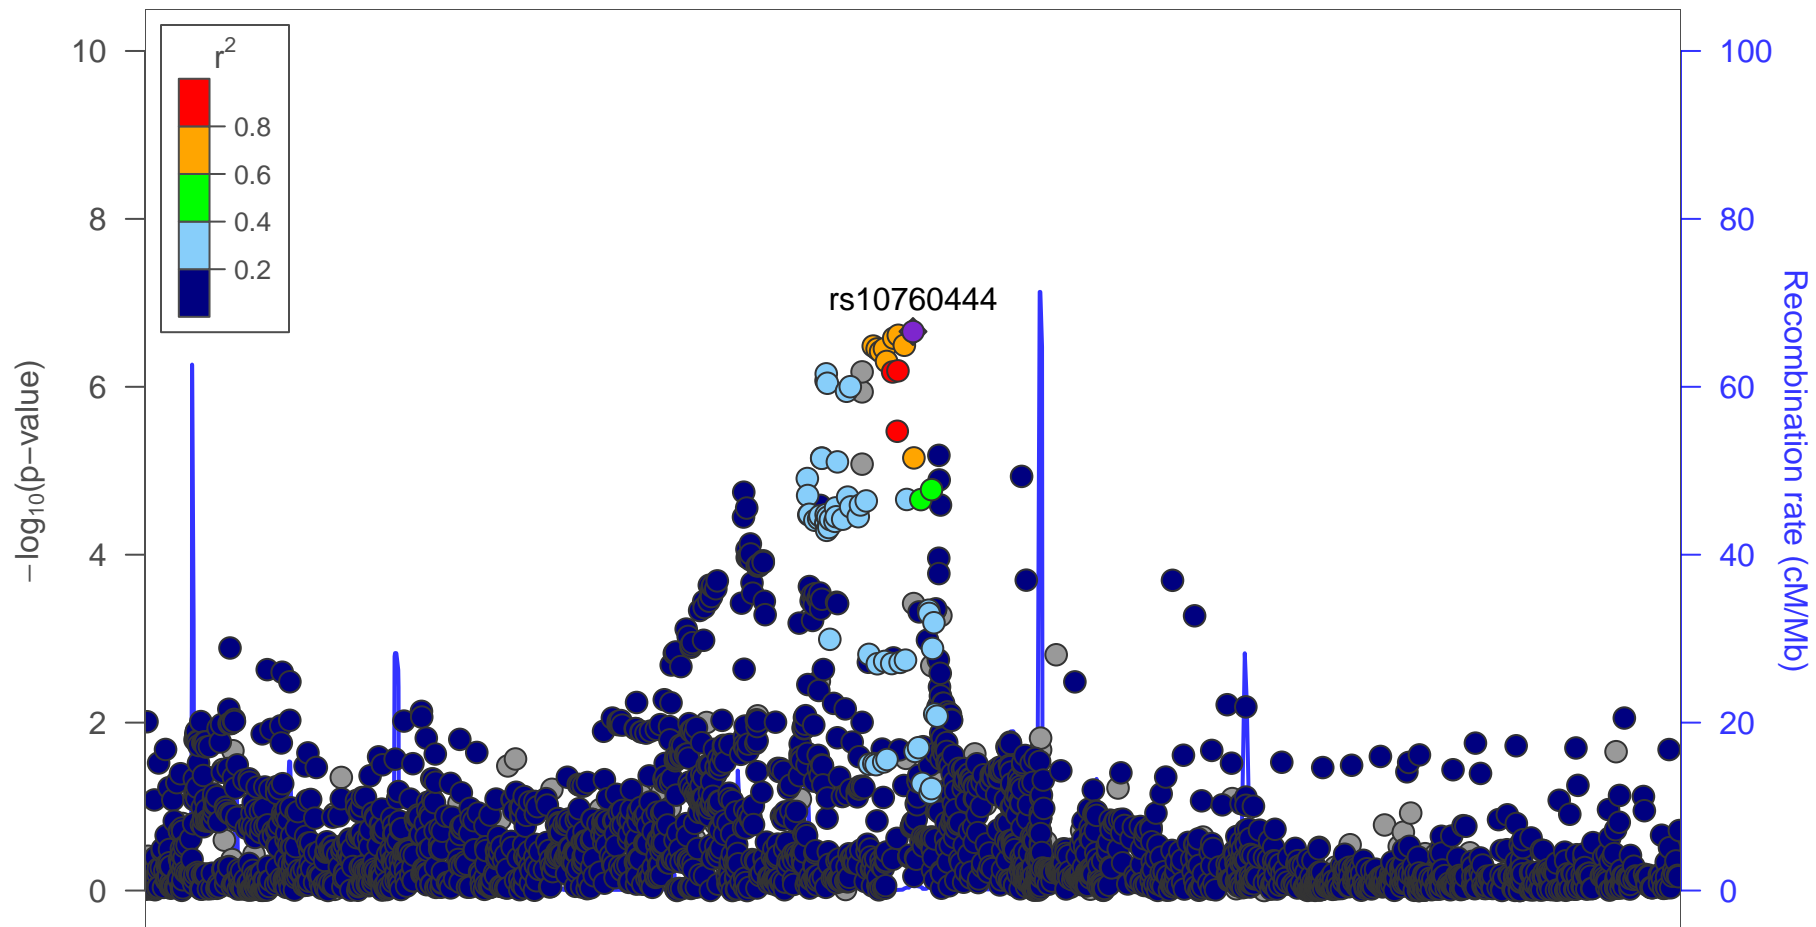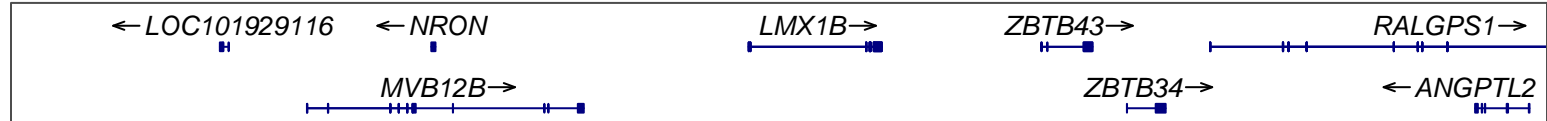

129 129.2 129.4 129.6 129.8

Position on chr9 (Mb)

Plotted SNPs

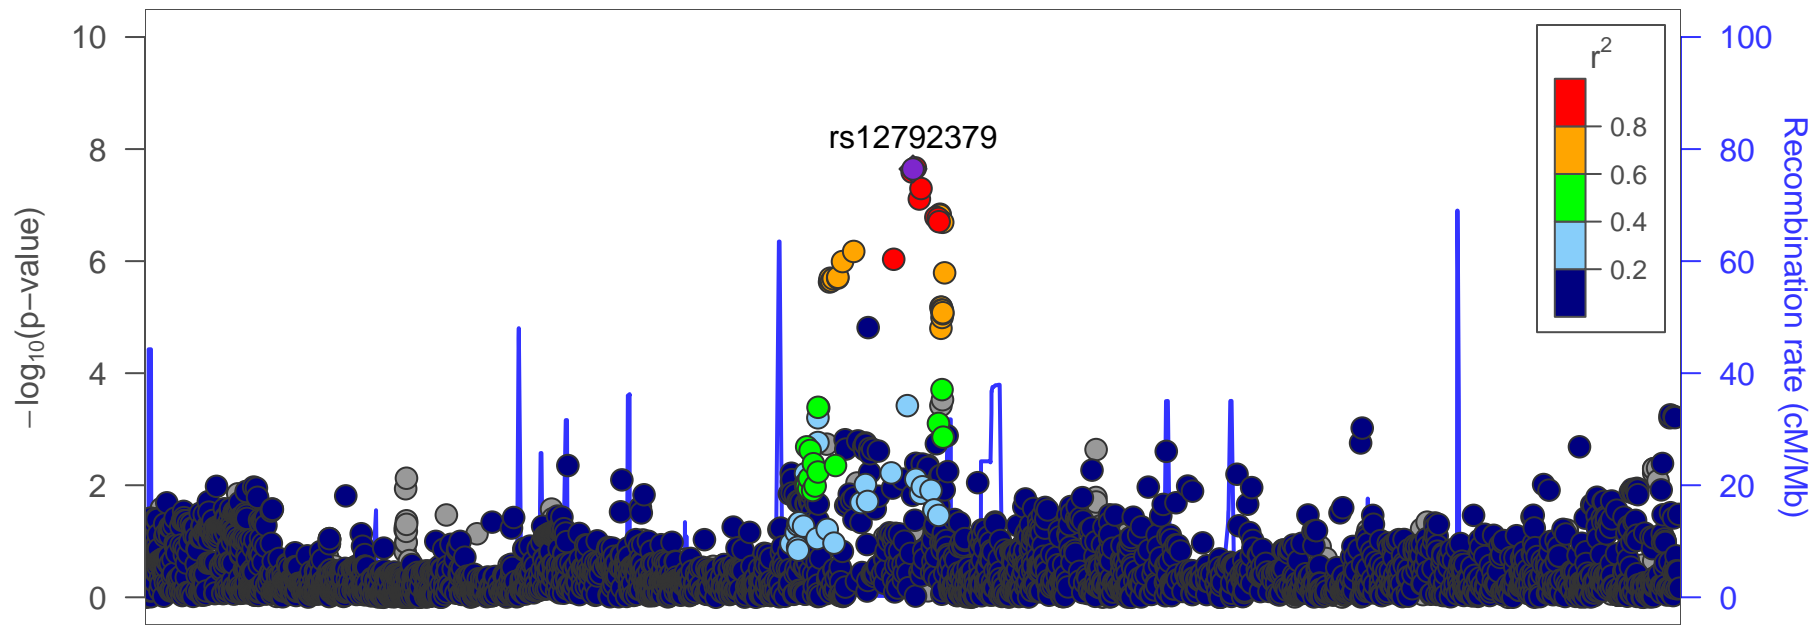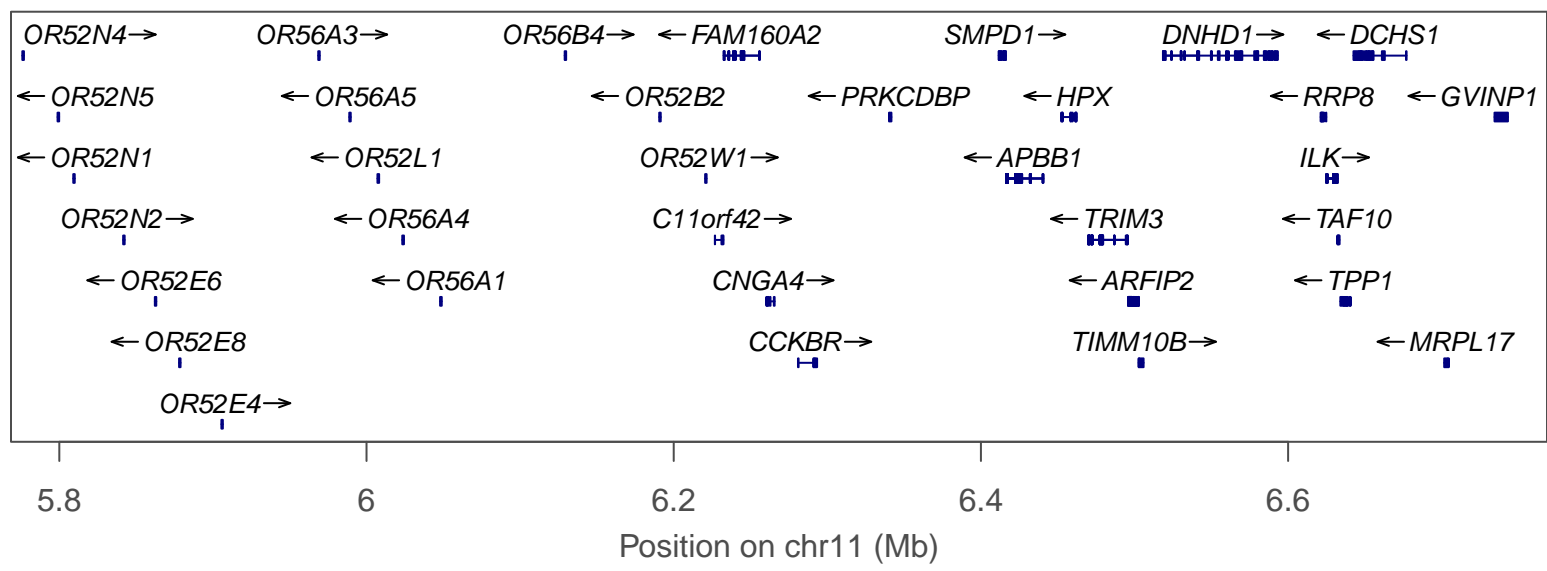

Plotted SNPs

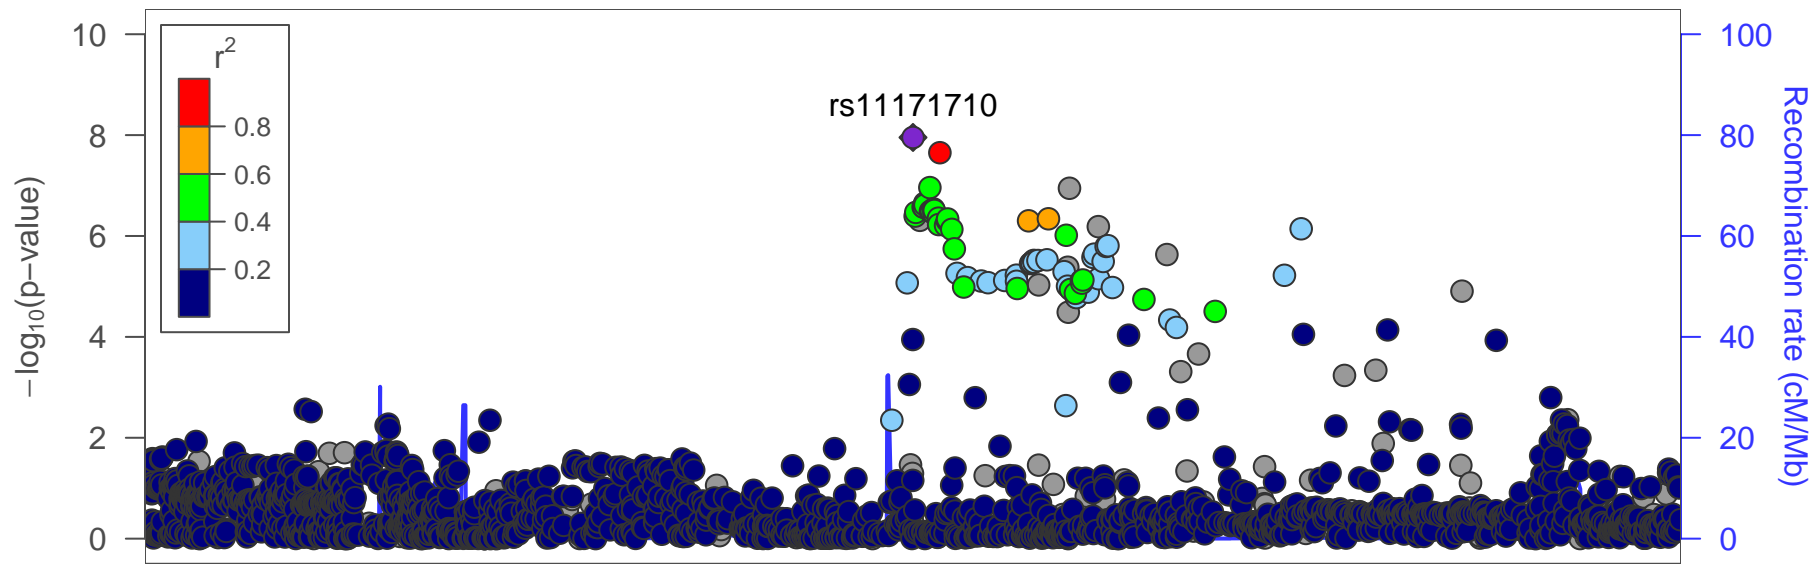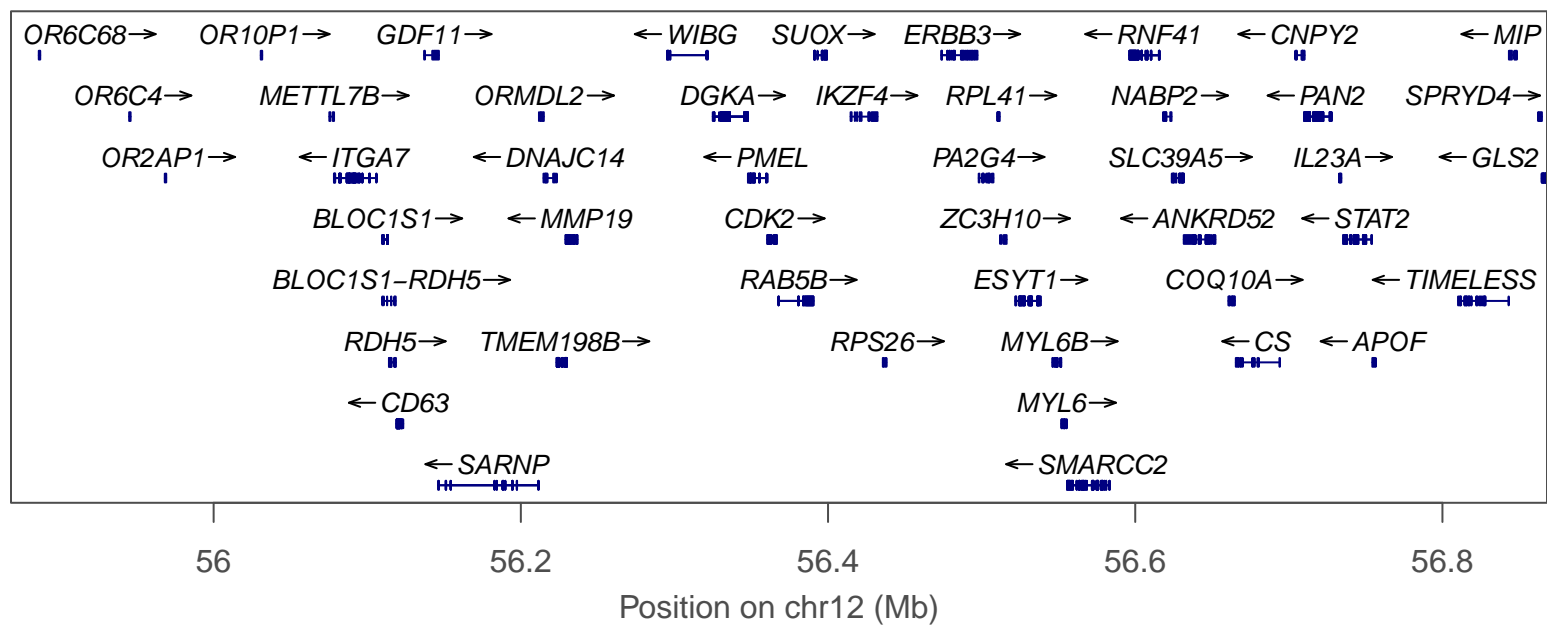

Plotted SNPs

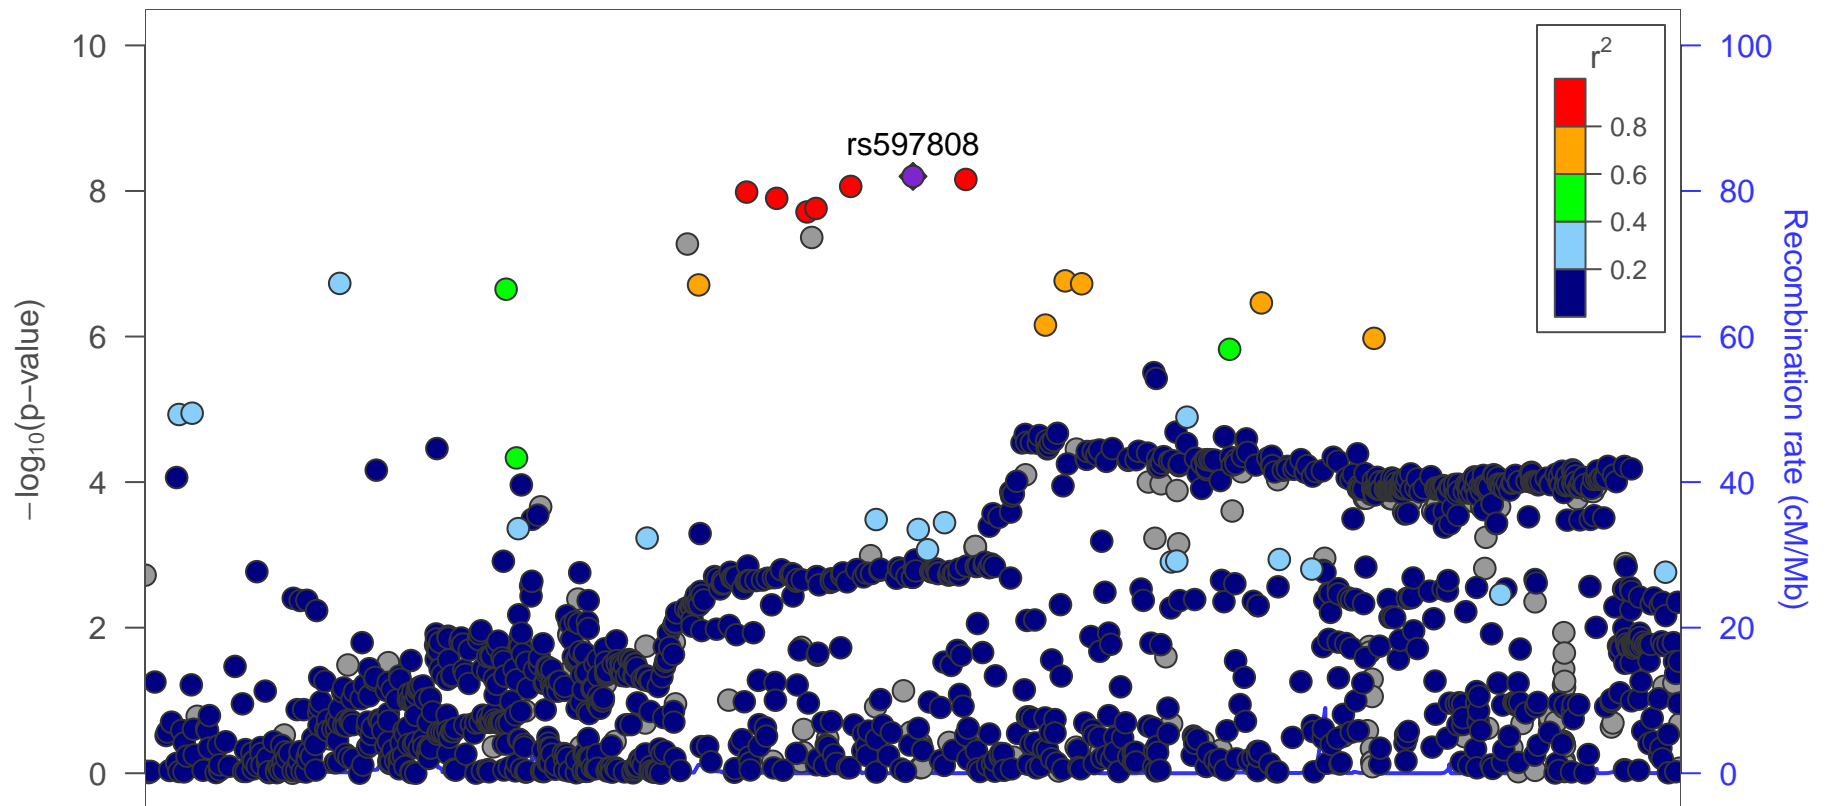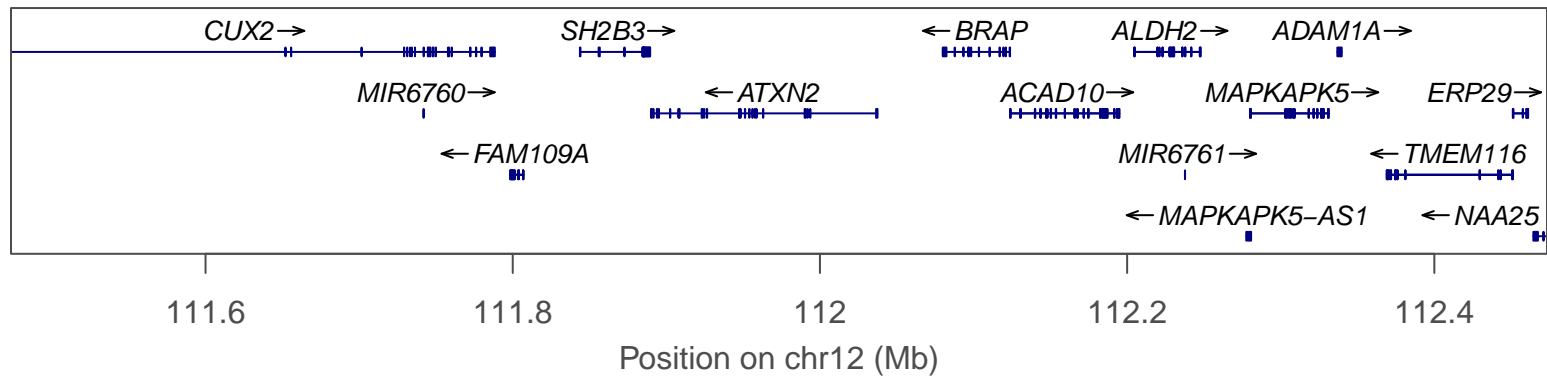



Plotted SNPs

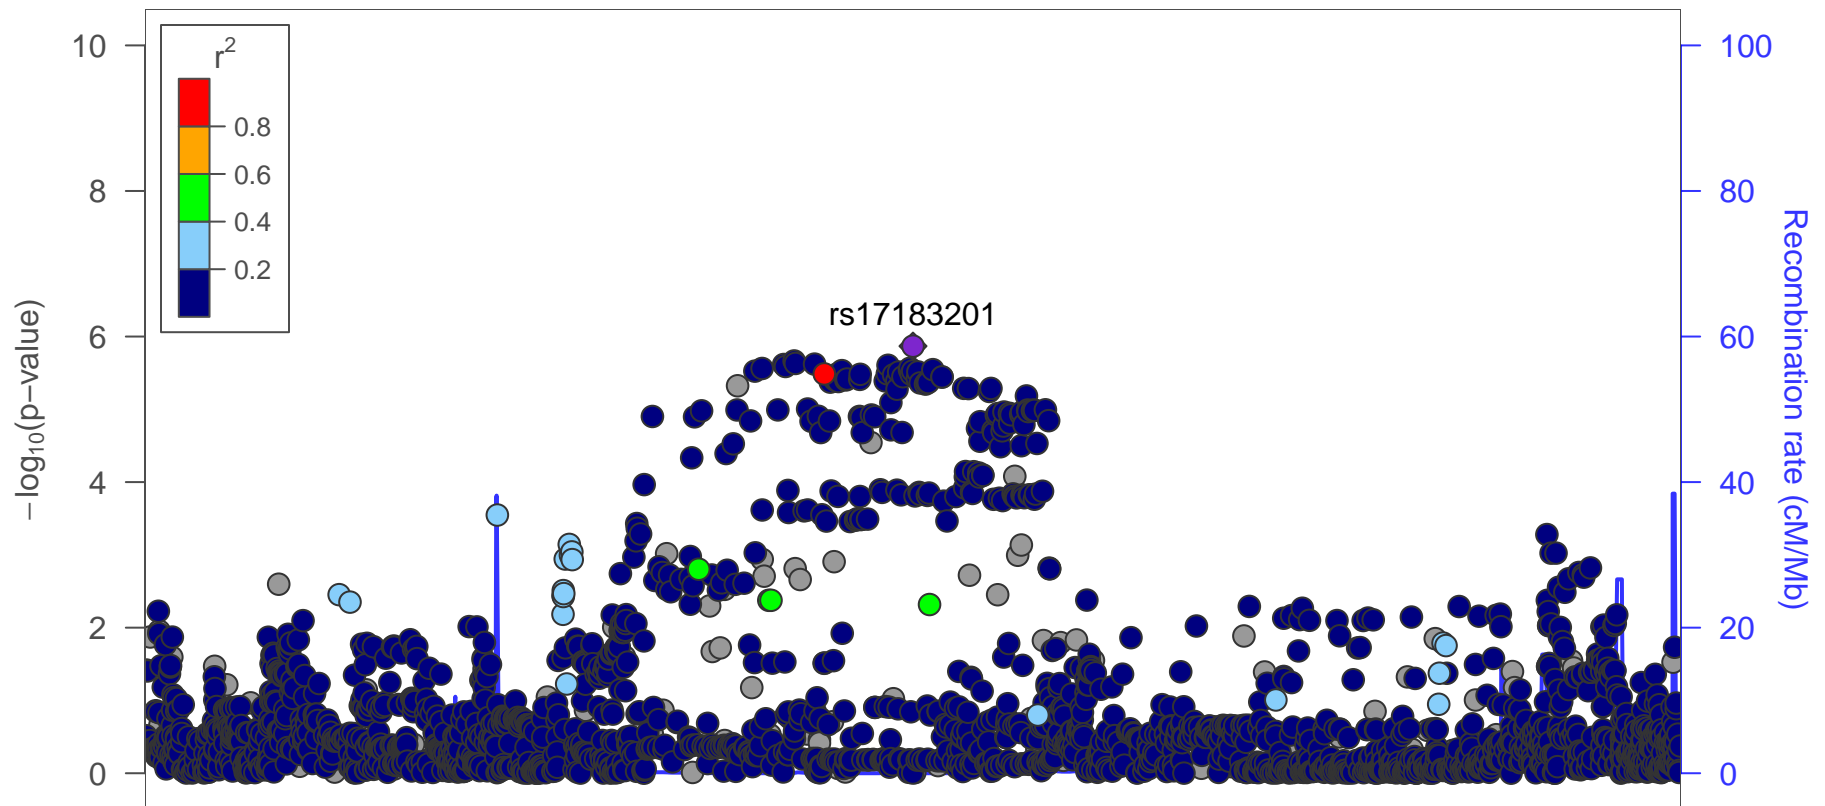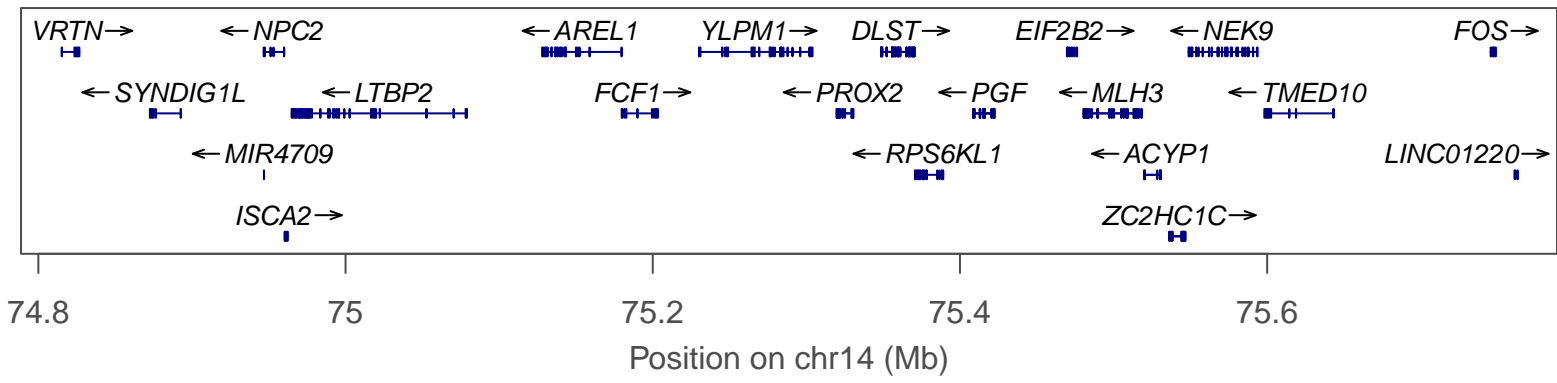

Plotted SNPs

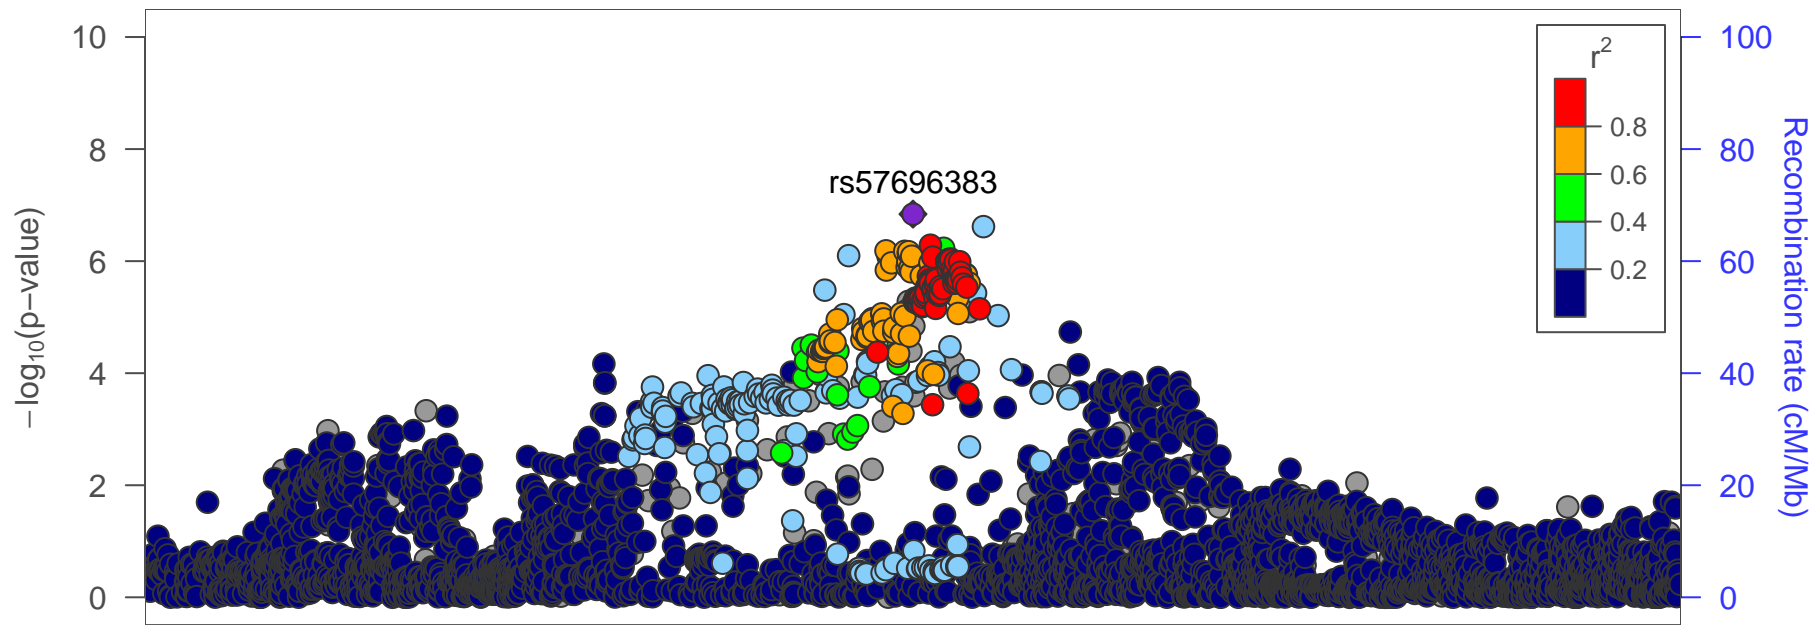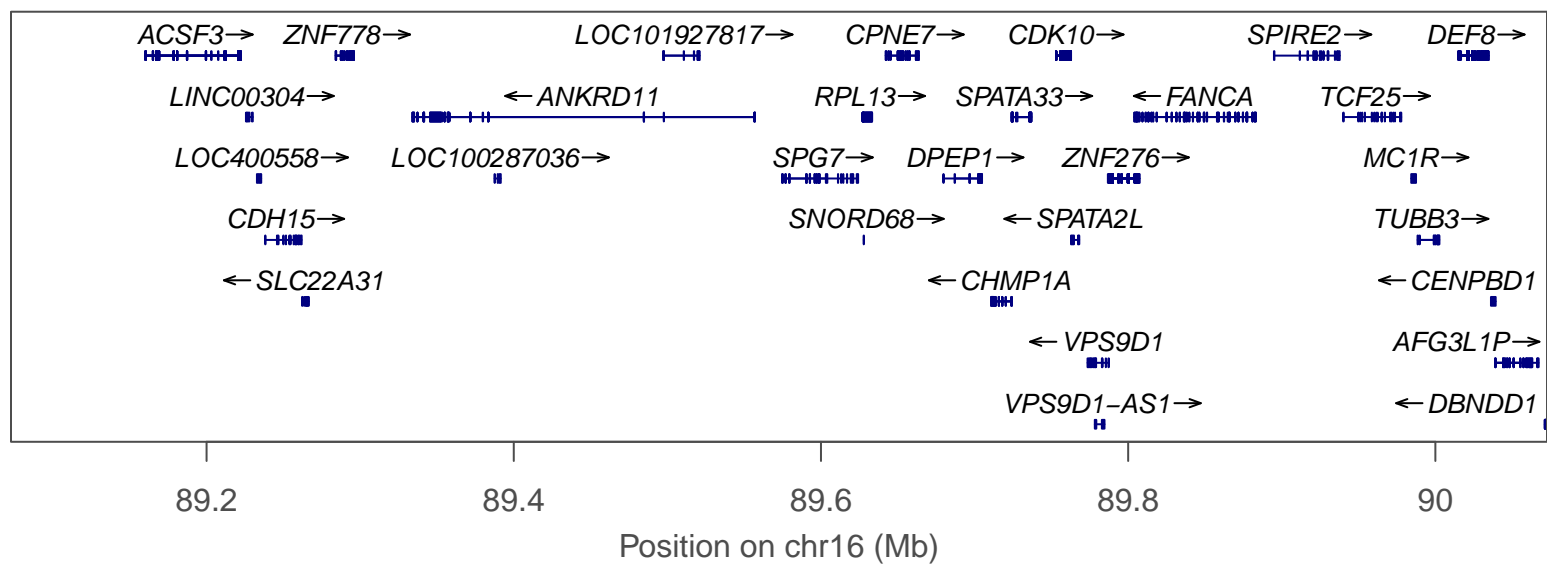

Plotted SNPs

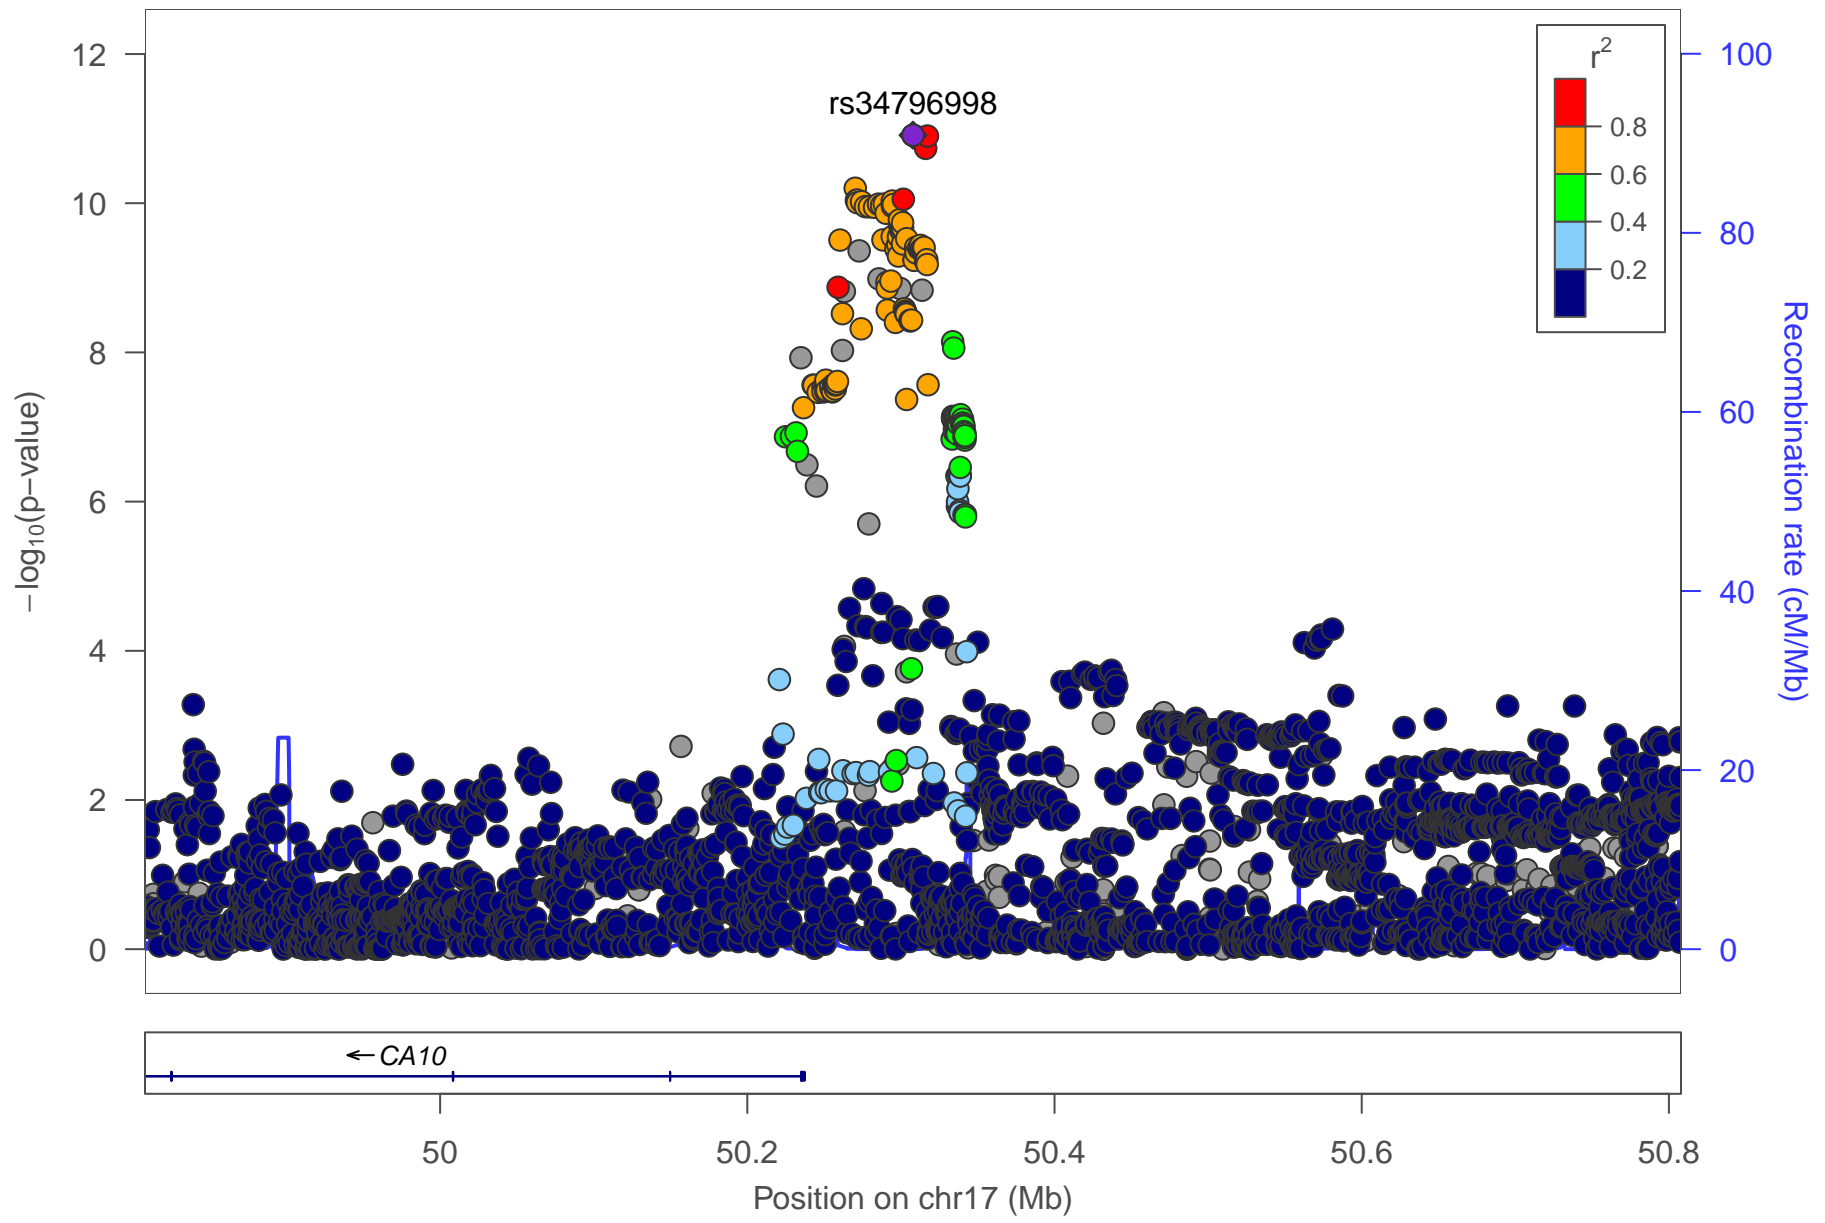

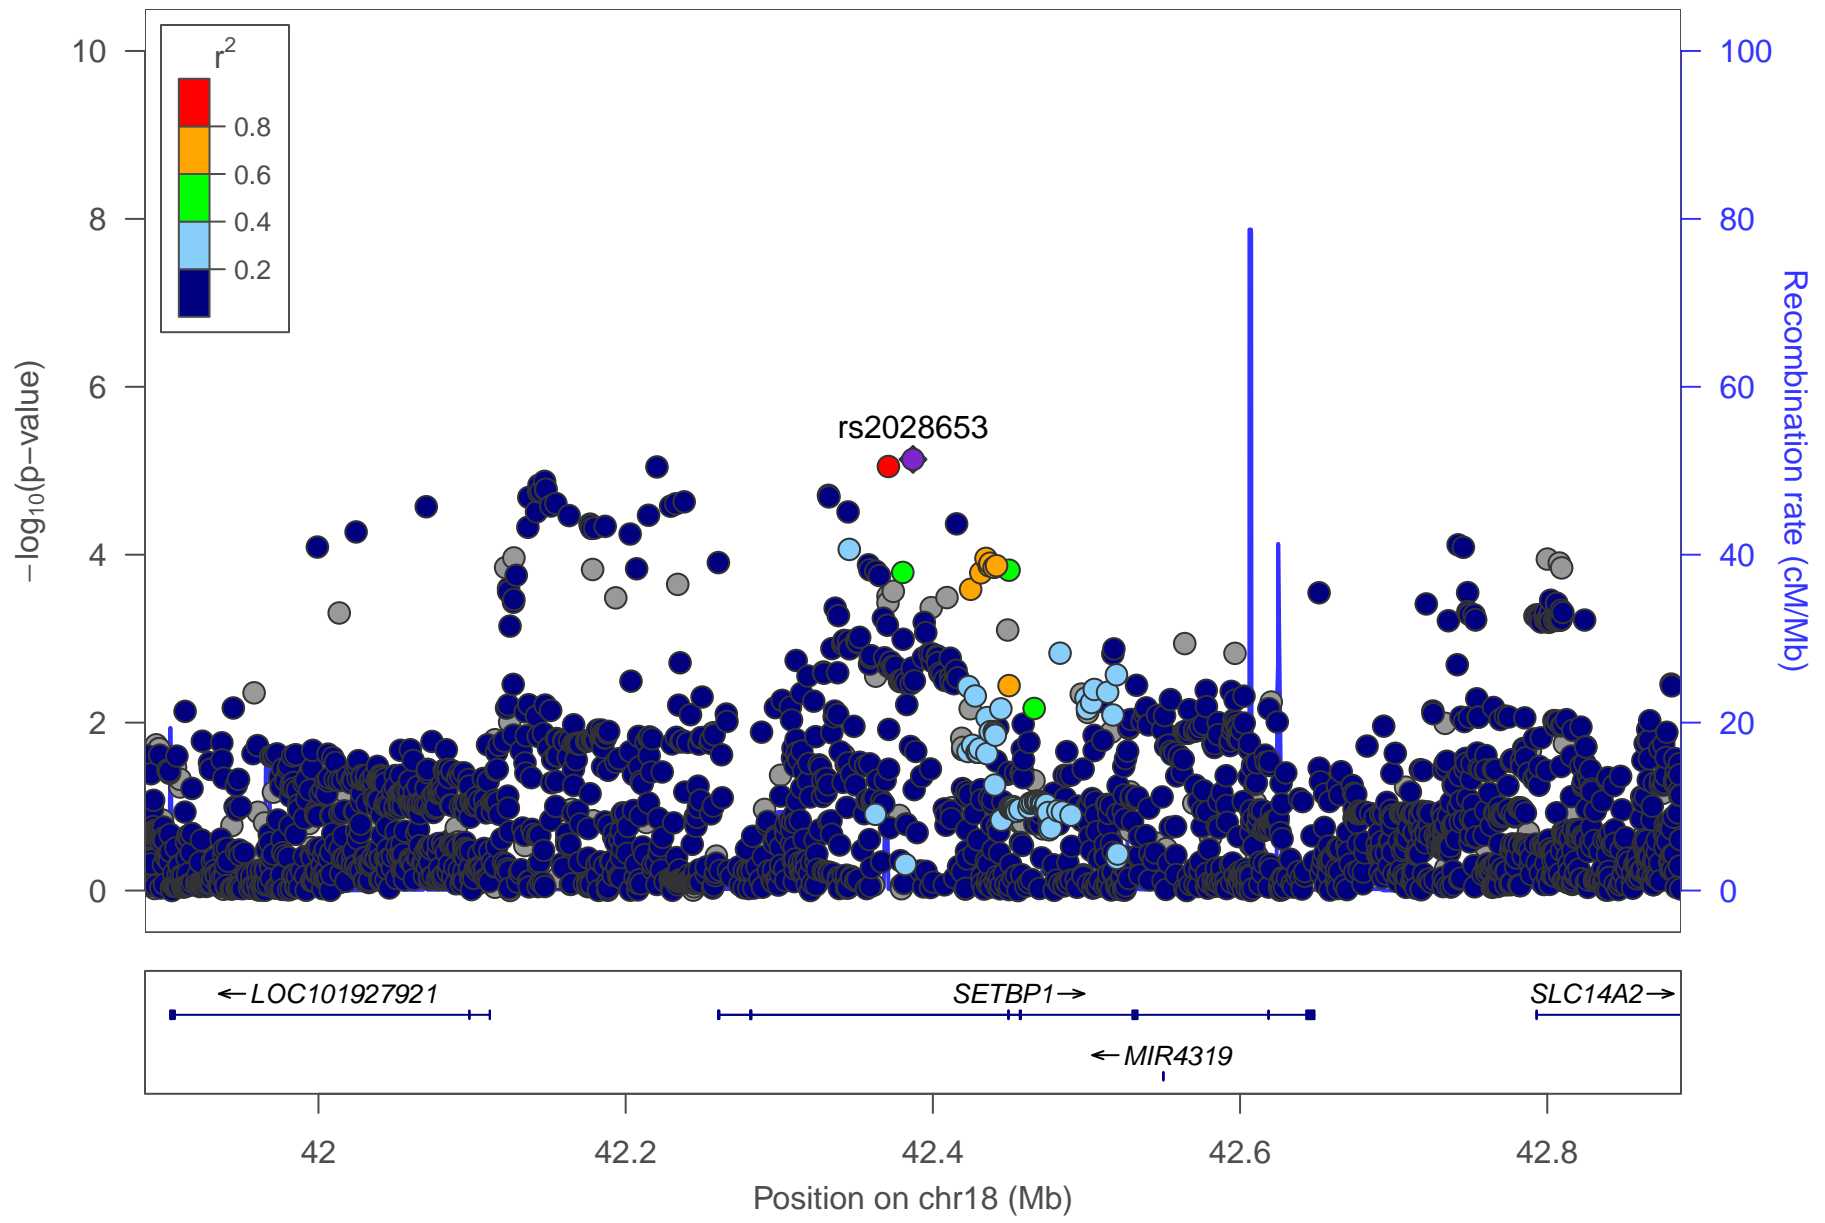

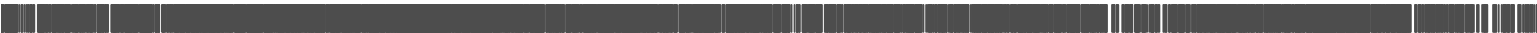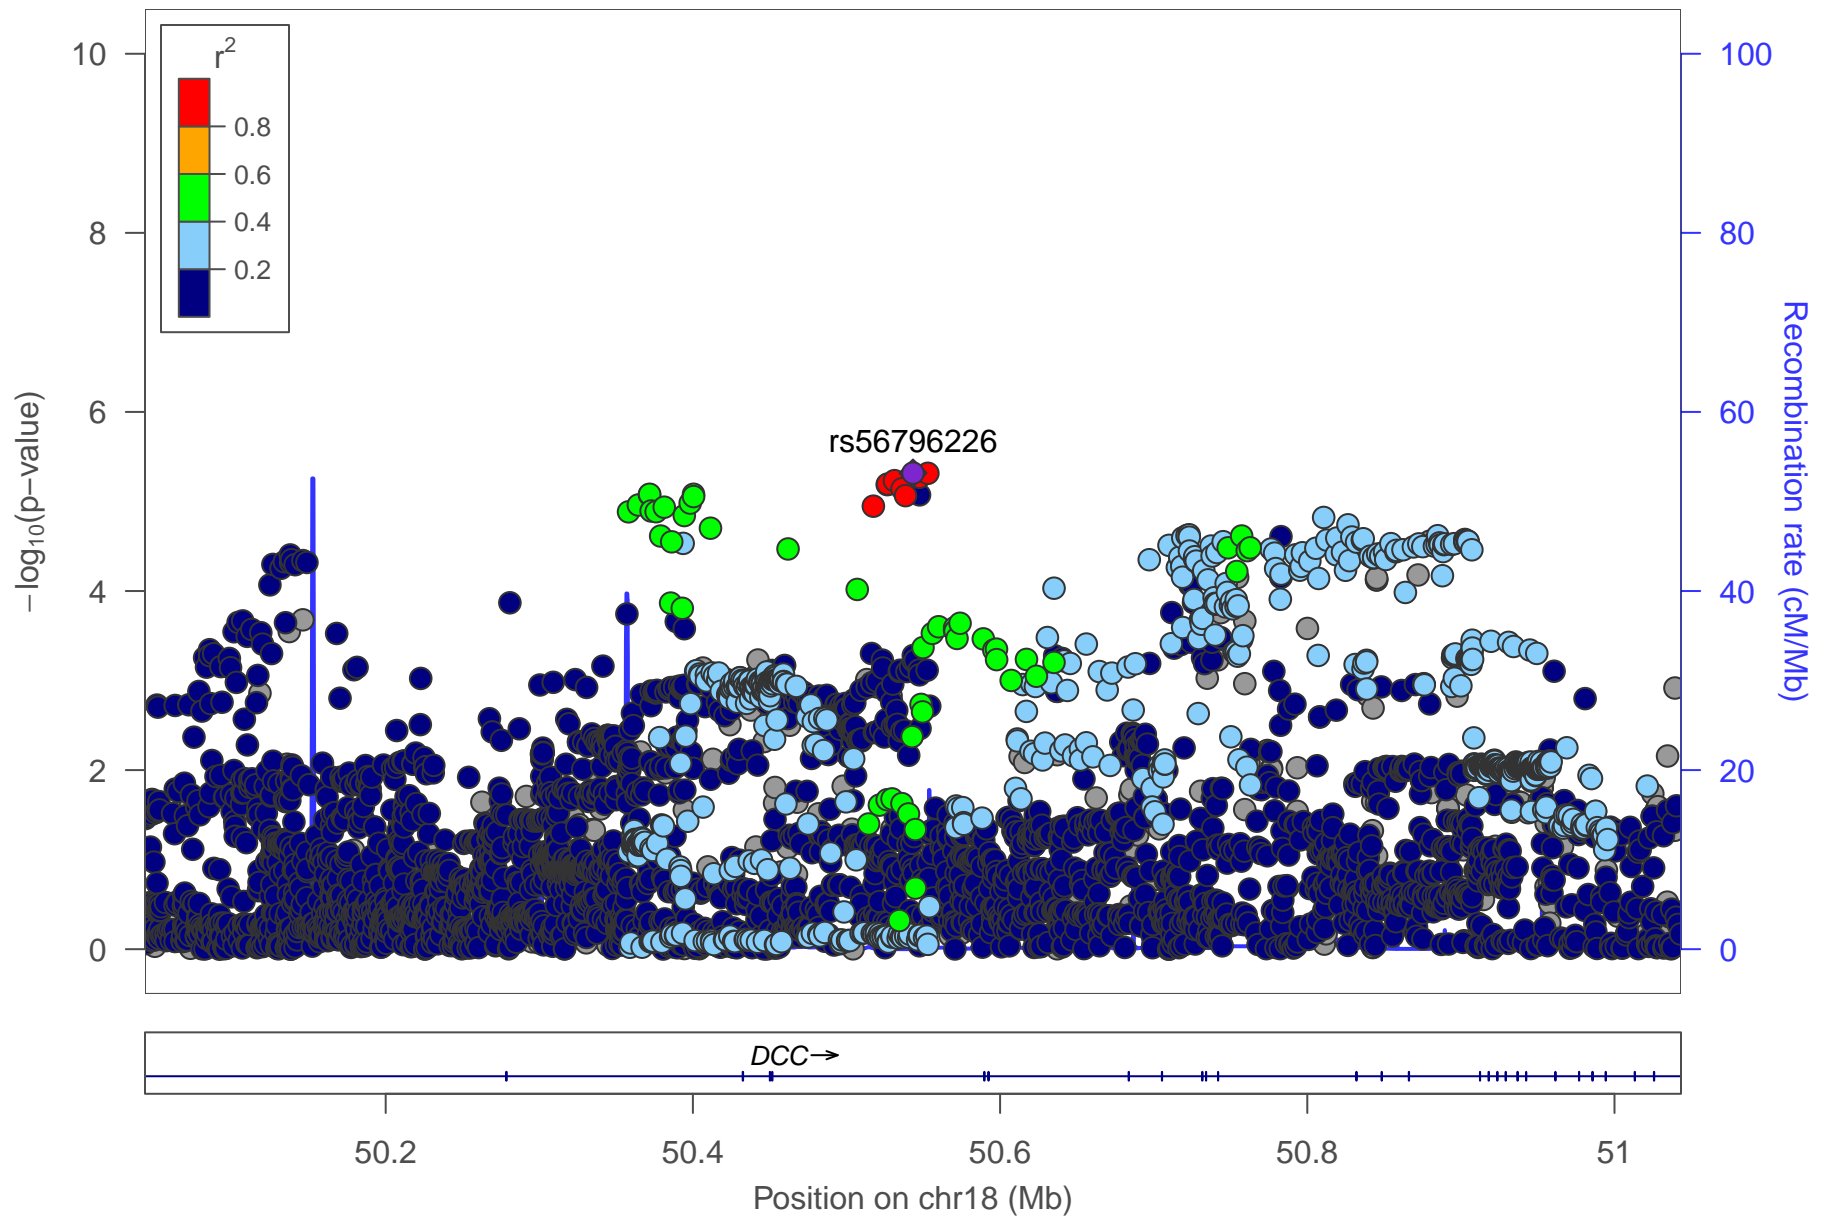

Plotted SNPs

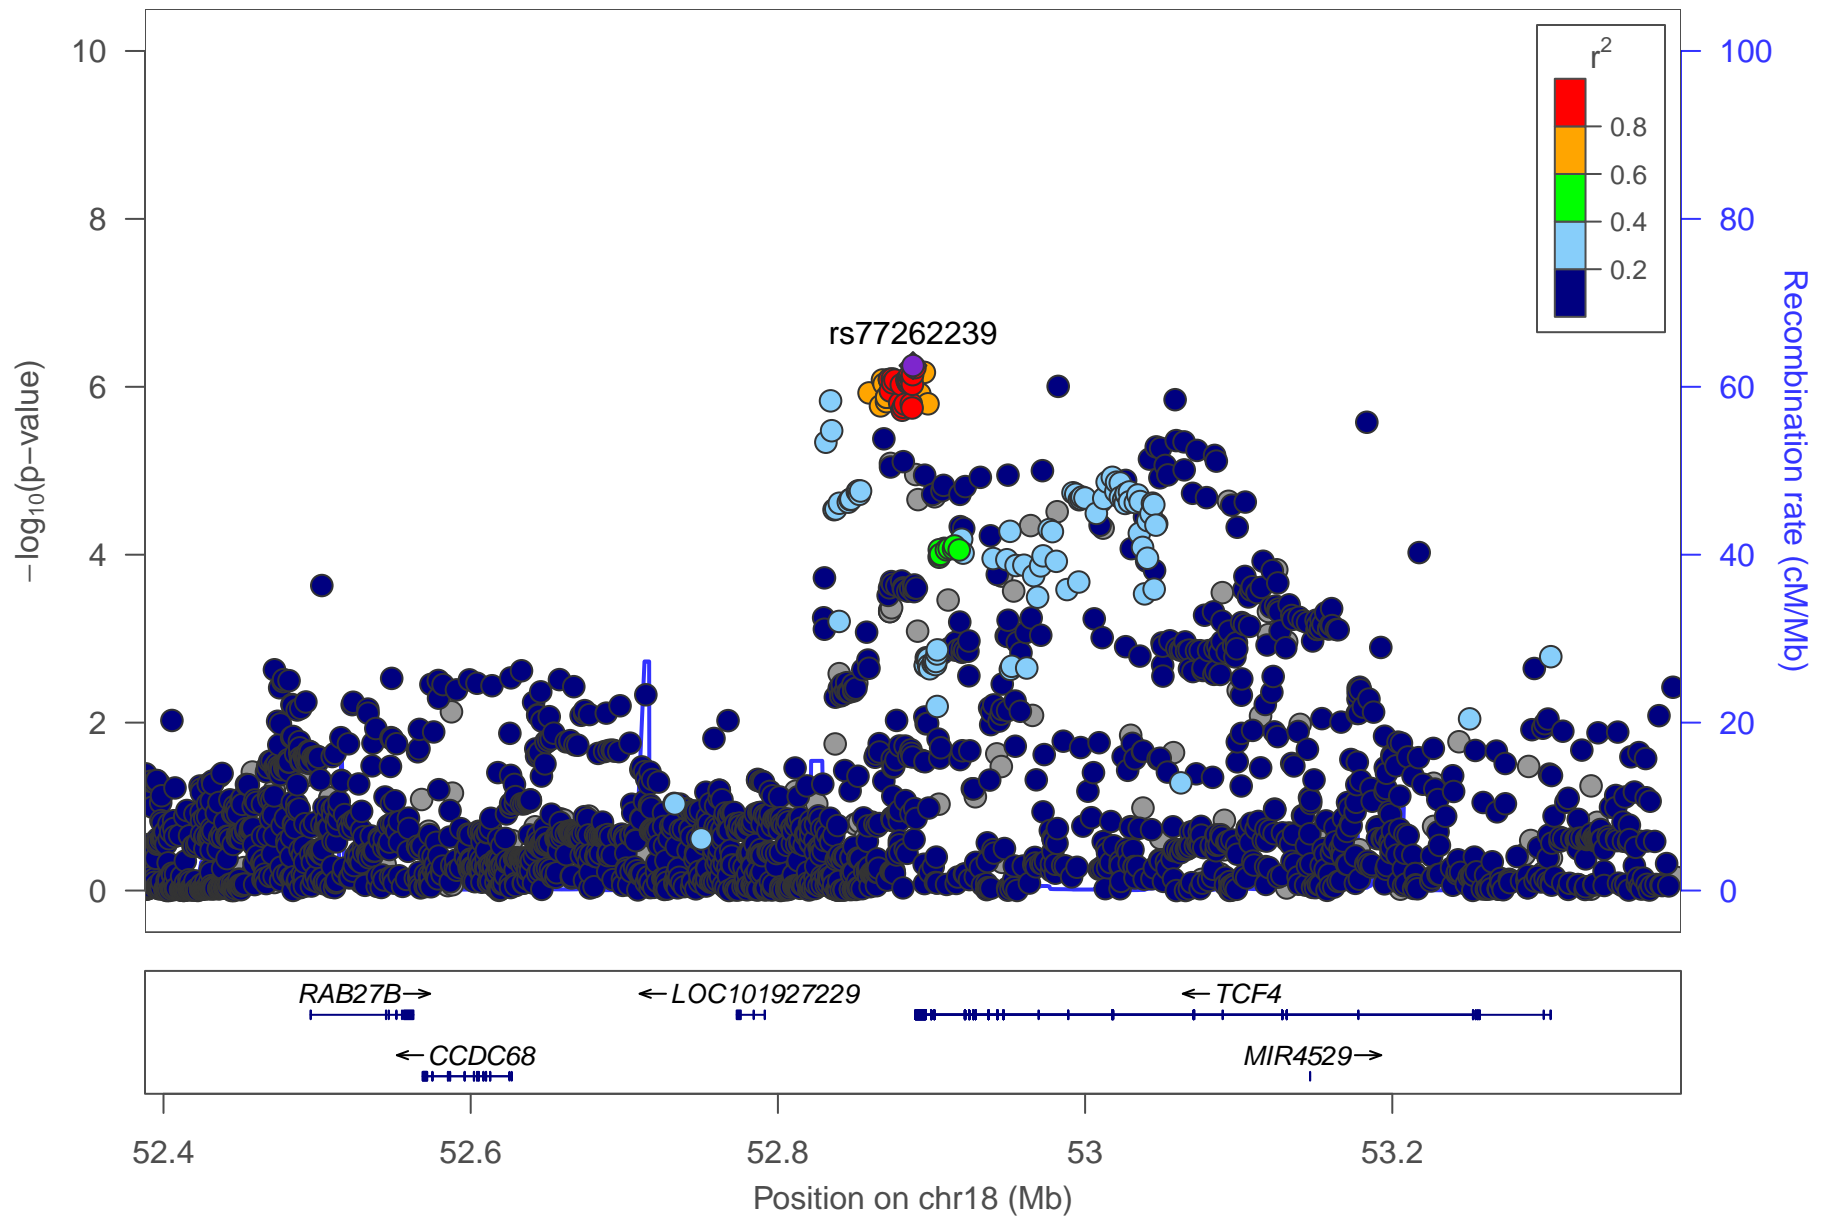

Plotted SNPs

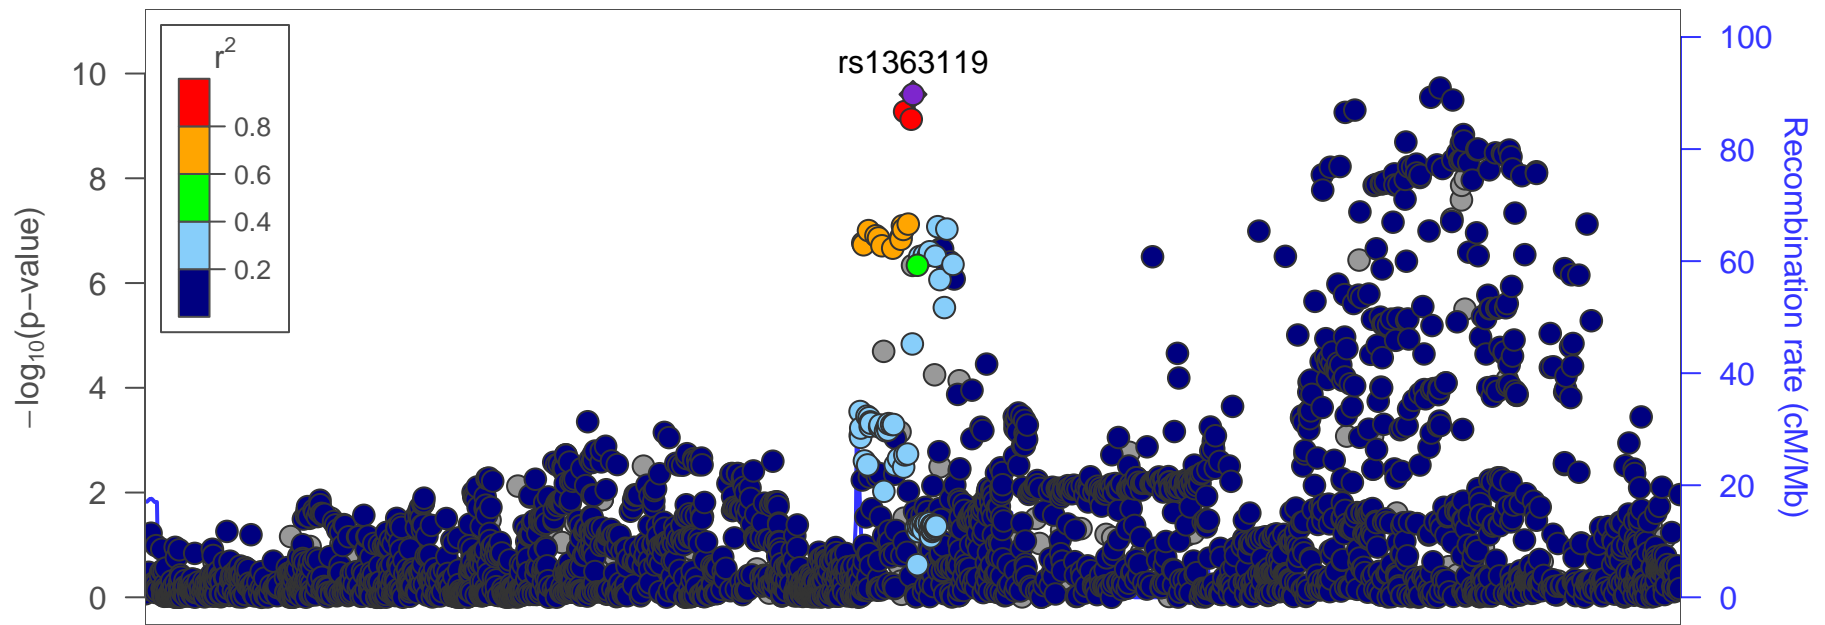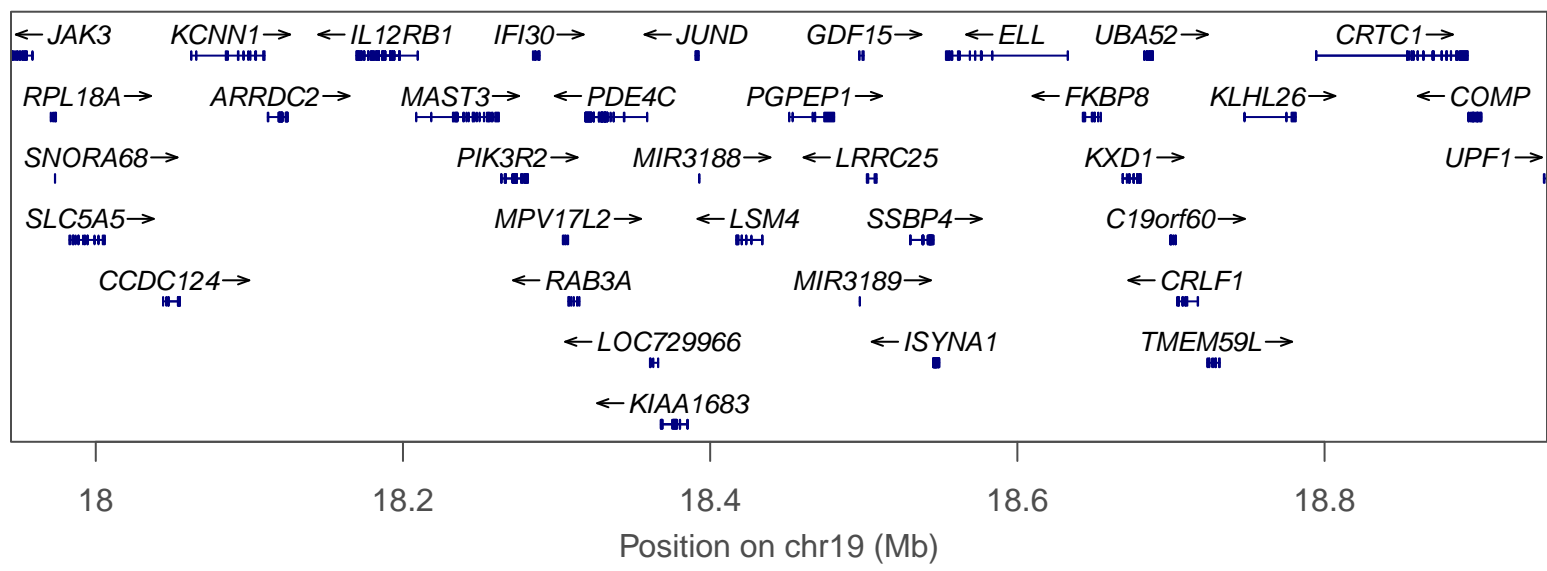

Plotted SNPs

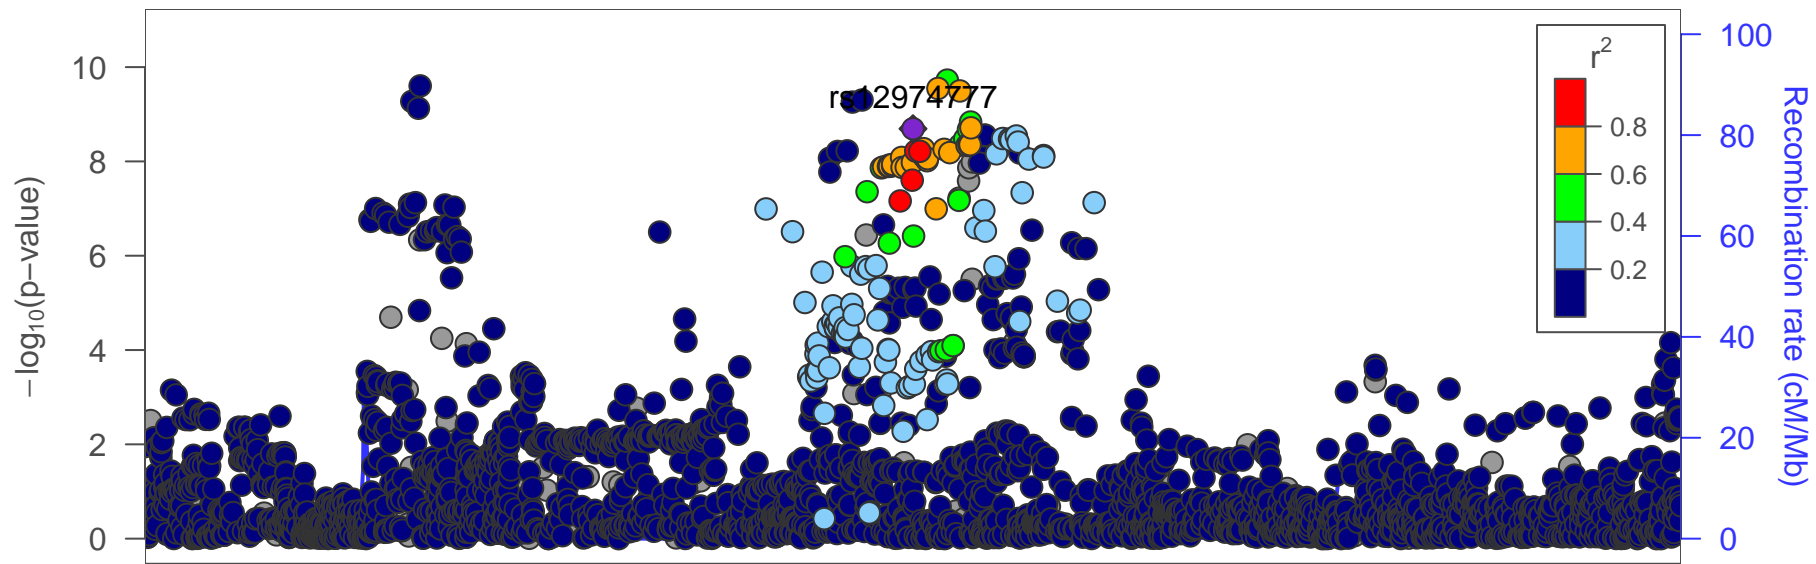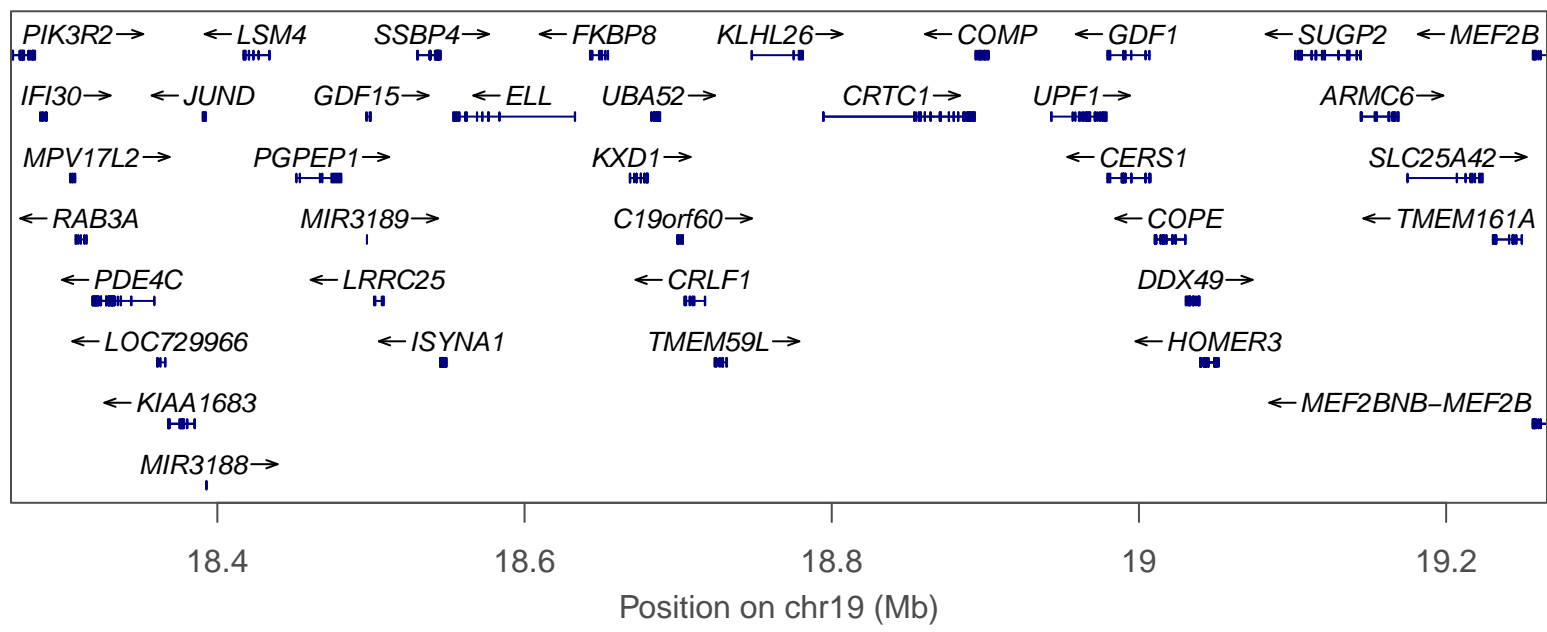



Plotted SNPs

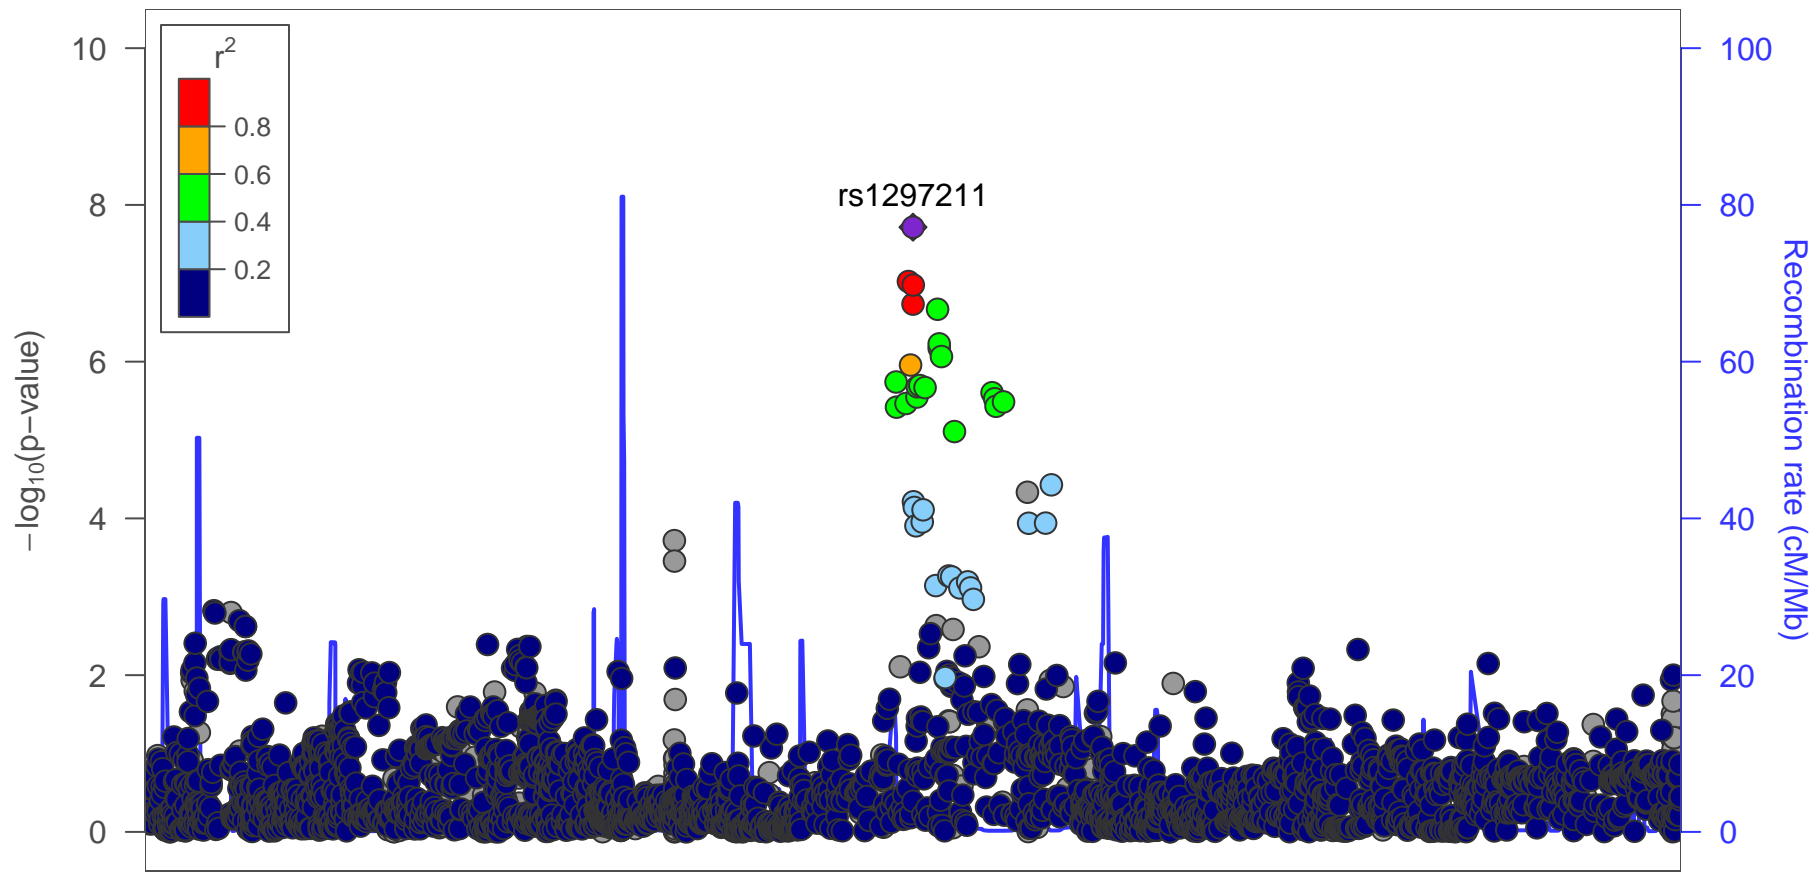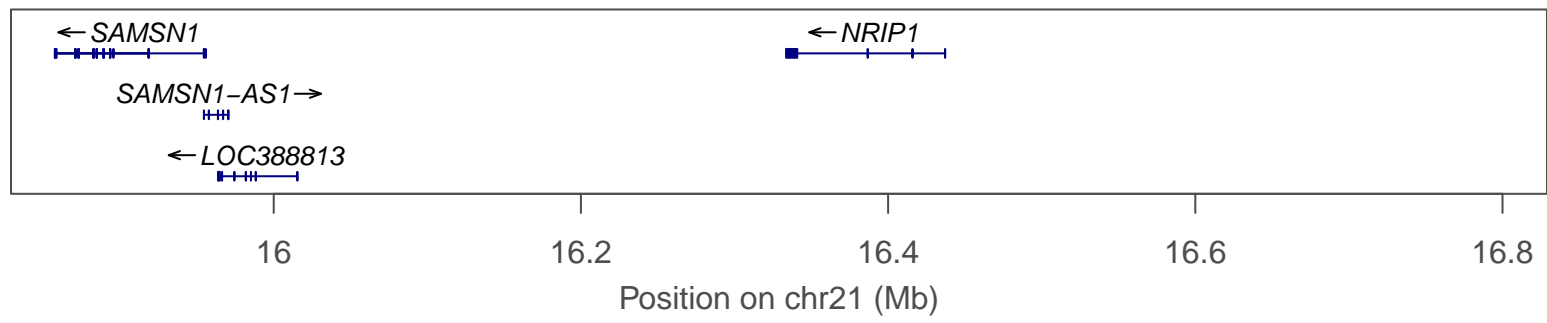

Plotted SNPs

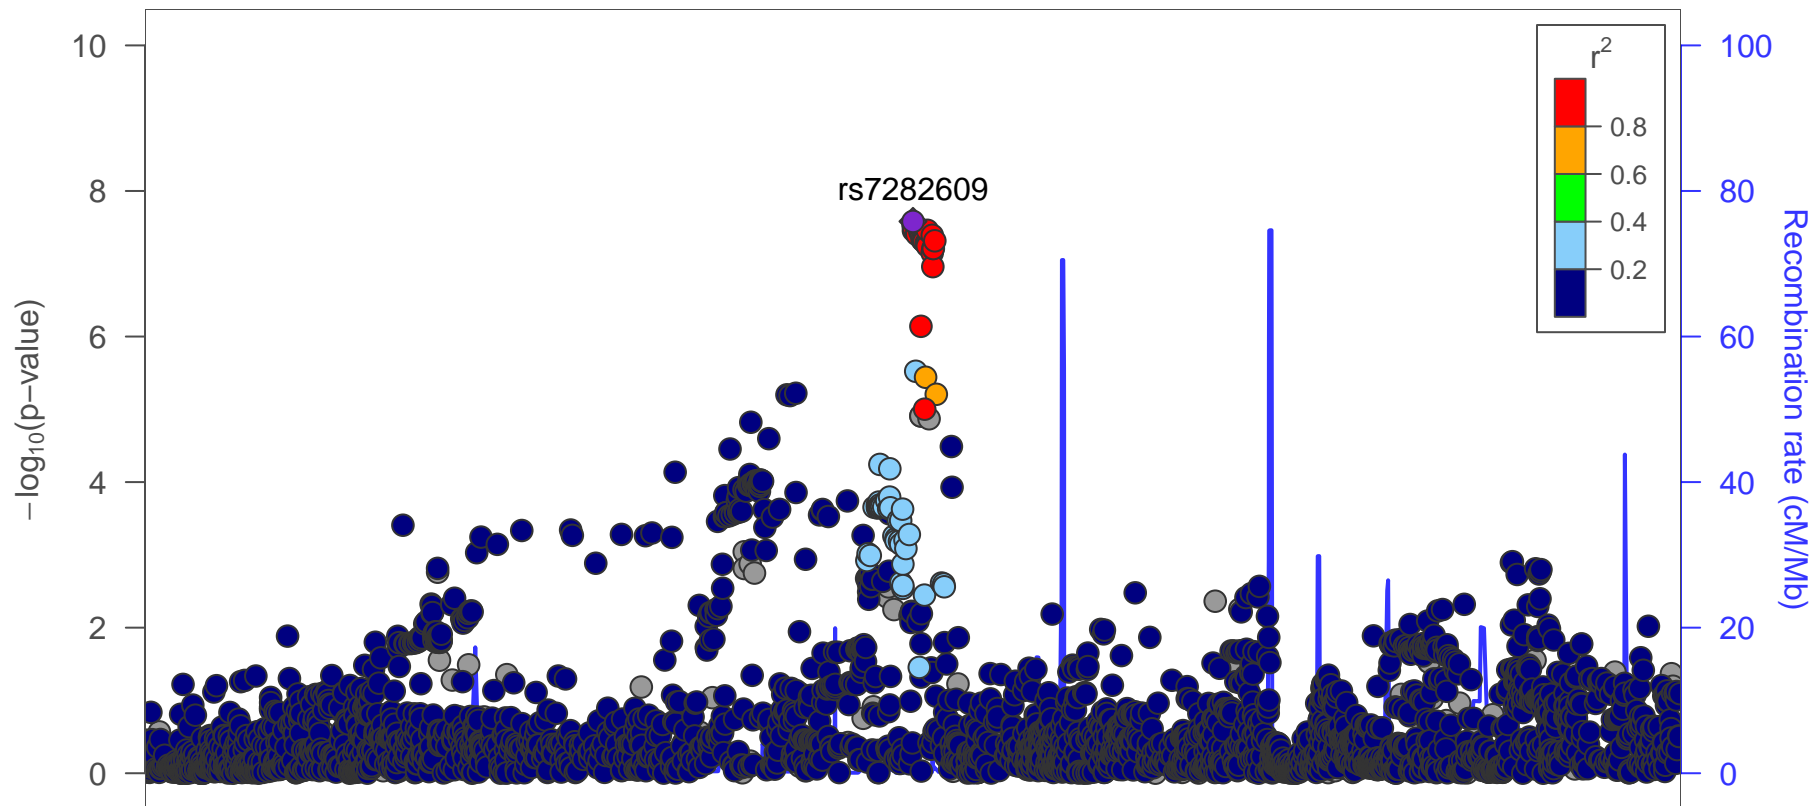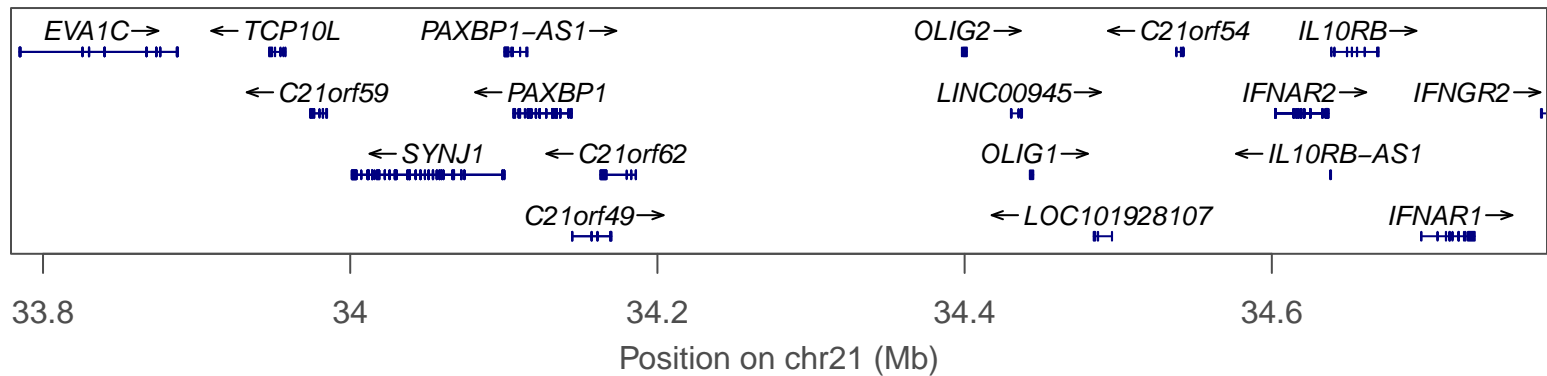

**Supplementary Figure 3.** Locuszoom plots for each genome-wide significant locus in the GERD GWAS.

**Supplimentary Table 1. GERD phenotype data extraction**

| source      | Field ID | Description                            | Category                         | code        | count* |
|-------------|----------|----------------------------------------|----------------------------------|-------------|--------|
| ICD10       | 41202    | Diagnoses - main ICD10                 | Summary Information              | K21.0/K21.9 | 16,420 |
|             | 41204    | Diagnosis - secondary ICD10            | Summary Information (diagnoses)  |             | 15,419 |
| Self-report | 20002    | Non-cancer illness code, self-reported | Medical conditions               | 1138        | 23,774 |
| ICD9        | 41203    | Diagnoses - main ICD9                  | Summary Information              | 53010/53011 | 17     |
|             | 41205    | Diagnosis - secondary ICD9             | Summary Information (diagnoses)  |             | 3      |
| OPCS        | 41200    | Operative procedures - main OPCS       | Summary Information              | G24/G25     | 1000   |
|             | 41210    | Operative procedures - secondary OPCS  | Summary Information (operations) |             | 205    |

\*count: the occurrence of the corresponding code.

**Supplementary Table 2. Phenotypic code exclude in control.**

| <b>source</b> | <b>Exclude code</b> | <b>Data code</b> |
|---------------|---------------------|------------------|
| ICD10         | K00-K93             | 19               |
| Self-report   | 1134-1143           | 6                |
| ICD9          | 5200-5799           | 87               |
| OPCS          | G-J                 | 240              |

**Supplementary Table 3. Extract GERD phenotype from Treatment/medication**

| Medications-verbal interview)                | medicine        | count  |
|----------------------------------------------|-----------------|--------|
| Reduce acid production                       | cimetidine      | 4      |
| As above                                     | tagamet HB      | 15     |
| As above                                     | pepcid AC       | 13     |
| As above                                     | nizatidine      | 103    |
| As above                                     | ranitidine      | 8,959  |
| As above                                     | ranitil-150mg   | 7      |
| As above                                     | Zantac          | 271    |
| Block acid production and heal the esophagus | esomeprazole    | 1,763  |
| As above                                     | Nexium          | 882    |
| As above                                     | lansoprazole    | 19,353 |
| As above                                     | omeprazole      | 33,233 |
| As above                                     | pantoprazole    | 984    |
| As above                                     | gaviscon liquid | 2,876  |

**Antacids that neutralize stomach acid:** Mylanta, Roloids and Tums (none of them can be found in UKB)

**Supplementary Table 4. Number of individuals in UKBB with GERD phenotype**

| <b>phenotype</b>             | <b>case</b> | <b>control</b> | <b>total</b> |
|------------------------------|-------------|----------------|--------------|
| union (meds+self_ICD10+etc.) | 75,356      | 279,997        | 355,353      |
| union (meds+self_ICD10+etc.) | 75,356      | 279,997        | 355,353      |
| self-ICD10                   | 43,532      | 279,997        | 323,529      |
| ICD10-only                   | 27,163      | 279,997        | 307,160      |
| self_only                    | 21,981      | 279,997        | 301,978      |
| meds_only                    | 58,170      | 279,997        | 338,167      |
| CD9_only                     | 19          | 279,997        | 280,016      |
| operative procedure          | 1,101       | 279,997        | 281,098      |
| self_ICD10                   | 43,659      | 279,997        | 323,656      |

**Supplementary Table 5. BE(Barrett's esophagus) phenotype data extraction**

| source | Field ID | Description                 | Category                        | code  | count* |
|--------|----------|-----------------------------|---------------------------------|-------|--------|
| ICD10  | 41202    | Diagnoses - main ICD10      | Summary Information (diagnoses) | K22.7 | 2,400  |
|        | 41204    | Diagnosis - secondary ICD10 | Summary Information (diagnoses) |       | 1,211  |



**Supplimentary Table 6. Esophageal Adenocarcinoma phenotype data extraction**

| source | Field ID | Description                | Category                                  | code | count* |
|--------|----------|----------------------------|-------------------------------------------|------|--------|
| ICD10  | 40006    | Type of Cancer: ICD10      | Cancer register - Health-related outcomes | C15  | 1,536  |
| Tumour | 40011    | Histology of cancer tumour | Cancer register - Health-related outcomes | 8140 | 38360  |
|        |          |                            |                                           | 8141 | 28     |
|        |          |                            |                                           | 8144 | 271    |
|        |          |                            |                                           | 8147 | 14     |
|        |          |                            |                                           | 8160 | 301    |
|        |          |                            |                                           | 8190 | 2      |
|        |          |                            |                                           | 8210 | 306    |
|        |          |                            |                                           | 8211 | 1481   |
|        |          |                            |                                           | 8220 | 11     |
|        |          |                            |                                           | 8221 | 5      |
|        |          |                            |                                           | 8245 | 14     |
|        |          |                            |                                           | 8250 | 72     |
|        |          |                            |                                           | 8260 | 736    |
|        |          |                            |                                           | 8262 | 23     |
|        |          |                            |                                           | 8263 | 955    |
|        |          |                            |                                           | 8270 | 63     |
|        |          |                            |                                           | 8290 | 95     |
|        |          |                            |                                           | 8310 | 1301   |
|        |          |                            |                                           | 8313 | 3      |
|        |          |                            |                                           | 8323 | 32     |
|        |          |                            |                                           | 8330 | 281    |
|        |          |                            |                                           | 8331 | 17     |
|        |          |                            |                                           | 8332 | 7      |
|        |          |                            |                                           | 8333 | 2      |
|        |          |                            |                                           | 8400 | 10     |
|        |          |                            |                                           | 8401 | 38     |
|        |          |                            |                                           | 8408 | 2      |
|        |          |                            |                                           | 8410 | 18     |
|        |          |                            |                                           | 8480 | 1451   |
|        |          |                            |                                           | 8481 | 246    |
|        |          |                            |                                           | 8500 | 30746  |
|        |          |                            |                                           | 8503 | 138    |
|        |          |                            |                                           | 8570 | 21     |
| 8571   | 1        |                            |                                           |      |        |
| 8573   | 6        |                            |                                           |      |        |
| 9014   | 6        |                            |                                           |      |        |
| 9015   | 4        |                            |                                           |      |        |

items(8154;8161;8215;8251;8255;8322;8382;8283;8384;8413;8420;8525;8572;8576) have zero count

Supplementary Table 7. PBS code in QSKIN data

| <b>reduce acid production:</b>                      |                 |
|-----------------------------------------------------|-----------------|
| Code & Prescriber                                   | medical product |
| 1158Y                                               | cimetidine      |
| 2487X,2488Y                                         | pepcid AC       |
| 1504E,1505F                                         | nizatidine      |
| 1977C,1978D,1937Y,8162N                             | ranitidine      |
|                                                     |                 |
| <b>block acid production</b>                        |                 |
| Code & Prescriber                                   | medical product |
| 3401B,8601Q,10295W,10343J,8600P,8886Q,10330Q,10331R | esomeprazole    |
| 9477T,9478W,8198L,2240X,2241Y,9331D                 | lansoprazole    |
| 1326T,1327W,8332M,8331L,8333N,9109K,9110L           | omeprazole      |
| 8399C,9423Y,9424B,8007K,8008L                       | pantoprazole    |
| 8507R, 8508T, 8509W                                 | RABEPRAZOLE     |

**Supplementary Table 8. Number of controls in BE and EA cohorts**

|          | UKBB  | BEACON | Cambridge | Oxford | Bonn  | total  |
|----------|-------|--------|-----------|--------|-------|--------|
| BE       | 2,831 | 2,406  | 873       | 1,851  | 1,037 | 8,998  |
| EA       | 568   | 1,508  | 995       | N/A    | 1,609 | 4,680  |
| #control | 2,088 | 6,718  | 3,408     | 3,496  | 3,537 | 19,247 |

**Supplementary Table 9. Top SNPs in BEEA in GERD GWAS after excluding BE/EA cases**

| <b>SNP</b> | <b>Chr</b> | <b>Position</b> | <b>Tested allele</b> | <b>Other allele</b> | <b>Nearest gene or region</b> | <b>effect</b> | <b>se</b> | <b>pvalue</b> |
|------------|------------|-----------------|----------------------|---------------------|-------------------------------|---------------|-----------|---------------|
| rs7255     | 2          | 20878820        | T                    | C                   | GDF7 and LDAH                 | 0.0236        | 0.0056    | 2.73E-05      |
| rs1396065  | 2          | 200045039       | T                    | C                   | SATB2                         | 0.0154        | 0.0059    | 9.71E-03      |
| rs2687202  | 3          | 70929983        | T                    | C                   | FOXP1                         | 0.0341        | 0.0061    | 2.61E-08      |
| rs9918259  | 5          | 663092          | T                    | C                   | TPPP and CEP72                | -0.0311       | 0.007     | 9.80E-06      |
| rs9257809  | 6          | 29356331        | A                    | G                   | MHC region                    | 0.0464        | 0.0085    | 5.00E-08      |
| rs6242317  | 6          | 62195368        | A                    | G                   | KHDRBS2 and MTRNR2L9          | -0.0071       | 0.0076    | 3.50E-01      |
| rs1745175  | 7          | 117256712       | A                    | G                   | CFTR                          | 0.0129        | 0.0082    | 1.17E-01      |
| rs1774915  | 8          | 10068073        | A                    | G                   | MSRA                          | -0.0023       | 0.0076    | 7.67E-01      |
| rs1010851  | 8          | 11435516        | T                    | C                   | LINC00208and BLK              | 0.0053        | 0.0056    | 3.42E-01      |
| rs7852462  | 9          | 100310501       | T                    | C                   | TMOD1                         | 0.0066        | 0.0058    | 2.54E-01      |
| rs1247942  | 12         | 114673723       | C                    | G                   | LOC105369996and TBX5          | 0.0149        | 0.0057    | 8.75E-03      |
| rs2464469  | 15         | 58362025        | A                    | G                   | ALDH1A2                       | 0.0034        | 0.0057    | 5.47E-01      |
| rs1979654  | 16         | 86396835        | C                    | G                   | LOC732275and FOXF1            | 0.0001        | 0.0057    | 9.98E-01      |
| rs1996205  | 19         | 18804294        | T                    | TG                  | CRTC1                         | 0.0254        | 0.0063    | 5.19E-05      |
