# Supplementary material for: Gastroesophageal reflux GWAS identifies risk loci that also associate with subsequent severe esophageal diseases
Source: PubMed Central journal article supplement (PMC6746768; doi:10.1038/s41467-019-11968-2), 2019-09-16
Supplement: 41467_2019_11968_MOESM4_ESM.pdf [file 41467_2019_11968_MOESM4_ESM.pdf]

**Title: Supplementary Data 1.**

**Description:** 25 significantly associated genomic regions in meta-analysis of GERD

**Title: Supplementary Data 2.**

**Description:** LD hub results

**Title: Supplementary Data 3.**

**Description:** Gene ATLAS result

**Title: Supplementary Data 4.**

**Description:** Drugs in clinical trials

**Title: Supplementary Data 5.**

**Description:** MAGAMA gene based test results

**Title: Supplementary Data 6.**

**Description:** MetaXcan gene based test results

**Title: Supplementary Data 7.**

**Description:** Gene set enrichment analysis using DEPICT

**Title: Supplementary Data 8.**

**Description:** GERD GWAS after excluding BE/EA cases
